# Supplementary material for: Total synthesis of siphonazole and its O-methyl derivative, structurally unusual bis-oxazole natural products
Source: Royal Society of Chemistry journal article supplement (doi:10.1039/b810855b), 2008-01-01
Supplement: b810855b.pdf [file b810855b.pdf]

**Total synthesis of siphonazole and its *O*-methyl derivative, structurally unusual bis-oxazole natural products**

Jörg Linder, Alexander J. Blake and Christopher J. Moody

**ELECTRONIC SUPPLEMENTARY INFORMATION**

|                                                                                                                       |        |
|-----------------------------------------------------------------------------------------------------------------------|--------|
| Experimental details for compounds <b>4</b> , <b>5</b> , <b>9 – 14</b> , <b>20</b> , <b>21</b> , 2,4-pentadienylamine | ESI 2  |
| X-ray crystal structure of compound <b>8b</b>                                                                         | ESI 18 |
| Copies of <sup>1</sup> H and <sup>13</sup> C NMR spectra                                                              | ESI 19 |
| HPLC data for natural and synthetic siphonazole                                                                       | ESI 74 |

## Methyl 2-diazo-3-oxobutanoate

Prepared by the literature method.<sup>1</sup>

## (E)-3-(3-*tert*-Butyldimethylsiloxy-4-methoxyphenyl)acrylamide **4a**

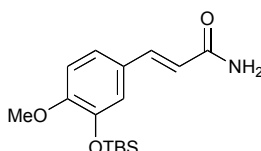

3-Hydroxy-4-methoxycinnamic acid **3a** (5.0 g, 25.7 mmol) was dissolved in DMF (30 mL), *tert*-butyldimethylchlorosilane (8.92 g, 59.2 mmol) and imidazole (7.30 g, 111 mmol) were added and the mixture stirred at room temperature for 20 h. The mixture was poured into water (50 mL), extracted with ether (2 × 100 mL), dried (MgSO<sub>4</sub>) and the solvent removed under reduced pressure. The residue was dissolved in dichloromethane (80 mL), cooled to 0 °C and treated with oxalyl chloride (2.6 mL, 30.8 mmol) and DMF (2 drops). The mixture was stirred for 1 h at this temperature before ammonia (gas) was bubbled through for 45 min. Saturated aqueous sodium hydrogen carbonate (40 mL) was added, the layers separated and the aqueous layer extracted with dichloromethane (2 × 50 mL), the combined organic layers dried (MgSO<sub>4</sub>) and the solvent removed *in vacuo*. Purification by chromatography (light petroleum: ethyl acetate 1:1 + 0.5% triethylamine) gave the *title compound 4a* as a colourless solid (6.5 g, 82%); *R*<sub>f</sub> = 0.22 (light petroleum: ethyl acetate 1:1); mp 161-163 °C; (Found: C, 62.4; H, 8.1; N, 4.5. C<sub>16</sub>H<sub>25</sub>NO<sub>3</sub>Si requires C, 62.5; H, 8.2; N, 4.6%); (Found: MH<sup>+</sup>, 308.1683. C<sub>16</sub>H<sub>26</sub>NO<sub>3</sub>Si requires 308.1676); *v*<sub>max</sub> (CHCl<sub>3</sub>)/cm<sup>-1</sup> 3528, 3412 2931, 1676, 1628, 1587, 1376, 1275, 1139, 983; *δ*<sub>H</sub> (400 MHz; CDCl<sub>3</sub>) 7.51 (1H, d, *J* 15.6, ArCH=CH), 7.06 (1H, dd, *J* 8.3, 2.1, ArH-6), 7.02 (1H, d, *J* 2.1, ArH-2), 6.80 (1H, d, *J* 8.3, ArH-5), 6.29 (1H, d, *J* 15.6, ArCH=CH), 6.11 (1H, s, NH<sub>2</sub>), 5.86 (1H, s, NH<sub>2</sub>), 3.81 (3H, s, OMe), 0.99

(9H, s, CMe<sub>3</sub>), 0.14 (6H, s, SiMe);  $\delta_C$  (100 MHz; CDCl<sub>3</sub>) 168.5 (C), 152.7 (C), 145.1 (C), 142.1 (CH), 127.5 (C), 122.8 (CH), 119.6 (CH), 117.3 (CH), 111.7 (CH), 55.4 (Me), 25.6 (Me), 18.4 (C), -4.7 (Me);  $m/z$  (ESI<sup>+</sup>) 308 (MH<sup>+</sup>, 100%).

**(E)-3-Methyl 2-((3-*tert*-butyldimethylsiloxy 4-methoxyphenyl)acrylamido)-3-oxobutanoate 5a**

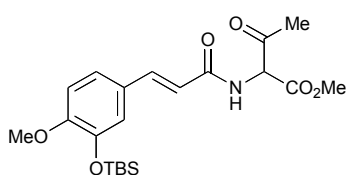

A solution of (*E*)-3-(3-*tert*-butyldimethylsiloxy-4-methoxyphenyl)acrylamide **4a** (2.0 g, 6.40 mmol) and dirhodium tetraacetate (71.0 mg, 0.20 mmol, 2.50 mol%) in dry dichloromethane (25 mL) was heated to reflux. A solution of methyl 2-diazo-3-oxobutanoate (1.50 g, 10.3 mmol) in dichloromethane (5 mL) was then added *via* syringe pump over a 16 h period. After the addition was complete the reaction mixture was heated under reflux for a further 4 h. After removal of the solvent under reduced pressure, and purification by chromatography (eluting ethyl acetate/light petroleum 2/3), the *title compound* **5a** was obtained as a colourless oil (2.40 g, 90%);  $R_f$  = 0.68 (light petroleum: ethyl acetate 2:3); (Found: MH<sup>+</sup>, 422.1993. C<sub>21</sub>H<sub>32</sub>NO<sub>6</sub>Si requires 422.1998);  $\nu_{\max}$  (CHCl<sub>3</sub>)/cm<sup>-1</sup> 3416, 2939, 1756, 1729, 1668, 1626, 1491, 1361, 1275, 1137, 1031;  $\delta_H$  (400 MHz; CDCl<sub>3</sub>) 7.53 (1H, d,  $J$  15.6, ArCH=CH), 7.08 (1H, dd,  $J$  8.3, 2.1, ArH-6), 7.04 (1H, d,  $J$  2.1, ArH-2), 6.82 (1H, d,  $J$  8.3, ArH-5), 6.72 (1H, d,  $J$  6.4, NH), 6.33 (1H, d,  $J$  15.6, ArCH=CH), 5.40 (1H, d,  $J$  6.4, CH), 3.84 (3H, s, OMe), 3.83 (3H, s, OMe), 2.43 (3H, s, Me), 1.01 (9H, s, CMe<sub>3</sub>), 0.17 (6H, s, SiMe<sub>2</sub>);  $\delta_C$  (100 MHz; CDCl<sub>3</sub>) 198.7 (C), 166.7 (C), 165.7 (C), 152.9 (C), 145.1 (CH), 142.4 (C), 127.4 (C), 123.0

(CH), 119.6 (CH), 116.6 (CH), 111.7 (CH), 63.1 (C), 55.4 (Me), 53.4 (Me), 28.1 (Me), 25.7 (Me), 18.4 (C), -4.6 (Me);  $m/z$  (ESI<sup>+</sup>) 444 (MNa<sup>+</sup>, 100%), 422 (MH<sup>+</sup>, 31%), 291 (100%).

### (*E*)-3-(3,4-Dimethoxyphenyl)acrylamide **4b**

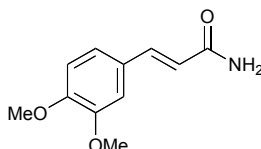

To a solution of 3,4-dimethoxycinnamic acid **3b** (10.0 g, 48.0 mmol) in THF (150 mL) was added triethylamine (14.7 mL, 111 mmol) and the solution cooled to 0 °C. A solution of ethyl chloroformate (10.6 mL, 111 mmol) in THF (25 mL) was added and the mixture stirred for 15 min. Aqueous ammonium hydroxide (30% in water; 40 mL) in THF (25 mL) was then added dropwise over 5 min. After 15 min, the reaction mixture was warmed to room temperature and stirred for a further 18 h. The solvent was evaporated to give a pale yellow solid. The crude product was dissolved in dichloromethane and washed with water and brine, dried (MgSO<sub>4</sub>) and the solvent was evaporated under reduced pressure to give the *title compound* as a colourless solid (3.60 g, 36%); mp 162-164 °C (lit.,<sup>2</sup> mp 166.5 °C); (Found: C, 63.5; H, 6.3; N, 6.8. C<sub>11</sub>H<sub>13</sub>NO<sub>3</sub> requires C, 63.8; H, 6.3; N, 6.8%); (Found: MH<sup>+</sup>, 208.0978. C<sub>11</sub>H<sub>14</sub>NO<sub>3</sub> requires 208.0968);  $\nu_{\max}$  (CHCl<sub>3</sub>)/cm<sup>-1</sup> 3528, 3412, 2953, 1678, 1620, 1464, 1378, 1268, 1139, 1025;  $\delta_{\text{H}}$  (400 MHz; DMSO-*d*<sub>6</sub>) 7.45 (1H, br s), 7.37 (1H, d, *J* 15.8), 7.16 (1H, d, *J* 1.9), 7.10 (1H, dd, *J* 8.3, 1.9), 7.04 (1H, br s), 6.96 (1H, d, *J* 8.3), 6.51 (1H, d, *J* 15.8), 3.79 (3H, s), 3.77 (3H, s);  $\delta_{\text{C}}$  (100 MHz; DMSO-*d*<sub>6</sub>) 167.0 (C), 150.0 (C), 148.8 (C), 139.3 (CH), 127.6 (C), 121.4 (CH), 119.9 (CH), 111.6 (CH), 109.9 (CH), 55.4 (Me), 55.4 (Me);  $m/z$  (ESI<sup>+</sup>) 208 (MH<sup>+</sup>, 100 %).

**(E)-Methyl 2-(-3-(3,4-dimethoxyphenyl)acrylamido)-3-oxobutanoate 5b**

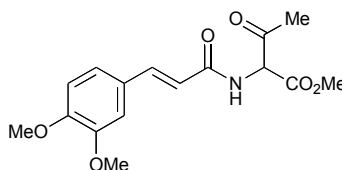

A solution of (*E*)-3-(3,4-dimethoxyphenyl)acrylamide **4b** (6.30 g, 30.4 mmol) and dirhodium tetraacetate (336 mg, 0.76 mmol, 2.50 mol%) in dry dichloromethane (60 mL) was heated to reflux. A solution of methyl 2-diazo-3-oxobutanoate (6.90 g, 48.6 mmol) in dichloromethane (15 mL) was then added *via* syringe pump over a 16 h period. After the addition was complete the reaction mixture was heated under reflux for a further 4 h. After removal of the solvent under reduced pressure, and purification by chromatography (eluting with ethyl acetate/light petroleum 3/2), the *title compound* **5b** was obtained as a light yellow solid (9.30 g, 95%);  $R_f = 0.28$  (light petroleum: ethyl acetate 2:3); mp 46-48 °C; (Found:  $MH^+$ , 322.1270.  $C_{16}H_{20}NO_6$  requires 322.1285);  $\nu_{max}$  ( $CHCl_3$ )/ $cm^{-1}$  3418, 2957, 1757, 1728, 1688, 1626, 1464, 1359, 1140, 1025;  $\delta_H$  (400 MHz;  $CDCl_3$ ) 7.58 (1H, d,  $J$  15.6, ArCH=CH), 7.08 (1H, dd,  $J$  8.3, 1.8, ArH-6), 7.03 (1H, d,  $J$  1.8, ArH-2), 6.85 (1H, d,  $J$  8.3, ArH-5), 6.78 (1H, d,  $J$  6.4, NH), 6.39 (1H, d,  $J$  15.6, ArCH=CH), 5.40 (1H, d,  $J$  6.4, CH), 3.91 (3H, s, OMe), 3.90 (3H, s, OMe), 3.84 (3H, s, OMe), 2.43 (3H, s, Me);  $\delta_C$  (100 MHz;  $CDCl_3$ ) 198.7 (C), 166.7 (C), 165.6 (C), 150.8 (C), 149.0 (C), 142.3 (CH), 127.3 (C), 122.3 (CH), 116.9 (CH), 110.9 (CH), 109.5 (CH), 63.1 (CH), 55.9 (Me), 55.8 (Me), 53.3 (Me), 28.0 (Me);  $m/z$  ( $ESI^+$ ) 344 ( $MNa^+$ , 83%), 322 ( $MH^+$ , 25%), 191 (100%).

**(E)-(3-*tert*-Butyldimethylsilane-4-methoxyphenyl) acrylonitrile 9a**

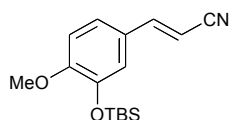

1,8-Diazabicyclo[5.4.0]undec-7-ene (3.70 mL, 24.5 mmol) and amide **4a** were dissolved in dichloromethane (25 mL) and stirred for 10 min at room temperature. Ethyl dichlorophosphate (1.70 mL, 14.6 mmol) was added and the mixture heated to reflux for 1 h. A solution of saturated aqueous ammonium chloride (10 mL) was added and the mixture stirred for further 10 min. The layers were separated, and the aqueous layer extracted with dichloromethane (20 mL). The combined organic layers were washed with brine (20 mL), dried ( $\text{MgSO}_4$ ) and the solvent removed under reduced pressure. Chromatography (light petroleum/ethyl acetate 4/1) gave the *title compound* **9a** (1.10 g, 75%) as a colourless solid,  $R_f = 0.72$  (light petroleum: ethyl acetate 1:1); mp 64-66 °C; (Found:  $\text{MH}^+$ , 290.1577.  $\text{C}_{16}\text{H}_{24}\text{NO}_2\text{Si}$  requires 290.1571);  $\nu_{\text{max}}$  ( $\text{CHCl}_3$ )/ $\text{cm}^{-1}$  3011, 2934, 2218, 1598, 1512, 1431, 1274, 1139, 853;  $\delta_{\text{H}}$  (400 MHz;  $\text{CDCl}_3$ ) 7.27 (1H, d,  $J$  16.6,  $\text{ArCH}=\text{CH}$ ), 7.02 (1H, dd,  $J$  8.3, 1.9, ArH-6), 6.95 (1H, d,  $J$  1.9, ArH-2), 6.84 (1H, d,  $J$  8.3, ArH-5), 5.30 (1H, d,  $J$  16.6,  $\text{ArCH}=\text{CH}$ ), 3.85 (3H, s, Me), 1.00 (9H, s,  $\text{CMe}_3$ ), 0.12 (6H, s,  $\text{SiMe}_2$ );  $\delta_{\text{C}}$  (100 MHz;  $\text{CDCl}_3$ ) 153.7 (C), 150.1 (CH), 145.4 (C), 126.6 (C), 122.5 (CH), 118.8 (CH), 118.6 (C), 111.7 (CH), 93.4 (CH), 55.4 (Me), 25.6 (Me), 18.6 (C), -5.0 (Me);  $m/z$  ( $\text{ESI}^+$ ) 312 ( $\text{MNa}^+$ , 100%), 290 ( $\text{MH}^+$ , 48 %).

### **Methyl 2-(3-*tert*-butyldimethylsiloxy-4-methoxystyryl)-5-methyloxazole-4-carboxylate **6a****

To a solution of nitrile **9a** (250 mg, 0.86 mmol) and dirhodium tetraacetate (9.50 mg, 0.02 mmol, 2.50 mol%) in dichloromethane (4 mL) heated to reflux was added dropwise a solution of methyl 2-diazo-3-oxobutanoate (246 mg, 1.73 mmol) in dichloromethane (1 mL)

over a period of 16 h. After removal of the solvent under reduced pressure, purification by chromatography (eluting with ethyl acetate/light petroleum 1/5) gave the *title compound 6a* as a light yellow solid (143 mg, 41%); data identical to previous sample.

**(E)-3-(3,4-Dimethoxyphenyl)acrylonitrile 9b**

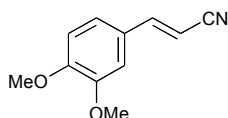

1,8-Diazabicyclo[5.4.0]undec-7-ene (3.60 mL, 24.2 mmol) and amide **4b** (1.0 g, 4.83 mmol) were dissolved in dichloromethane (20 mL) and stirred for 10 min at room temperature. Ethyl dichlorophosphate (1.72 mL, 14.5 mmol) was added and the mixture heated to reflux for 1 h. A solution of saturated aqueous ammonium chloride (10 mL) was added and the mixture stirred for further 10 min. The layers were separated, the aqueous extracted with dichloromethane (20 mL). The combined organic layers were washed with brine (20 mL), dried (MgSO<sub>4</sub>) and the solvent removed under reduced pressure. Chromatography (light petroleum/ethyl acetate 3/1) gave the *title compound 9b* as a colourless solid (500 mg, 55%),  $R_f = 0.57$  (light petroleum: ethyl acetate 1:1); mp 97-99 °C; (Found: C, 69.7; H, 5.8; N, 7.3. C<sub>11</sub>H<sub>11</sub>NO<sub>2</sub> requires C, 69.8; H, 5.9; N, 7.4%); (Found: MH<sup>+</sup>, 190.0862. C<sub>11</sub>H<sub>12</sub>NO<sub>2</sub> requires 190.0863);  $\nu_{\max}$  (CHCl<sub>3</sub>)/cm<sup>-1</sup> 3011, 2218, 1619, 1514, 1465, 1272, 1142, 1024;  $\delta_H$  (400 MHz; CDCl<sub>3</sub>) 7.30 (1H, d,  $J$  16.6, ArCH=CH), 7.02 (1H, dd,  $J$  8.3, 2.0, ArH-6), 6.93 (1H, d,  $J$  2.0, ArH-5), 6.86 (1H, d,  $J$  8.3, ArH-5), 5.71 (1H, d,  $J$  16.6, ArCH=CH), 3.90 (6H, s, OMe);  $\delta_C$  (100 MHz; CDCl<sub>3</sub>) 157.8 (C), 150.2 (CH), 149.3 (C), 126.5 (C), 122.0 (CH), 118.5 (CH), 111.0 (CH), 108.8 (CH), 93.5 (CH), 56.0 (Me), 55.9 (Me);  $m/z$  (ESI<sup>+</sup>) 212 (MNa<sup>+</sup>, 100%), 190 (MH<sup>+</sup>, 43%).

### **(E)-Methyl 2-(3,4-dimethoxystyryl)-5-methyloxazole-4-carboxylate 6b**

To a solution of nitrile **9b** (100 mg, 0.53 mmol) and dirhodium tetraacetate (5.80 mg, 0.01 mmol, 2.50 mol%) in dichloromethane (2 mL) heated to reflux was added dropwise a solution of methyl 2-diazo-3-oxobutanoate (151 mg, 1.06 mmol) in dichloromethane (0.8 mL) over a period of 16 h. After removal of the solvent under reduced pressure, purification by chromatography (eluting with ethyl acetate/light petroleum 1/2) gave the *title compound 6b* as a light yellow solid (37 mg, 23%); data identical to previous sample.

### **Methyl 2-(iodomethyl)-5-methyloxazole-4-carboxylate 10**

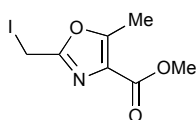

To a solution of iodoacetonitrile (9.40 g, 56.2 mmol) and dirhodium tetraacetate (310 mg, 0.70 mmol, 2.50 mol%) in dichloromethane (30 mL) heated to reflux was added dropwise a solution of methyl 2-diazo-3-oxobutanoate (4.0 g, 28.1 mmol) in dichloromethane (10 mL) over a period of 16 h. After the addition was complete the reaction mixture was heated to reflux for a further 2 h. After removal of the solvent under reduced pressure, purification by chromatography (eluting with ethyl acetate/light petroleum 1/4) gave the *title compound 10* as a yellow solid (6.0 g, 76%);  $R_f = 0.56$  (light petroleum: ethyl acetate 1:1); mp 81-83 °C; (Found:  $MH^+$ , 281.9616.  $C_7H_9INO_3$  requires 281.9627);  $\nu_{max}$  ( $CHCl_3$ )/ $cm^{-1}$  2954, 1727, 1618, 1424, 1353, 1103;  $\delta_H$  (400 MHz;  $CDCl_3$ ) 4.31 (2H, s,  $CH_2$ ), 3.88 (3H, s, OMe), 2.59 (3H, s, Me);  $\delta_C$  (100 MHz;  $CDCl_3$ ) 162.2 (C), 158.4 (C), 157.2 (C), 128.2 (C), 52.0 (Me), 12.0 (Me), -11.9 ( $CH_2$ );  $m/z$  ( $ESI^+$ ) 304 ( $MNa^+$ , 100%), 282 ( $MH^+$ , 23%).



### Methyl 2,5-dimethyloxazole-4-carboxylate **11**

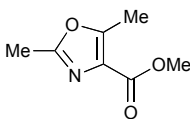

To a solution of dirhodium tetraacetate (310 mg, 0.7 mmol, 2.50 mol%) in acetonitrile (12 mL) heated to reflux was added dropwise a solution of methyl 2-diazo-3-oxobutanoate (4.0 g, 28.2 mmol) in acetonitrile (3 mL) over a period of 16 h. After the addition was complete the reaction mixture was heated to reflux for a further 4 h. After removal of the solvent under reduced pressure, purification by chromatography (eluting with ethyl acetate/ light petroleum 1/3 to 1:1) gave the *title compound 11* as a colourless solid (3.2 g, 73%);  $R_f = 0.27$  (light petroleum: ethyl acetate 1:1); mp 42-44 °C (lit.,<sup>3</sup> mp not given); (Found:  $M^+$ , 156.0655.  $C_7H_{10}NO_3$  requires 156.0655);  $\nu_{max}$  ( $CHCl_3$ )/ $cm^{-1}$  3005, 1715, 1627, 1442, 1353, 1193, 1102;  $\delta_H$  (400 MHz;  $CDCl_3$ ) 3.85 (3H, s, OMe), 2.54 (3H, s, Me), 2.40 (3H, s, Me);  $\delta_C$  (100 MHz;  $CDCl_3$ ) 162.7 (C), 159.4 (C), 156.1 (C), 127.0 (C), 51.7 (Me), 13.5 (Me), 11.7 (Me);  $m/z$  (ESI<sup>+</sup>) 178 ( $MNa^+$ , 100%), 156 ( $M^+$ , 38%).

### 2,5-Dimethyloxazole-4-carboxylic acid **12**

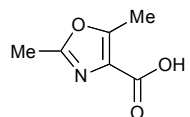

Ester **11** (0.80 g, 5.2 mmol) was dissolved in THF (20 mL). A solution of lithium hydroxide (0.62 g, 26 mmol) in water (5 mL) was added and the reaction mixture was stirred for 18 h at room temperature. The reaction mixture was diluted with aqueous citric acid (10%; 20 mL) and stirred for 10 min. The THF was removed *in vacuo*, ethyl acetate (90 mL) added, and the organic layer was separated, washed with water (30 mL) and brine (30 mL), dried ( $MgSO_4$ )

and the solvent evaporated under reduced pressure to give the *title compound 12* as a colourless solid (0.53 g, 72%); mp 191-194 °C (lit.,<sup>4</sup> mp 182.5-184.5); (Found:  $M^-$ , 140.0355  $C_6H_6NO_3$  requires 140.0353);  $\nu_{max}$  (solid)/ $cm^{-1}$  1703, 1634, 1328, 1223, 1099, 958;  $\delta_H$  (400 MHz;  $CDCl_3$ ) 2.50 (3H, s, Me), 2.36 (3H, s, Me);  $\delta_C$  (100 MHz;  $CDCl_3$ ) 163.3 (C), 158.8 (C), 155.3 (C), 127.4 (C), 13.3 (Me), 11.7 (Me);  $m/z$  (ESI) 140 ( $M^-$ , 29%).

### ***N*-Ethyl-2,5-dimethyloxazole-4-carboxamide 13**

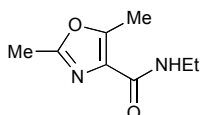

Carboxylic acid **12** (300 mg, 2.13 mmol) was dissolved in DMF (8 mL), diisopropylethylamine (1.77 mL, 10.7 mmol) and PyBOP (1.33 g, 2.55 mmol) were added and the mixture stirred at room temperature for 15 min. Ethylamine hydrochloride (208 mg, 2.55 mmol) was added and stirring continued at room temperature for 12 h. The mixture was diluted with diethyl ether (40 mL) and subsequently washed with water ( $2 \times 10$  mL) and brine (15 mL). After drying ( $MgSO_4$ ) and removal of the solvent under reduced pressure, purification by chromatography (eluent: ethyl acetate/light petroleum 1/1) gave the *title compound 13* as colourless solid (310 mg, 87%);  $R_f = 0.44$  (light petroleum: ethyl acetate 1:3); mp 32-33 °C; (Found:  $MH^+$ , 169.0960.  $C_8H_{13}N_2O_2$  requires 169.0972);  $\nu_{max}$  ( $CHCl_3$ )/ $cm^{-1}$  3419, 3009, 1656, 1526, 1442, 1332, 1138;  $\delta_H$  (400 MHz;  $CDCl_3$ ) 6.87 (1H, br, NH), 3.42-3.35 (2H, m,  $CH_2CH_3$ ), 2.56 (3H, s, Me), 2.37 (3H, s, Me), 1.18 (3H, t,  $J$  7.3,  $CH_2CH_3$ );  $\delta_C$  (100 MHz;  $CDCl_3$ ) 161.7 (C), 158.3 (C), 152.5 (C), 128.8 (C), 33.6 ( $CH_2$ ), 14.8 (Me), 13.6 (Me), 11.4 (Me);  $m/z$  (ESI<sup>+</sup>) 191 ( $MNa^+$ , 100%), 169 ( $MH^+$ , 38%).

### ***tert*-Butyl 2,5-dimethyloxazole-4-carboxylate **14****

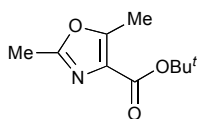

Di-*tert*-butyl dicarbonate (5.70 g, 25.5 mmol) and 4-dimethylaminopyridine (0.60 g, 5.10 mmol) were sequentially added to a solution of carboxylic acid **12** (2.40 g, 17.0 mmol) in *tert*-butanol (60 mL) at 35 °C and stirred for 48 h. The solvent was removed under reduced pressure, followed by chromatography (light petroleum/ethyl acetate 1/1) to give the *title compound* **14** (3.0 g, 90%) as a yellow solid (3.0 g, 90%);  $R_f = 0.75$  (light petroleum: ethyl acetate 1:3); mp 30-31 °C (lit.,<sup>4</sup> mp 33-35 °C); (Found:  $MNa^+$ , 220.0964.  $C_{10}H_{15}NO_3$  requires 220.0944);  $\nu_{max}$  ( $CHCl_3$ )/ $cm^{-1}$  2984, 1716, 1623, 1392, 1358, 1166, 1100;  $\delta_H$  (400 MHz;  $CDCl_3$ ) 2.49 (3H, s, Me), 2.39 (3H, s, Me), 1.53 (9H, s,  $CM_e_3$ );  $\delta_C$  (100 MHz;  $CDCl_3$ ) 161.5 (C), 159.0 (C), 155.0 (C), 128.3 (C), 81.4 (C), 28.1 (Me), 13.6 (Me), 11.8 (Me);  $m/z$  (ESI<sup>+</sup>) 220 ( $MNa^+$ , 100%).

### ***N*-Methoxy-*N*-methyl-2-(3,4-dimethoxystyryl)-5-methyloxazole-4-carboxamide**

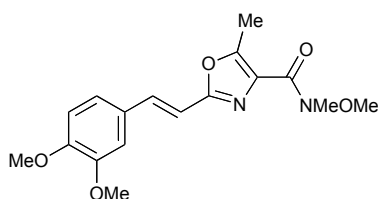

A solution of dimethylaluminum chloride (1 M; 8.25 mL, 8.25 mmol) in hexane was added over a 5 min period to a stirred suspension of *N,O*-dimethylhydroxylamine hydrochloride (805 mg, 8.25 mmol) in dichloromethane (20 mL) at 0 °C and the mixture stirred for 1 h at room temperature. A solution of ester **6b** (500 mg, 1.65 mmol) in dichloromethane (4 mL) was added dropwise over a period of 2 min and stirring continued. After completion of the

reaction, it was quenched with saturated aqueous sodium hydrogen carbonate (25 mL), diluted with dichloromethane (25 mL) and filtered through a short pad of Celite. The aqueous layer was extracted with dichloromethane (15 mL), the combined organic layers washed with brine (40 mL), dried (MgSO<sub>4</sub>) and the solvent removed under reduced pressure. Purification by chromatography using ethyl acetate/ light petroleum (2/1) gave the *title compound* as a light yellow solid (350 mg, 64%);  $R_f = 0.25$  (light petroleum: ethyl acetate 1:1); mp 85-87 °C; (Found: C, 61.4; H, 6.0; N, 8.3. C<sub>17</sub>H<sub>20</sub>N<sub>2</sub>O<sub>5</sub> requires C, 61.4; H, 6.1; N, 8.4%); (Found: MH<sup>+</sup>, 333.1458 C<sub>17</sub>H<sub>21</sub>N<sub>2</sub>O<sub>5</sub> requires 333.1445);  $\nu_{\max}$  (CHCl<sub>3</sub>)/cm<sup>-1</sup> 3011, 1730, 1640, 1512, 1465, 1266, 1140, 1025;  $\delta_{\text{H}}$  (400 MHz; CDCl<sub>3</sub>) 7.40 (1H, d,  $J$  16.4, ArCH=CH), 7.08 (1H, dd,  $J$  8.3, 1.9, ArH-6), 7.05 (1H, d,  $J$  1.9, ArH-2), 6.87 (1H, d,  $J$  8.3, ArH-5), 6.76 (1H, d,  $J$  16.4, ArCH=CH), 3.92 (3H, s, OMe), 3.91 (3H, s, OMe), 3.83 (3H, s, OMe), 3.44 (3H, s, NMe), 2.59 (3H, s, Me);  $\delta_{\text{C}}$  (100 MHz; CDCl<sub>3</sub>) 163.3 (C), 158.5 (C), 154.1 (C), 150.2 (C), 149.2 (C), 136.0 (CH), 130.1 (C), 128.4 (C), 121.2 (CH), 111.5 (CH), 111.2 (CH), 108.9 (CH), 67.9 (Me), 61.6 (Me), 55.9 (Me), 55.8 (Me), 12.0 (Me);  $m/z$  (ESI<sup>+</sup>) 355 (MNa<sup>+</sup>, 100%), 333 (MH<sup>+</sup>, 50 %).

### Methyl (*E*)-penta-2,4-dienoate

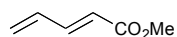

Acrolein (17.5 g, 310 mmol) and 4-dimethylaminopyridine (2.80 g, 23.0 mmol) were rapidly added to a solution of monomethyl malonate (37.0 g, 310 mmol) in pyridine (50 mL). The solution was warmed to 50 °C and stirred for 3 days at this temperature. The mixture was poured into water (250 mL) and extracted with ether (3 × 100 mL). The ether extract was washed with hydrochloric acid (2 M; 3 × 40 mL) and brine (80 mL), dried (MgSO<sub>4</sub>) and the solvent removed under reduced pressure to yield a light yellow oil (17.5 g, 50%). Further

purification was done by distillation to obtain a colourless liquid (8.50 g, 25%); bp 45 °C at 15 mmHg; (lit.,<sup>5</sup> bp 54 °C at 27 mmHg);  $\nu_{\max}$  (CHCl<sub>3</sub>)/cm<sup>-1</sup> 2953, 1711, 1646, 1601, 1363, 1312, 1149, 905;  $\delta_{\text{H}}$  (400 MHz; CDCl<sub>3</sub>) 7.13 (1H, dd, *J* 11.0, 15.4, CH<sub>2</sub>=CH=CH), 6.32 (1H, dt, *J* 17.0, 10.5, CH<sub>2</sub>=CH), 5.77 (1H, d, *J* 15.4, CHCO<sub>2</sub>Me), 5.46 (1H, d, *J* 17.0, CHH *E*), 5.34 (1H, d, *J* 10.0, CHHZ), 3.60 (3H, s, OMe);  $\delta_{\text{C}}$  (100 MHz; CDCl<sub>3</sub>) 166.7 (C), 144.4 (CH), 134.4 (CH), 125.2 (CH<sub>2</sub>), 121.5 (CH), 51.1 (Me).

### (*E*)-2,4-Pentadienol

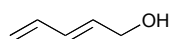

Lithium aluminum hydride (2.88 g, 76.0 mmol) was suspended in ether (50 mL) and cooled down to 0 °C. The above ester (8.50 g, 76.0 mmol) was dissolved in ether (10 mL) and added dropwise over a period of 1 h (*via* syringe pump) to the reaction mixture. The reaction was quenched by adding water (2.88 mL), aqueous sodium hydroxide (2 M; 2.88 mL), water (8.6 mL) and stirring continued for further 30 min. The mixture was poured through a short pad of Celite and diluted with ether (50 mL). The combined organic layers were dried (MgSO<sub>4</sub>) and the solvent removed under reduced pressure to give the title compound as a colourless liquid (5.20 g, 81%) used without any further purification for the next step; the spectroscopic data corresponded to literature values,<sup>6</sup>  $\nu_{\max}$  (CHCl<sub>3</sub>)/cm<sup>-1</sup> 3616, 3444, 2873, 2254, 1824, 1731, 1606, 1455, 1377, 1083, 994, 902;  $\delta_{\text{H}}$  (400 MHz; CDCl<sub>3</sub>) 6.25 (2H, m, CH<sub>2</sub>=CH=CH), 5.74 (1H, dt, *J* 14.7, 5.7, CH=CH<sub>2</sub>OH), 5.13 (1H, d, *J* 16.4, CHH *E*), 5.01 (1H, d, *J* 9.6, CHHZ), 4.07 (2H, m, CH<sub>2</sub>OH);  $\delta_{\text{C}}$  (100 MHz; CDCl<sub>3</sub>) 136.2 (CH), 132.5 (CH), 131.2 (CH), 116.9 (CH<sub>2</sub>), 62.3 (CH<sub>2</sub>).

### (E)-5-Bromo-1,3-pentadiene

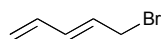

The above alcohol (7.10 g, 84.0 mmol) was dissolved in ether (60 mL) and cooled to 0 °C. Phosphorus tribromide (27.3 g, 101 mmol) was added dropwise over 30 min (*via* syringe pump) and stirring continued at this temperature for further 30 min. The mixture was poured into ice–water (100 mL) and the aqueous layer extracted with ether (3 × 50 mL). The combined organic layers were washed with water (80 mL), saturated aqueous sodium hydrogen carbonate (80 mL), brine (80 mL) and dried (MgSO<sub>4</sub>). The solvent was removed in *vacuo* and further purification by distillation gave a colourless liquid (7.20 g, 58%); bp 35 °C at 5.2 mmHg, (lit.,<sup>6</sup> bp 54–55 °C at 34 mmHg);  $\nu_{\max}$  (CHCl<sub>3</sub>)/cm<sup>-1</sup> 2971, 1831, 1600, 1292, 1114, 1002, 949, 913;  $\delta_{\text{H}}$  (400 MHz; CDCl<sub>3</sub>) 6.30 (2H, m, CH<sub>2</sub>=CH=CH), 5.90 (1H, m, CH=CH<sub>2</sub>Br), 5.25 (1H, d, *J* 13.7, CHH *E*), 5.14 (1H, d, *J* 10.0, CHH *Z*), 4.00 (2H, d, *J* 7.9, CH<sub>2</sub>Br);  $\delta_{\text{C}}$  (100 MHz; CDCl<sub>3</sub>) 135.3 (CH), 135.0 (CH), 129.0 (CH), 119.2 (CH<sub>2</sub>), 32.7 (CH<sub>2</sub>).

### (E)-2,4-Pentadienylamine

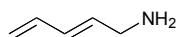

The above bromide (6.80 g, 46.0 mmol) was dissolved in DMSO (80 mL) and sodium azide (4.50 g, 69.0 mmol) added in one portion at room temperature and the mixture stirred for 1.5 h. The reaction was diluted with water (100 mL) and extracted with ether (3 × 100 mL). The combined organic layers were washed with water (80 mL) and brine (80 mL), dried (MgSO<sub>4</sub>) and the solvent removed under reduced pressure. The azide (4.80 g, 96%) was obtained as a yellow liquid and used without further purification.

Lithium aluminum hydride (1.20 g, 32.0 mmol) was suspended in ether (70 mL) and cooled down to 0 °C. The azide (4.60 g, 42.0 mmol) was dissolved in ether (10 mL) and added dropwise over a period of 30 min (*via* syringe pump) to the reaction mixture. Stirring was continued for further 30 min at 0 °C. The reaction was then quenched by adding water (1.20 mL), aqueous sodium hydroxide (2 M; 1.20 mL), water (3.60 mL) and stirred for 20 min. The mixture was poured through a short pad of Celite and diluted with ether (30 mL). The combined organic layers were dried (MgSO<sub>4</sub>) and the solvent removed under reduced pressure to give a yellow liquid (2.80 g, 80%). After distillation (*E*)-2,4-pentadienylamine was obtained as colourless oil (1.50 g, 43%); bp 30-33 °C at 8 mmHg; (lit.,<sup>7</sup> bp 43-45 °C at 40 mmHg);  $\nu_{\max}$  (CHCl<sub>3</sub>)/cm<sup>-1</sup> 3616, 3444, 2873, 2253, 1824, 1731, 1606, 1455, 1377, 1083, 994, 902;  $\delta_{\text{H}}$  (400 MHz; CDCl<sub>3</sub>) 6.30 (1H, dt, *J* 16.9, 10.3, CH<sub>2</sub>=CH), 6.09 (1H, dd, *J* 15.2, 10.5, CH<sub>2</sub>=CHCH), 5.77 (1H, dt, *J* 15.2, 5.6, CH=CH<sub>2</sub>NH<sub>2</sub>), 5.08 (1H, d, *J* 16.9, CHH *E*), 4.95 (1H, d, *J* 10.0, CHH *Z*), 3.15 (2H, d, *J* 5.6, CH<sub>2</sub>NH<sub>2</sub>), 2.0 (2H, br, NH<sub>2</sub>);  $\delta_{\text{C}}$  (100 MHz; CDCl<sub>3</sub>) 137.0 (CH), 136.9 (CH), 129.0 (CH), 115.4 (CH<sub>2</sub>), 43.1 (CH<sub>2</sub>).

**Methyl 2-(2-(2-(3-hydroxy-4-methoxystyryl)-5-methyloxazol-4-yl)-2-oxoethyl)-5-methyloxazole-4-carboxylate 20**

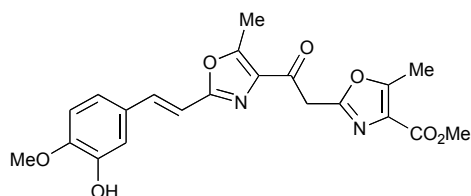

Ester **15** (300 mg, 0.57 mmol) was dissolved in THF (5 mL), cooled to 0 °C and triethylamine trihydrofluoride (276  $\mu$ L, 1.71 mmol) was added dropwise over a period of 5 min. The mixture was stirred at 0 °C for 3 h before an aqueous solution of saturated ammonium chloride (5 mL) was added and the mixture warmed to room temperature. The

THF was removed under reduced pressure and the aqueous extracted with ethyl acetate ( $2 \times 10$  mL). The combined organic layers were washed with brine (10 mL), dried ( $\text{MgSO}_4$ ) and evaporated to give the *title compound 20* as a light yellow solid (157 mg, 65%) used without further purification; mp 71-73 °C; (Found:  $\text{MH}^+$ , 413.1346.  $\text{C}_{21}\text{H}_{21}\text{N}_2\text{O}_7$  requires 413.1343);  $\nu_{\text{max}}$  ( $\text{CHCl}_3$ )/ $\text{cm}^{-1}$  3544, 3011, 1719, 1588, 1511, 1442, 1353, 1281, 1106;  $\delta_{\text{H}}$  (400 MHz;  $\text{CDCl}_3$ ) 7.38 (1H, d,  $J$  16.3,  $\text{ArCH}=\text{CH}$ ), 7.12 (1H, d,  $J$  2.0, ArH-2), 7.00 (1H, dd,  $J$  8.3, 2.0, ArH-6), 6.84 (1H, d,  $J$  8.3, ArH-5), 6.69 (1H, d,  $J$  16.3,  $\text{ArCH}=\text{CH}$ ), 5.9 (1H, br, OH), 4.47 (2H, s,  $\text{CH}_2$ ), 3.90 (3H, s, OMe), 3.88 (3H, s, OMe), 2.63 (3H, s, Me), 2.62 (3H, s, Me);  $\delta_{\text{C}}$  (100 MHz;  $\text{CDCl}_3$ ) 189.3 (C), 162.7 (C), 159.1 (C), 157.2 (C), 156.5 (C), 155.4 (C), 148.0 (C), 145.9 (C), 137.1 (CH), 134.3 (C), 128.7 (C), 127.6 (C), 120.6 (CH), 112.4 (CH), 111.0 (CH), 110.6 (CH), 56.0 (Me), 51.8 (Me), 39.5 ( $\text{CH}_2$ ), 12.3 (Me), 11.9 (Me);  $m/z$  ( $\text{ESI}^+$ ) 435 ( $\text{MNa}^+$ , 100%), 413 ( $\text{MH}^+$ , 42%).

**Methyl 2-(2-(2-(3-hydroxy-4-methoxystyryl)-5-methyloxazol-4-yl)-2-oxo-1-methylethyl)-5-methyloxazole-4-carboxylate 21**

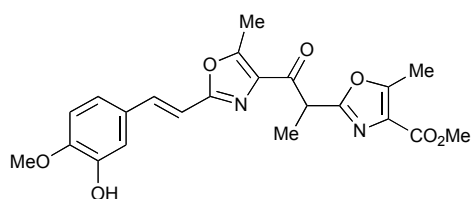

Phenol **20** (15.0 mg, 35.0  $\mu\text{mol}$ ) was dissolved in DMF (0.5 mL) and cooled to 0 °C. Subsequently potassium carbonate (15.0 mg, 110  $\mu\text{mol}$ ) and iodomethane (6.60  $\mu\text{L}$ , 180  $\mu\text{mol}$ ) were added and the mixture stirred at this temperature for 30 min. Saturated aqueous ammonium chloride (5 mL) and ethyl acetate (20 mL) were added and the layers separated. The aqueous layer was extracted with ethyl acetate (10 mL) and the combined organic layers



washed with brine (15 mL), dried ( $\text{MgSO}_4$ ) and the solvent removed under reduced pressure.

Purification by chromatography (eluent light petroleum/ethyl acetate 1/1 + 0.5%

triethylamine) gave the *title compound* **21** as a colourless solid (6.5 mg, 42%);  $R_f = 0.22$

(light petroleum: ethyl acetate 1:1); mp 57-58 °C; (Found:  $\text{MH}^+$ , 427.1501.  $\text{C}_{22}\text{H}_{23}\text{N}_2\text{O}_7$

requires 427.1500;  $\nu_{\text{max}}$  ( $\text{CHCl}_3$ )/ $\text{cm}^{-1}$  3543, 3012, 1724, 1601, 1511, 1442, 1267, 1103;  $\delta_{\text{H}}$

(400 MHz;  $\text{CDCl}_3$ ) 7.38 (1H, d,  $J$  16.3,  $\text{ArCH}=\text{CH}$ ), 7.14 (1H, d,  $J$  2.0, ArH-2), 7.03 (1H, dd,

$J$  8.3, 2.0, ArH-6), 6.86 (1H, d,  $J$  8.3, ArH-5), 6.71 (1H, d,  $J$  16.3,  $\text{ArCH}=\text{CH}$ ), 5.0 (1H, q,  $J$

7.3,  $\text{CHMe}$ ), 3.93 (3H, s, OMe), 3.89 (3H, s, OMe), 2.70 (3H, s, Me), 2.62 (3H, s, Me), 1.69

(3H, d,  $J$  7.3,  $\text{CHMe}$ ); OH not observed;  $\delta_{\text{C}}$  (100 MHz;  $\text{CDCl}_3$ ) 193.1 (C), 162.8 (C), 160.8

(C), 158.9 (C), 156.9 (C), 156.1 (C), 147.9 (C), 145.9 (C), 137.0 (CH), 134.0 (C), 128.8 (C),

127.4 (C), 120.6 (CH), 112.4 (CH), 111.3 (CH), 110.7 (CH), 56.0 (Me), 51.8 (Me), 43.1

(CH), 14.7 (Me), 12.8 (Me), 12.0 (Me);  $m/z$  ( $\text{ESI}^+$ ) 449 ( $\text{MNa}^+$ , 87%), 427 ( $\text{MH}^+$ , 65%).

### X-Ray crystal structure of 2-(3,4-dimethoxystyryl)-5-methyloxazole-4-carbaldehyde 8b

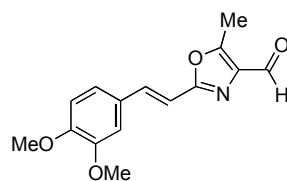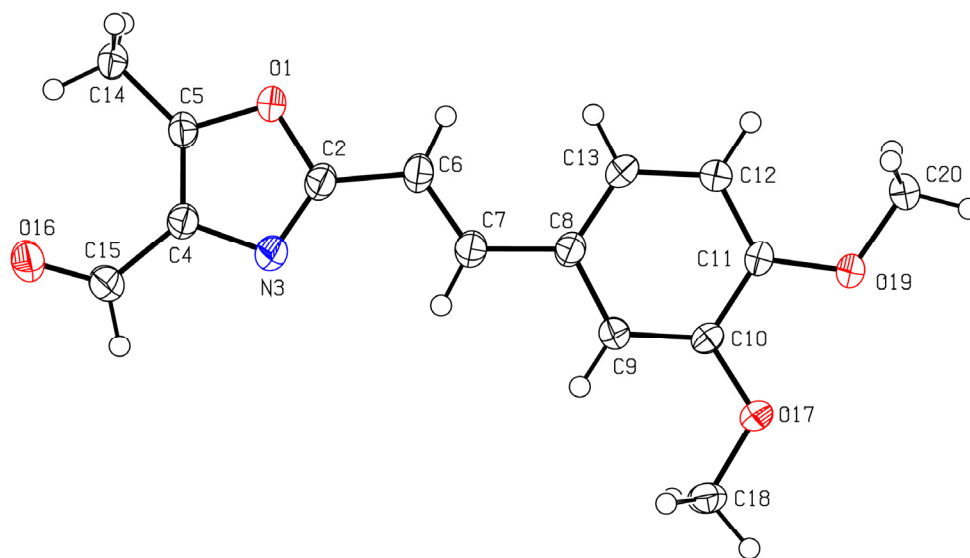

ESI19

**(E)-3-(3-(tert-Butyldimethylsilyloxy-4-methoxyphenyl)acrylamide 4a**

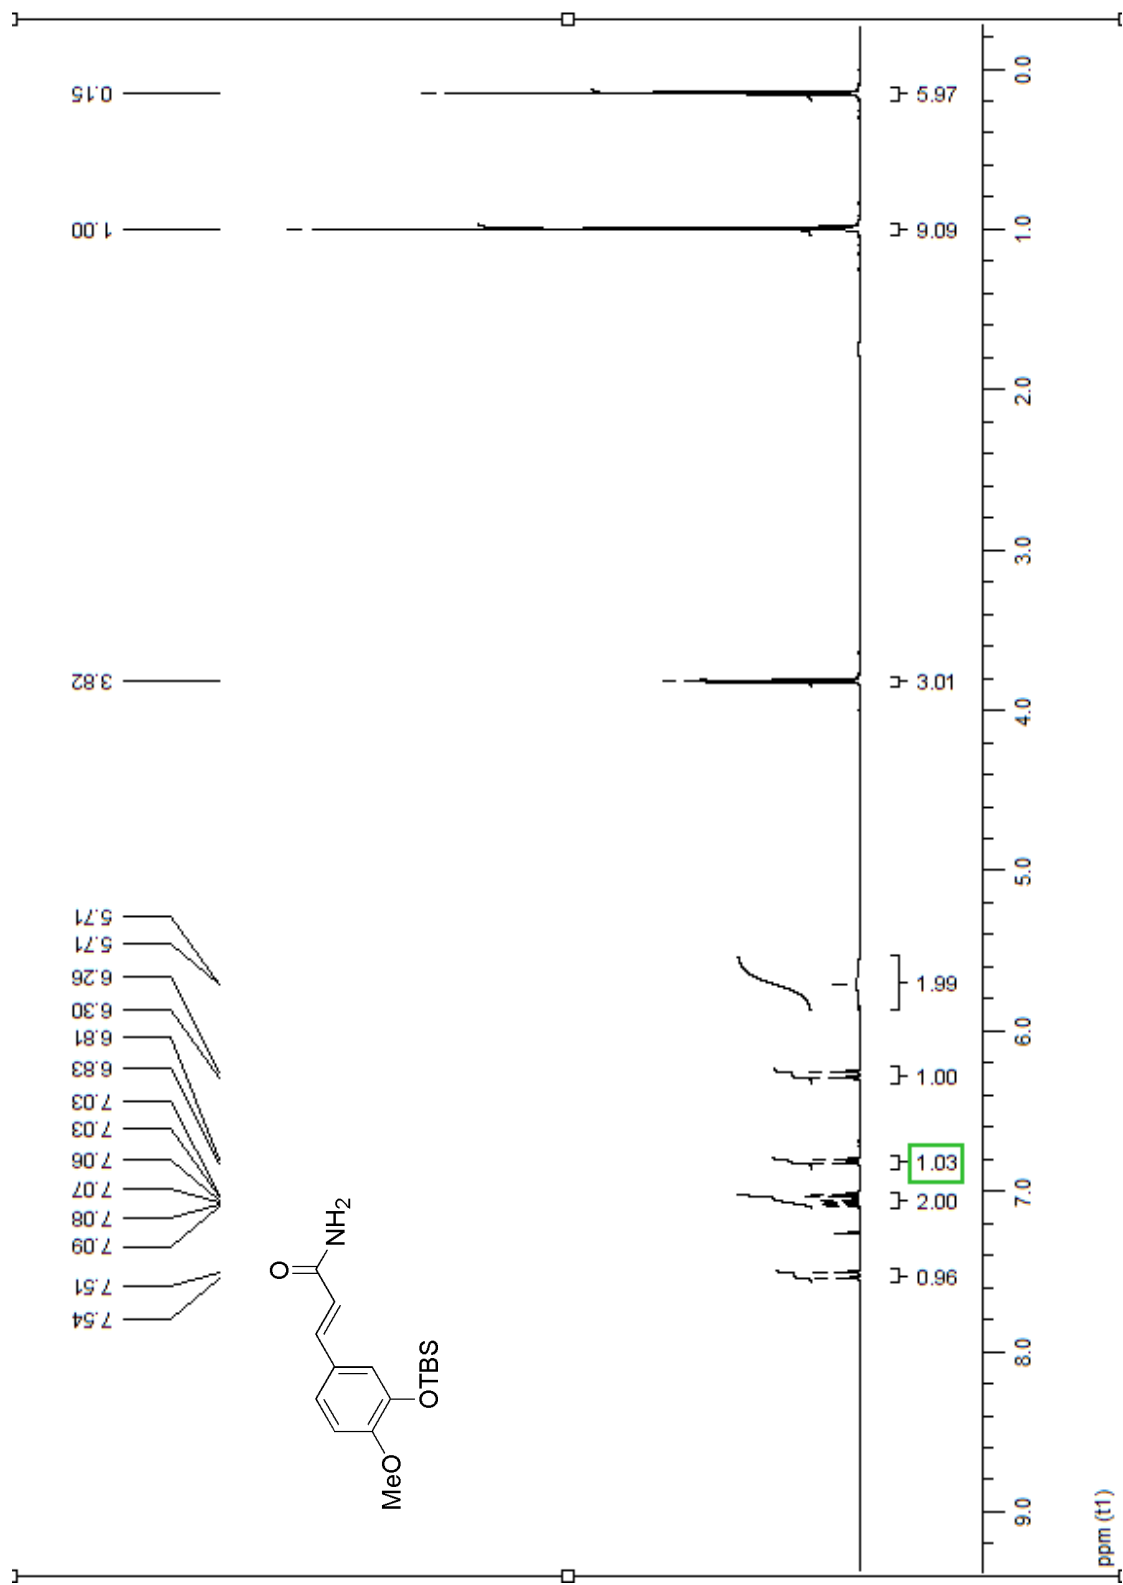

ESI20

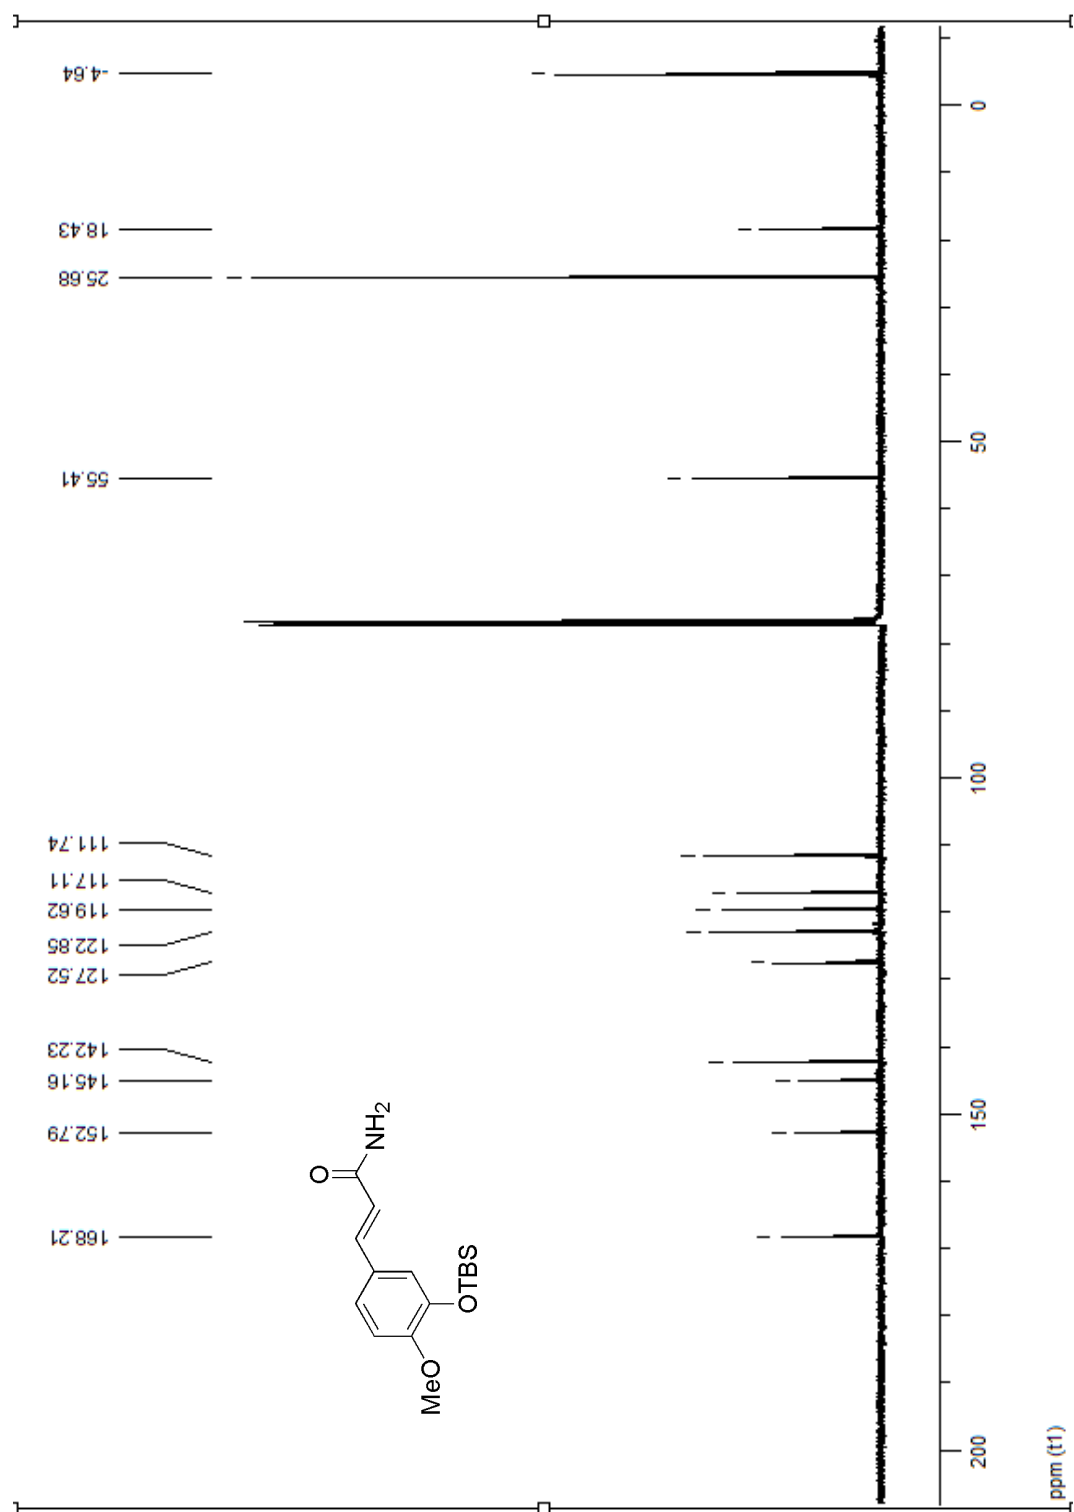



ESI22

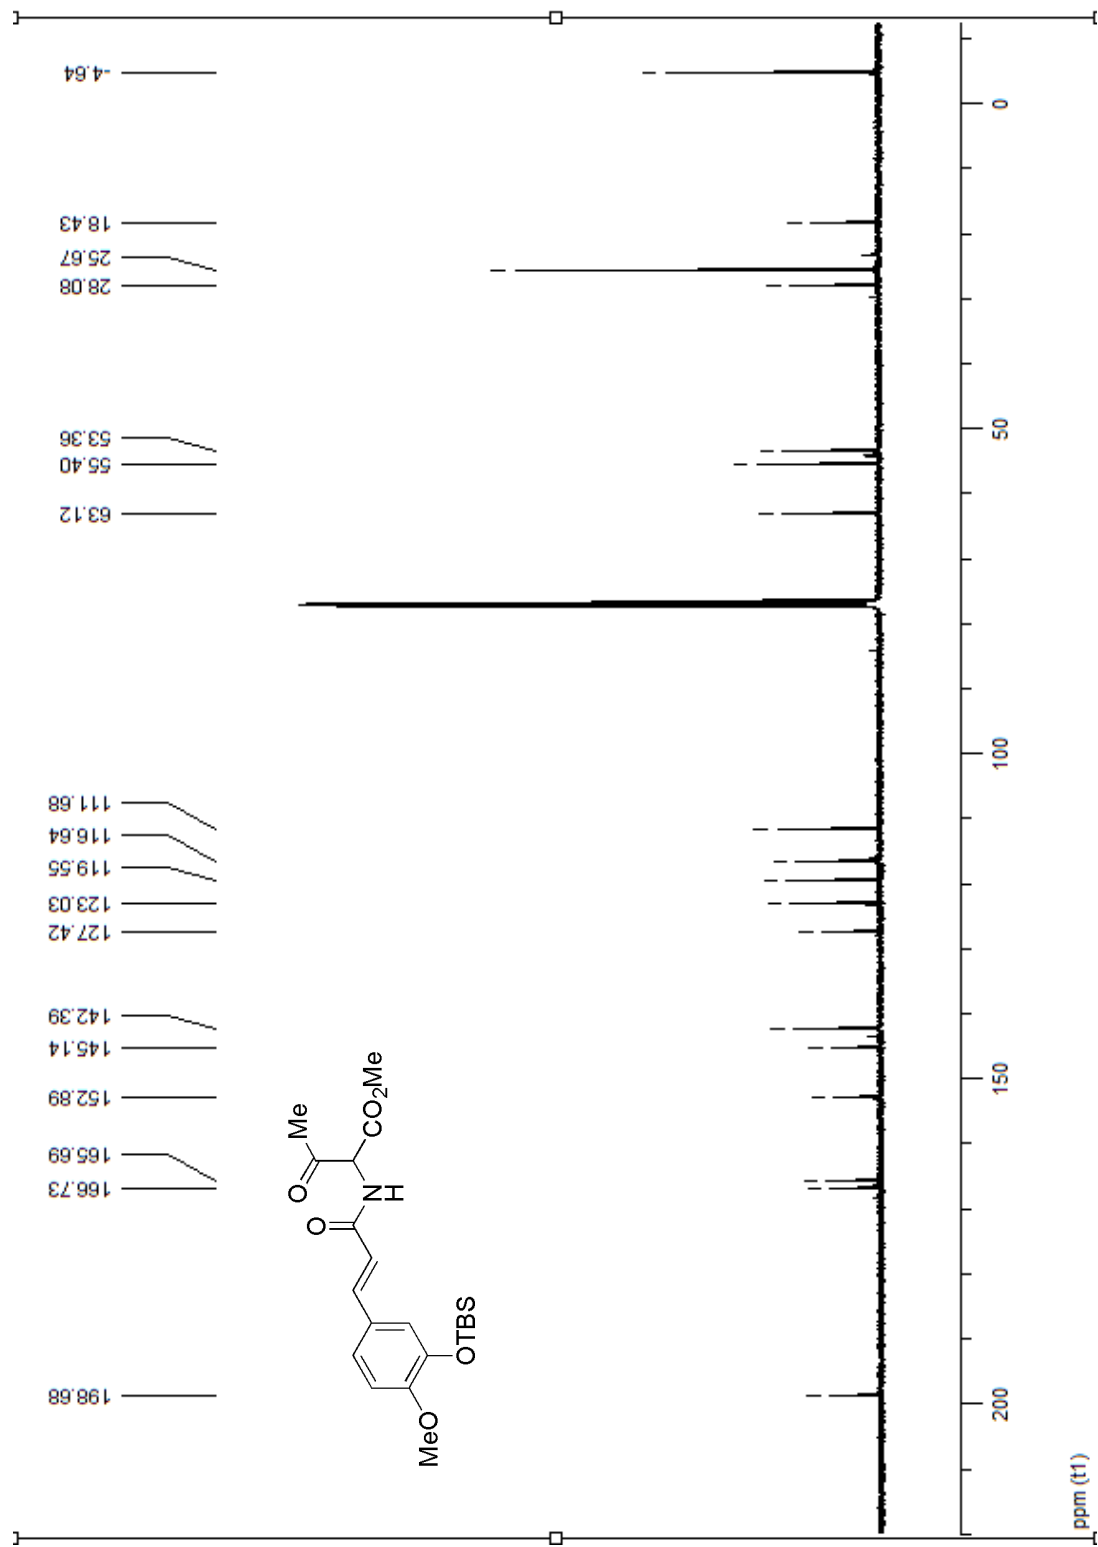

ESI23

Methyl 2-(3-*tert*-butyldimethylsilyloxy-4-methoxystyryl)-5-methyloxazole-4-carboxylate 6a

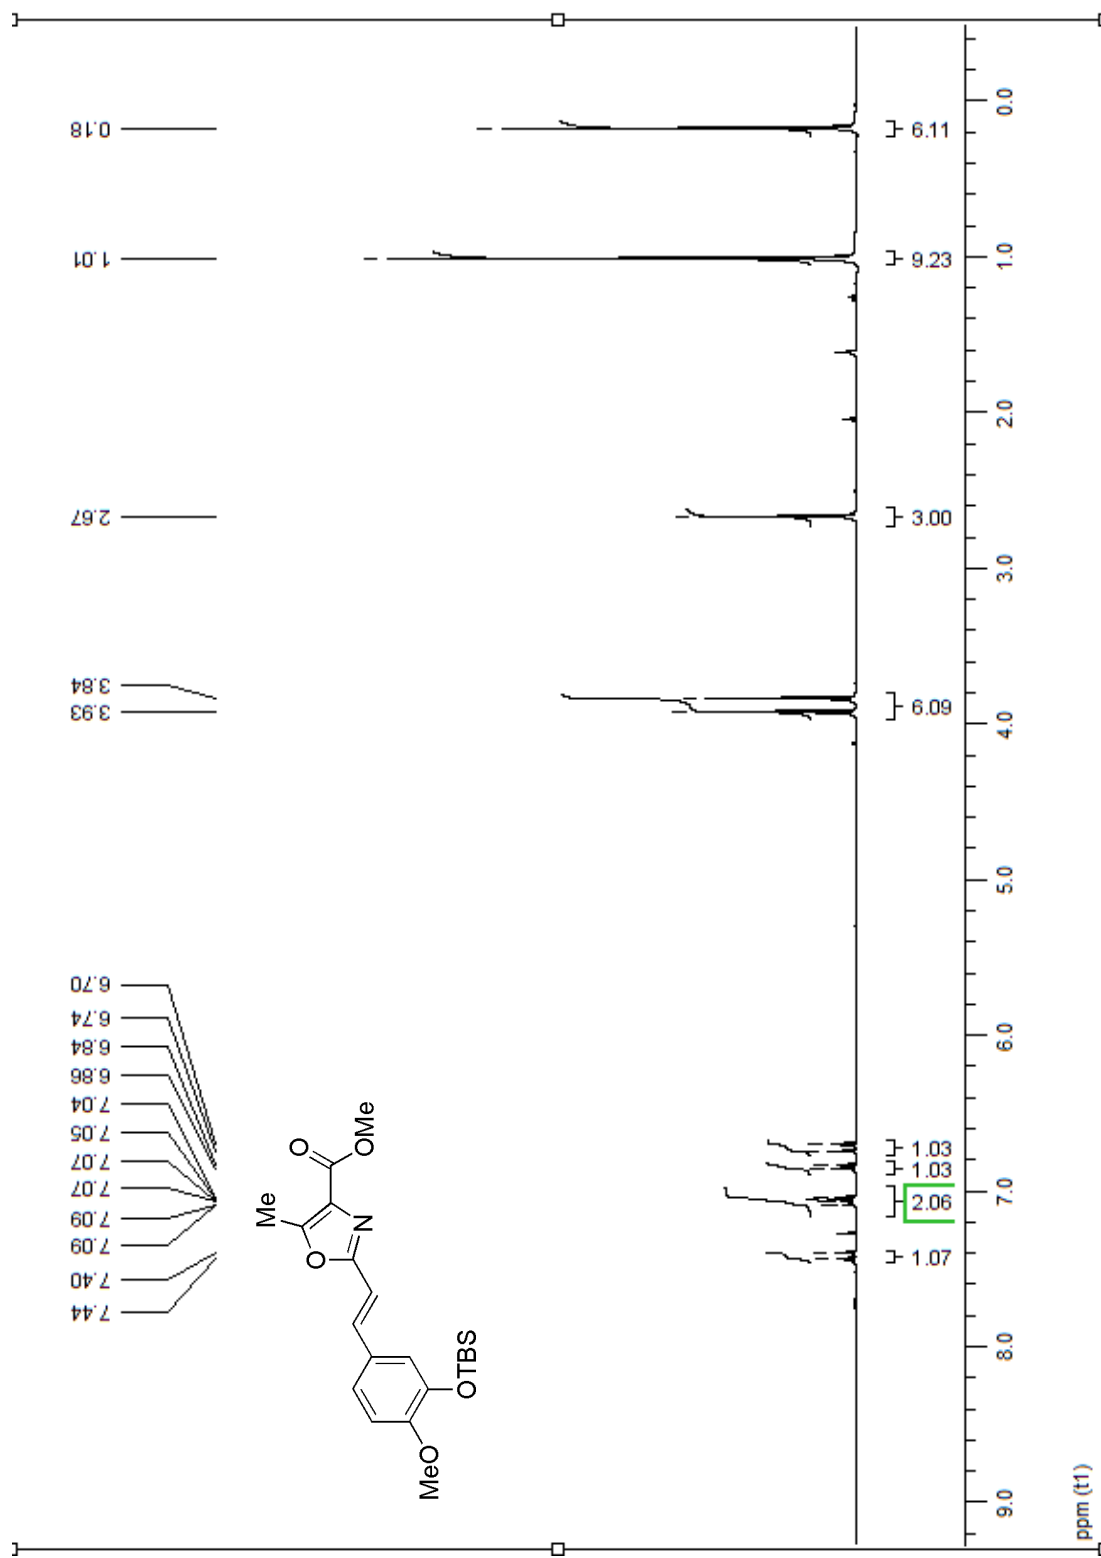

ESI24

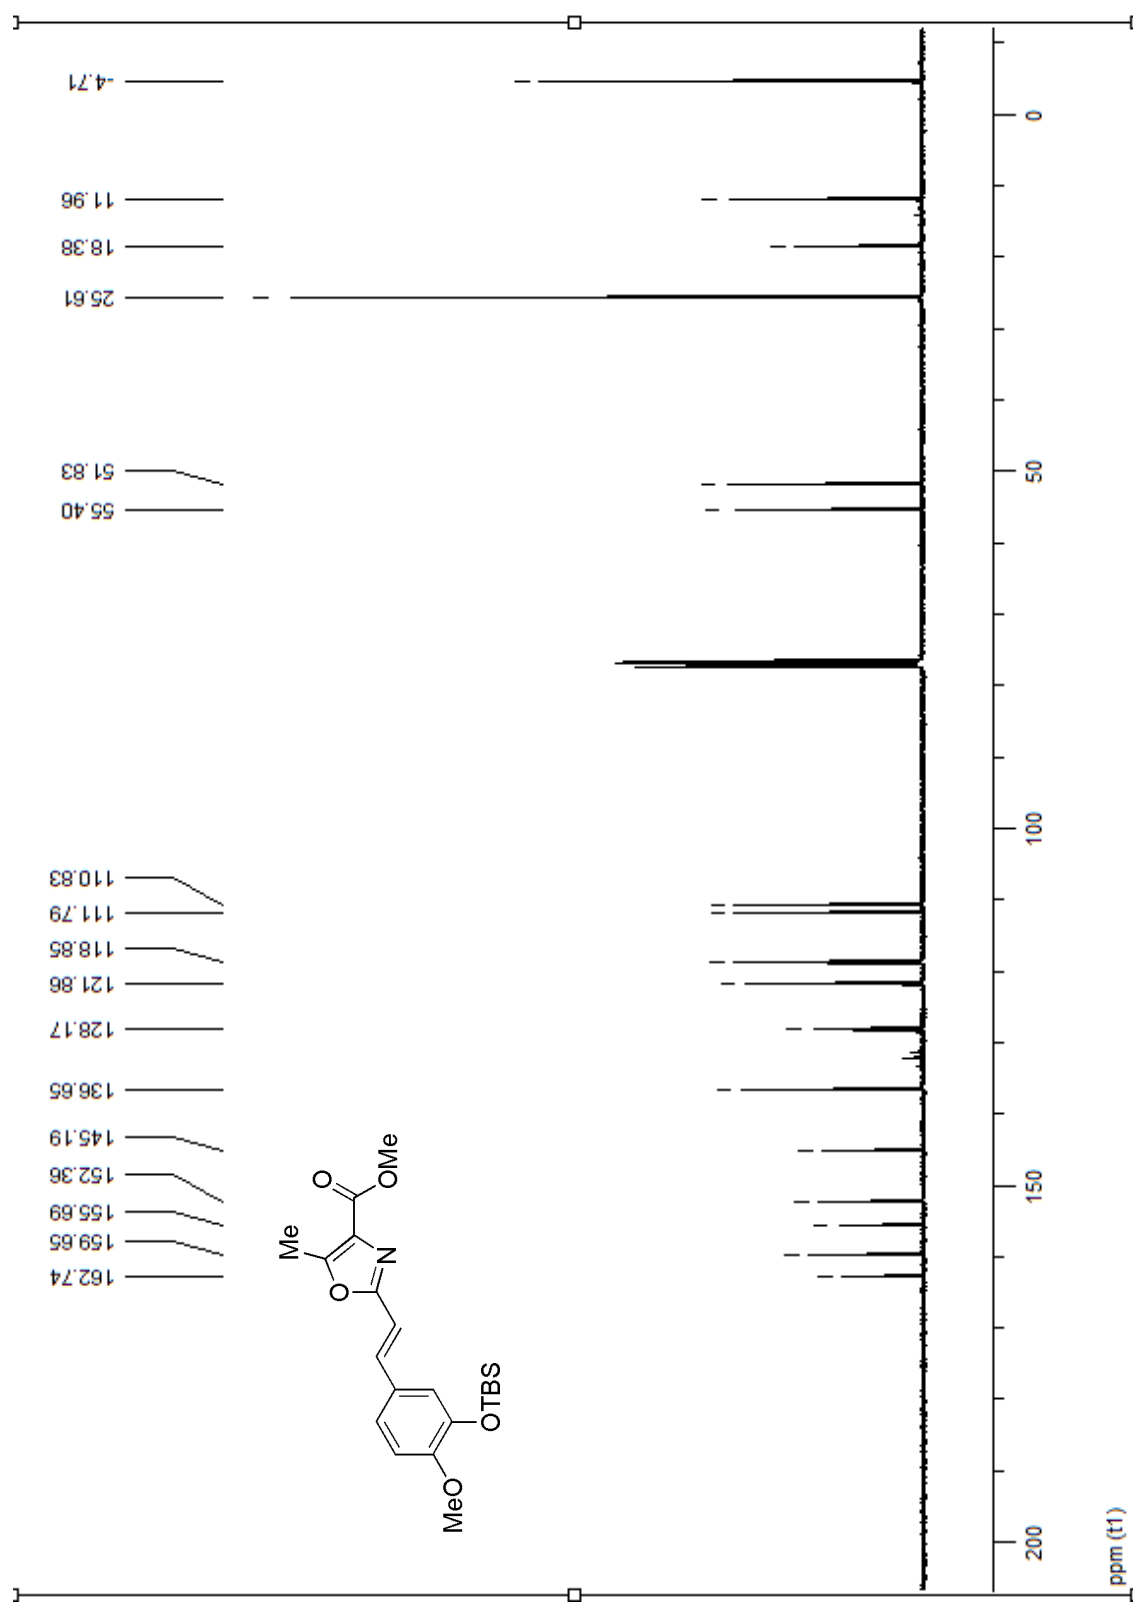



ESI25

[2-(3-*tert*-Butyldimethylsilyloxy-4-methoxystyryl)-5-methoxy-2-methyl-1H-imidazol-4-yl)methanol 7a

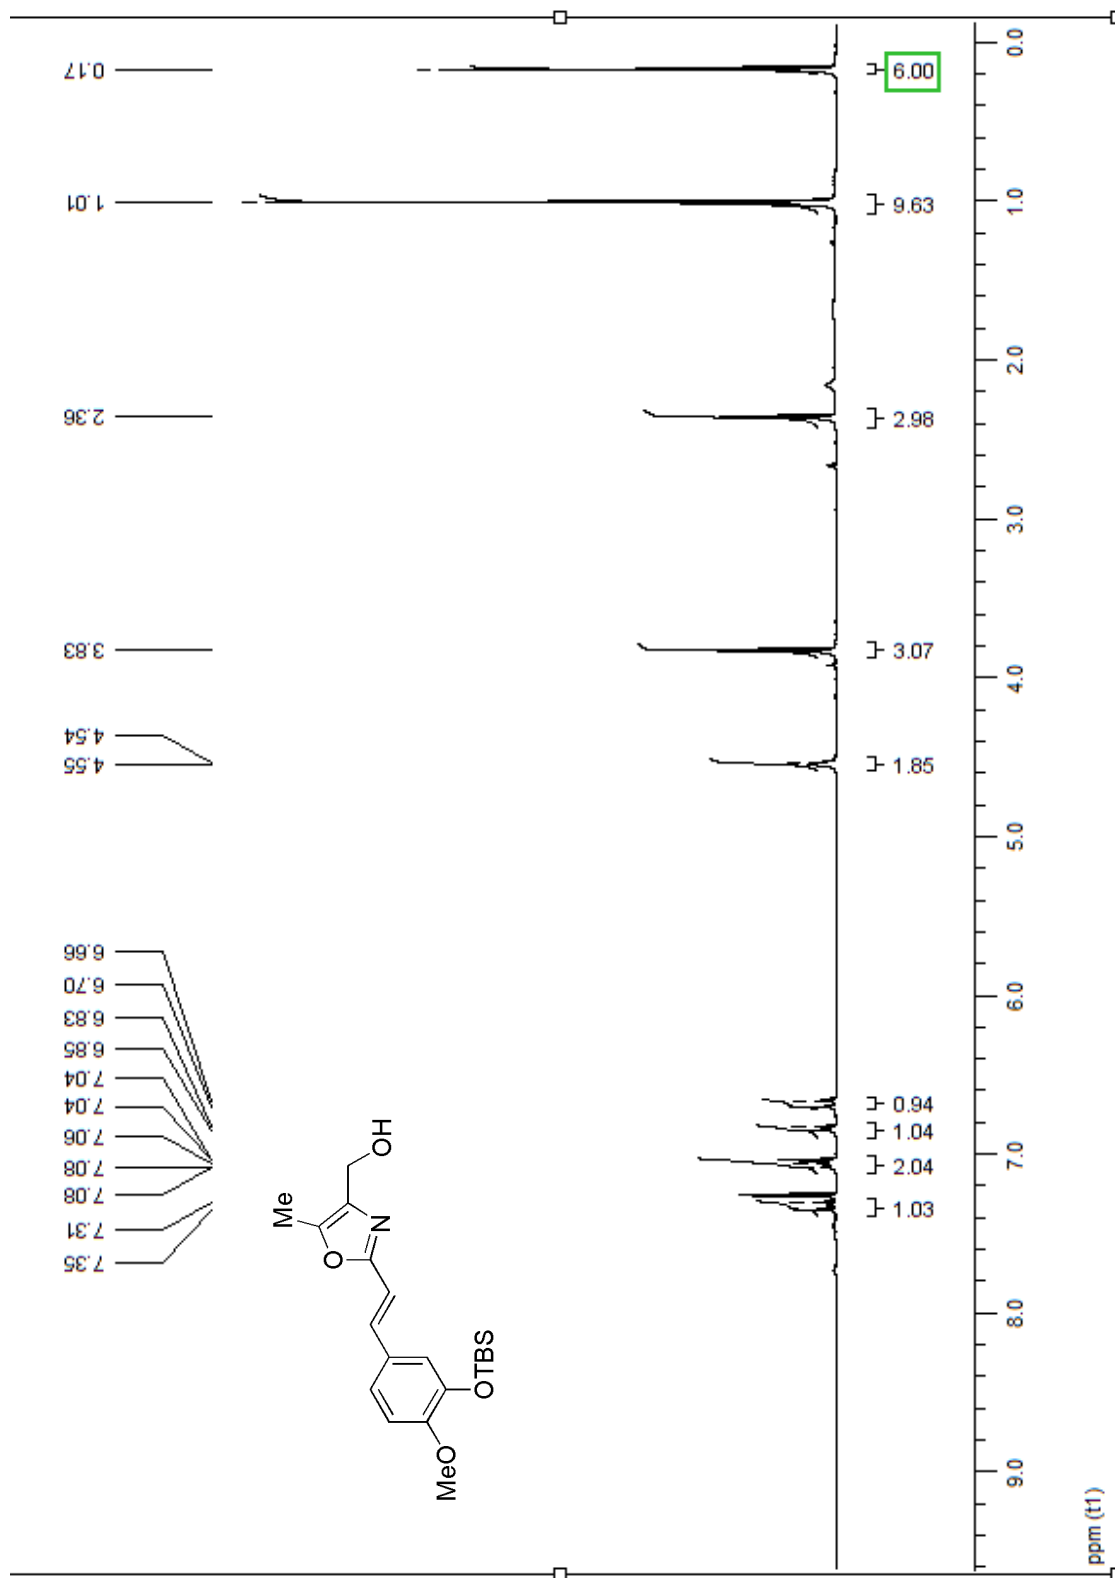

ESI26

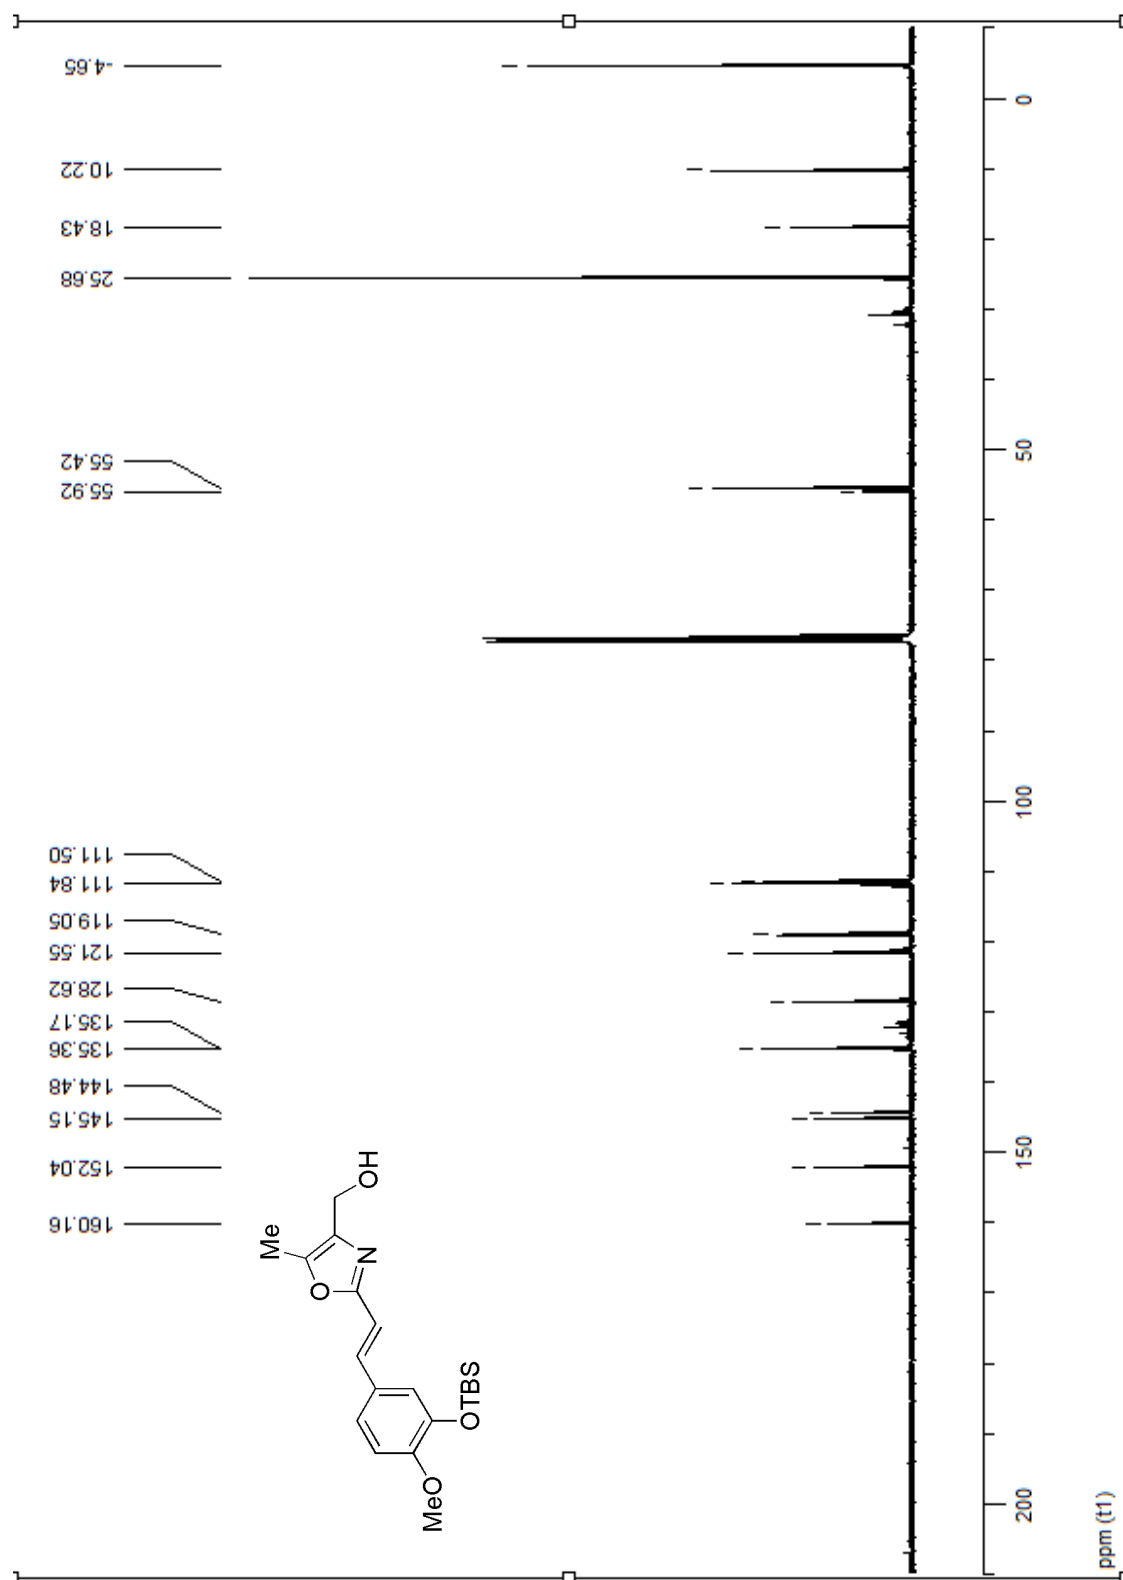

ESI27

2-(3-*tert*-Butyldimethylsilyloxy-4-methoxystyryl)-5-methyloxazole-4-carbaldehyde 8a

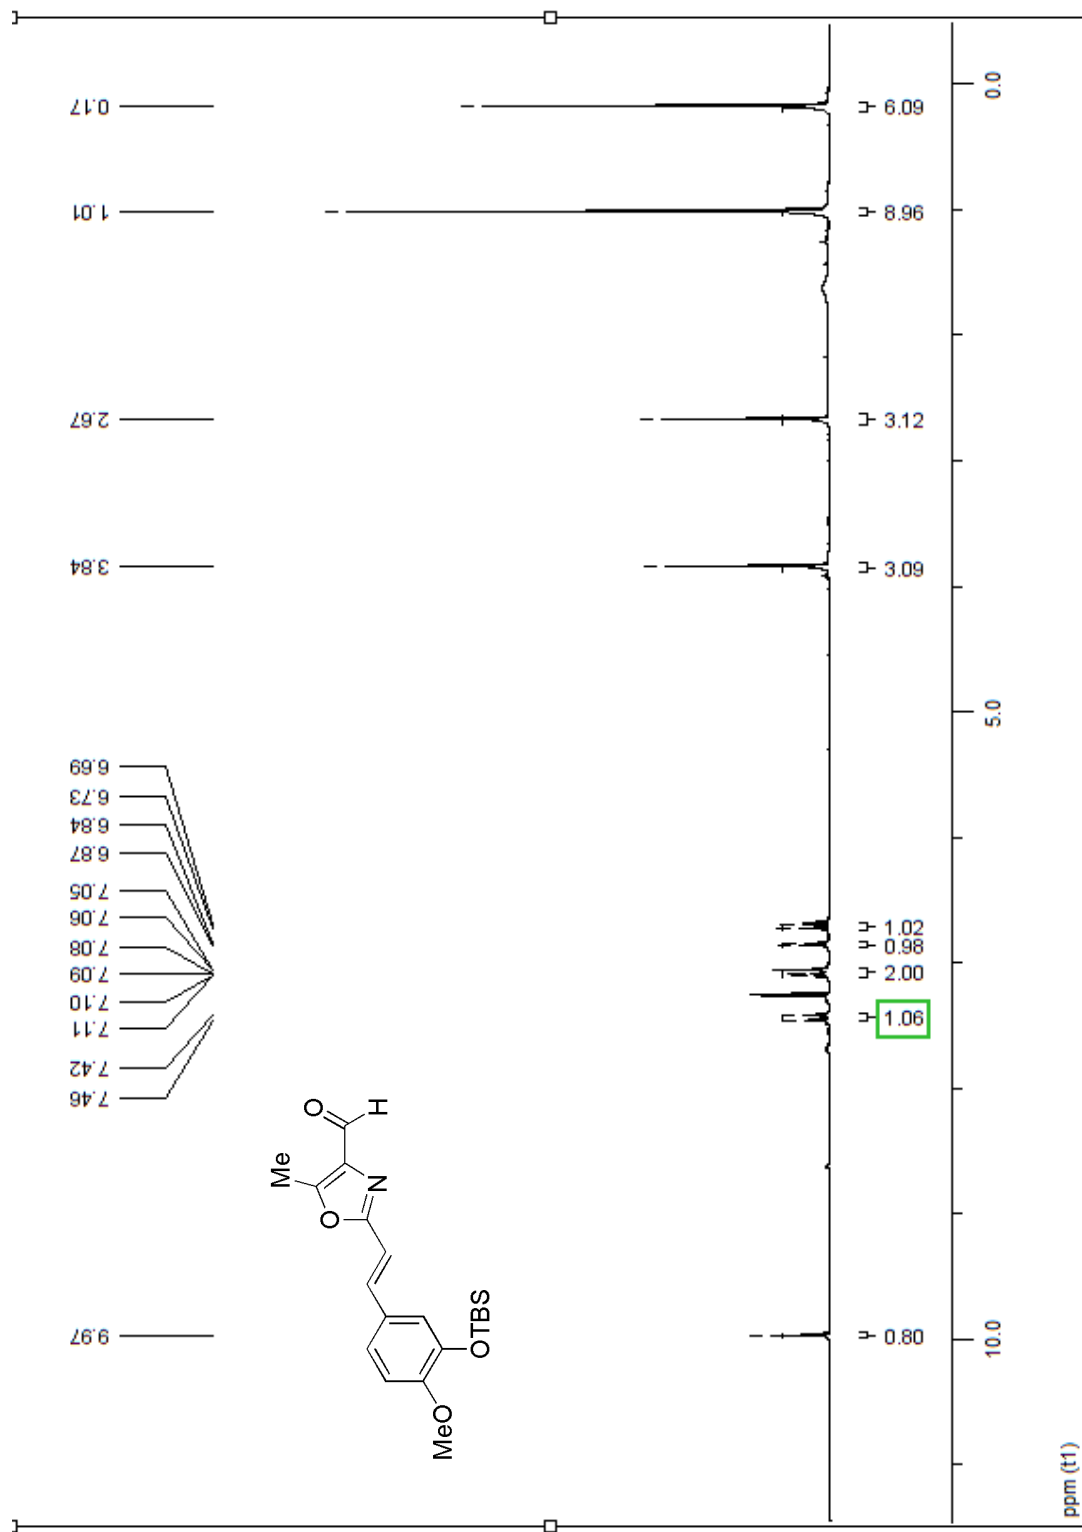

ESI28

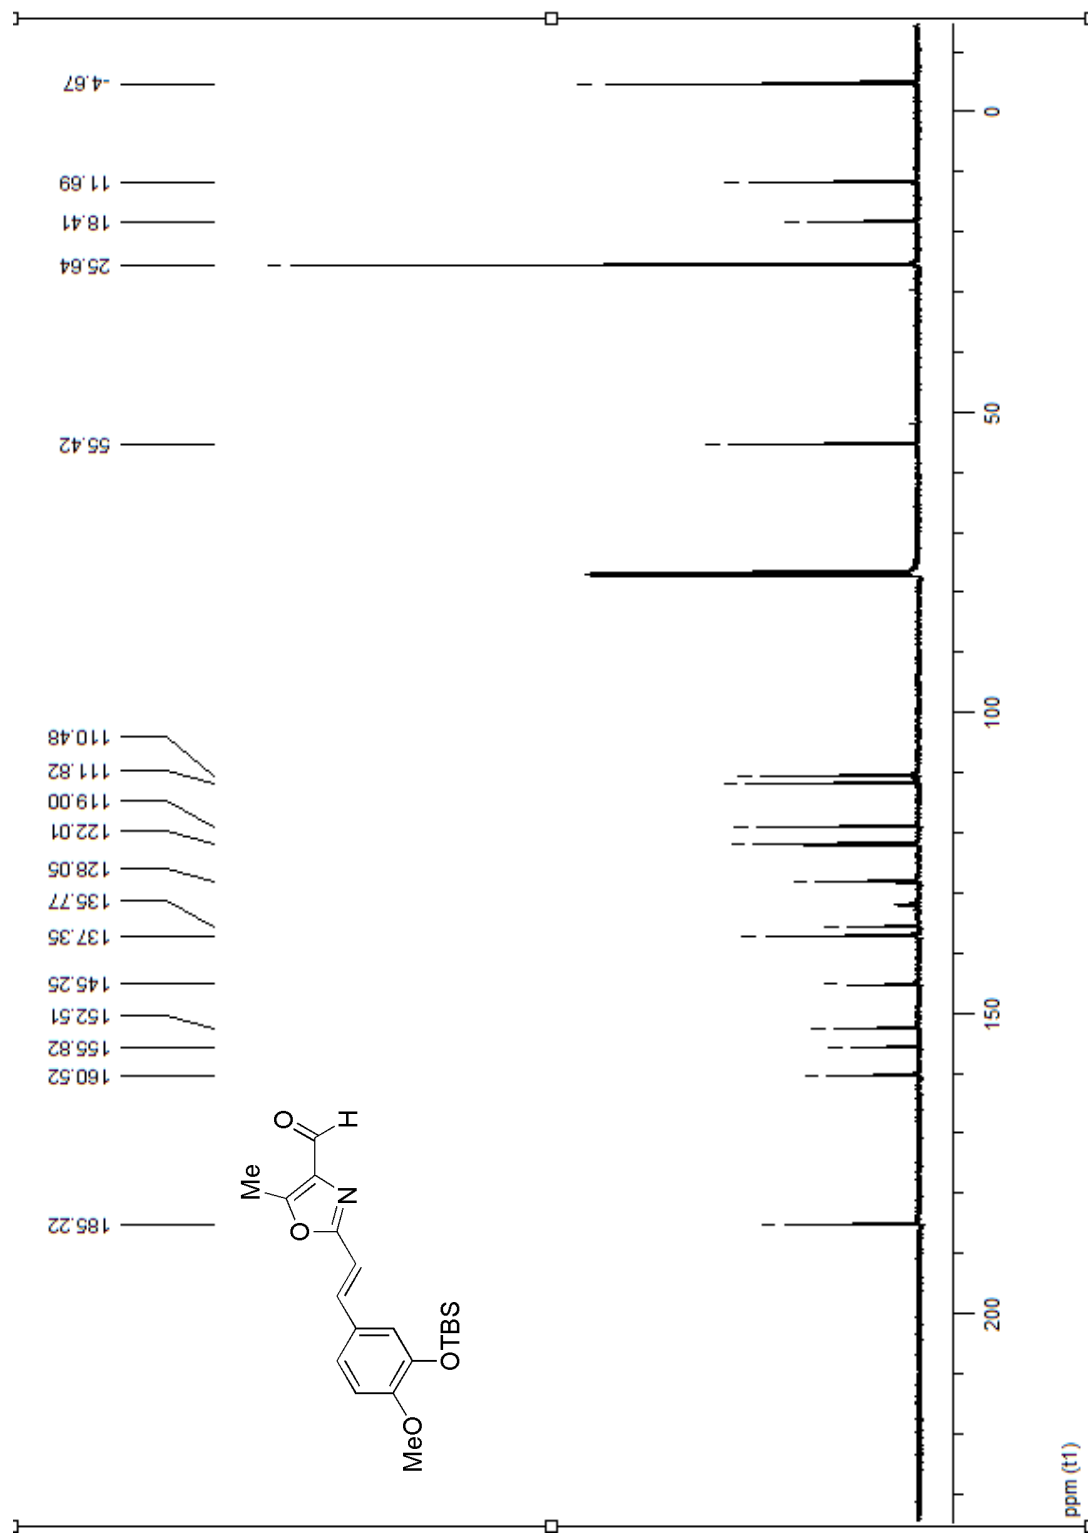

ESI29

**(E)-(3-*tert*-Butyldimethylsilyl-4-methoxyphenyl) acrylonitrile 9a**

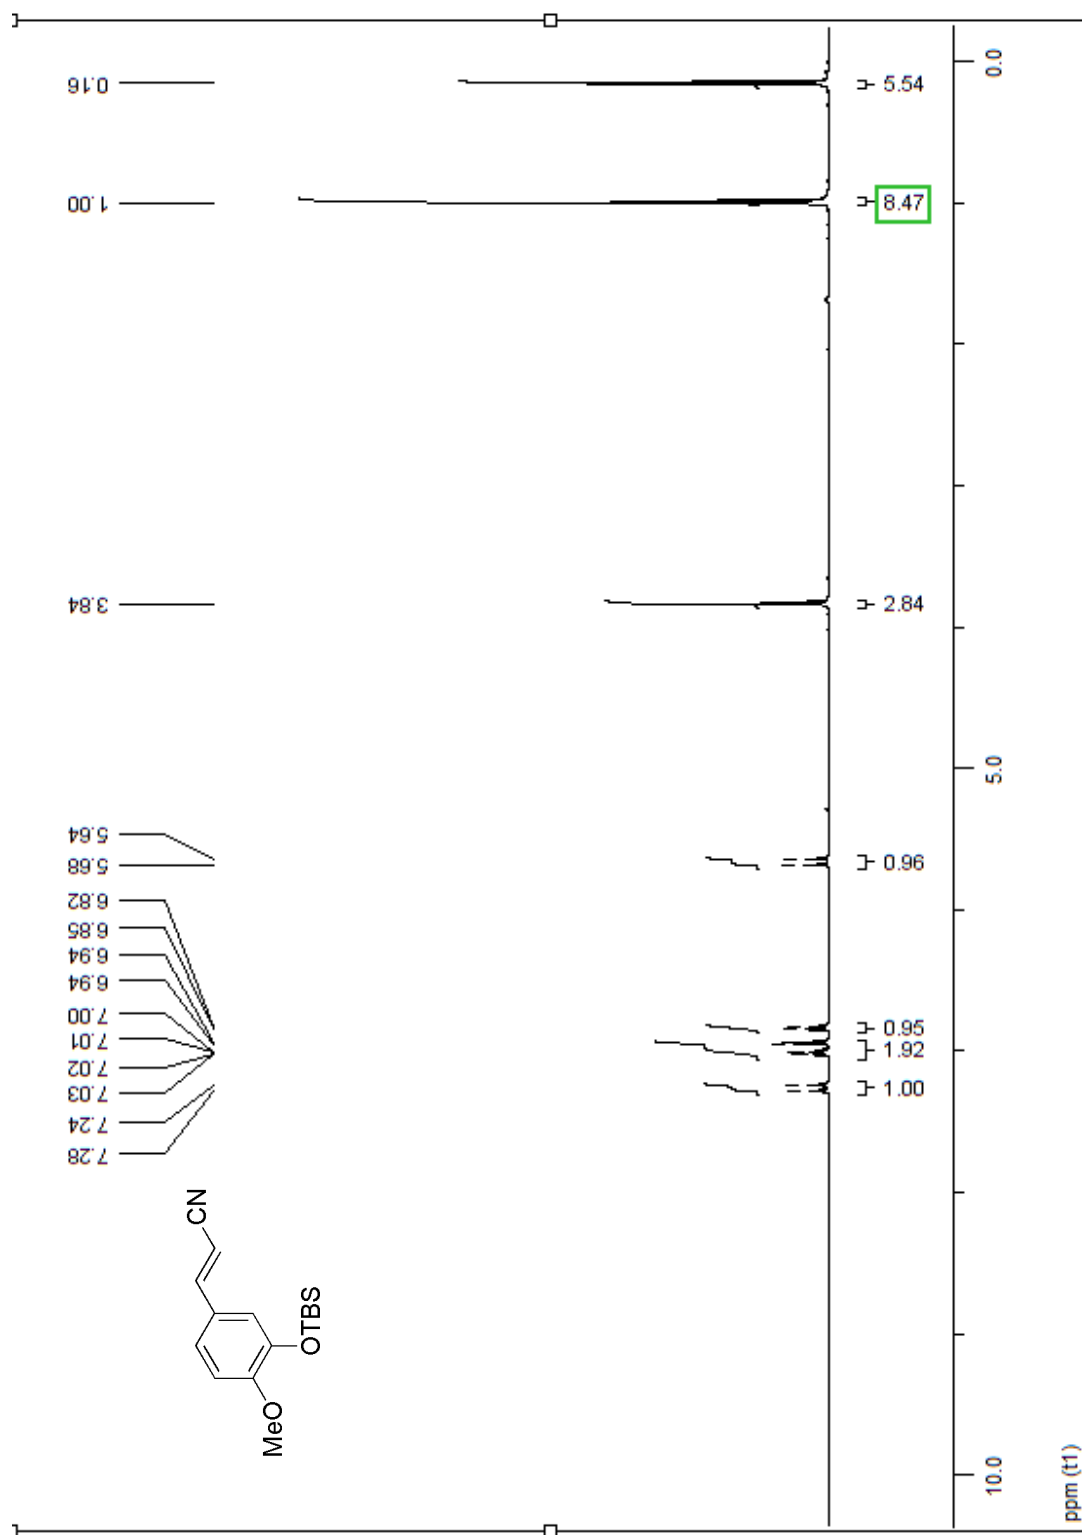

ESI30

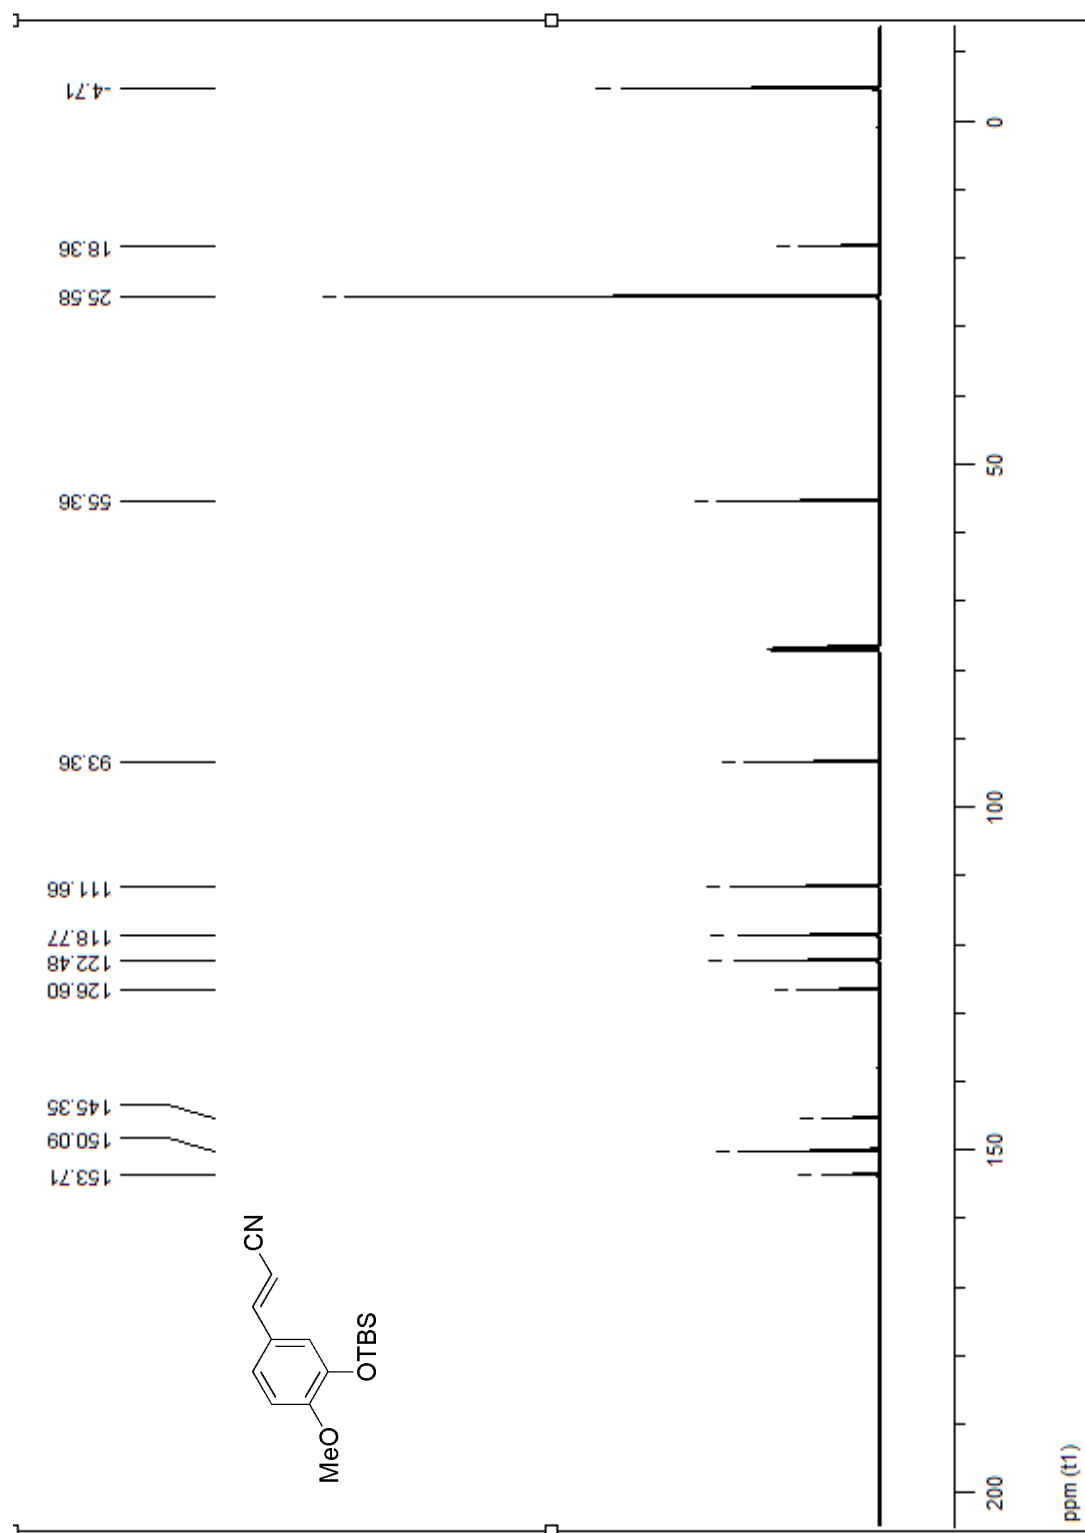

ESI31

Methyl 2-(iodomethyl)-5-methyloxazole-4-carboxylate 10

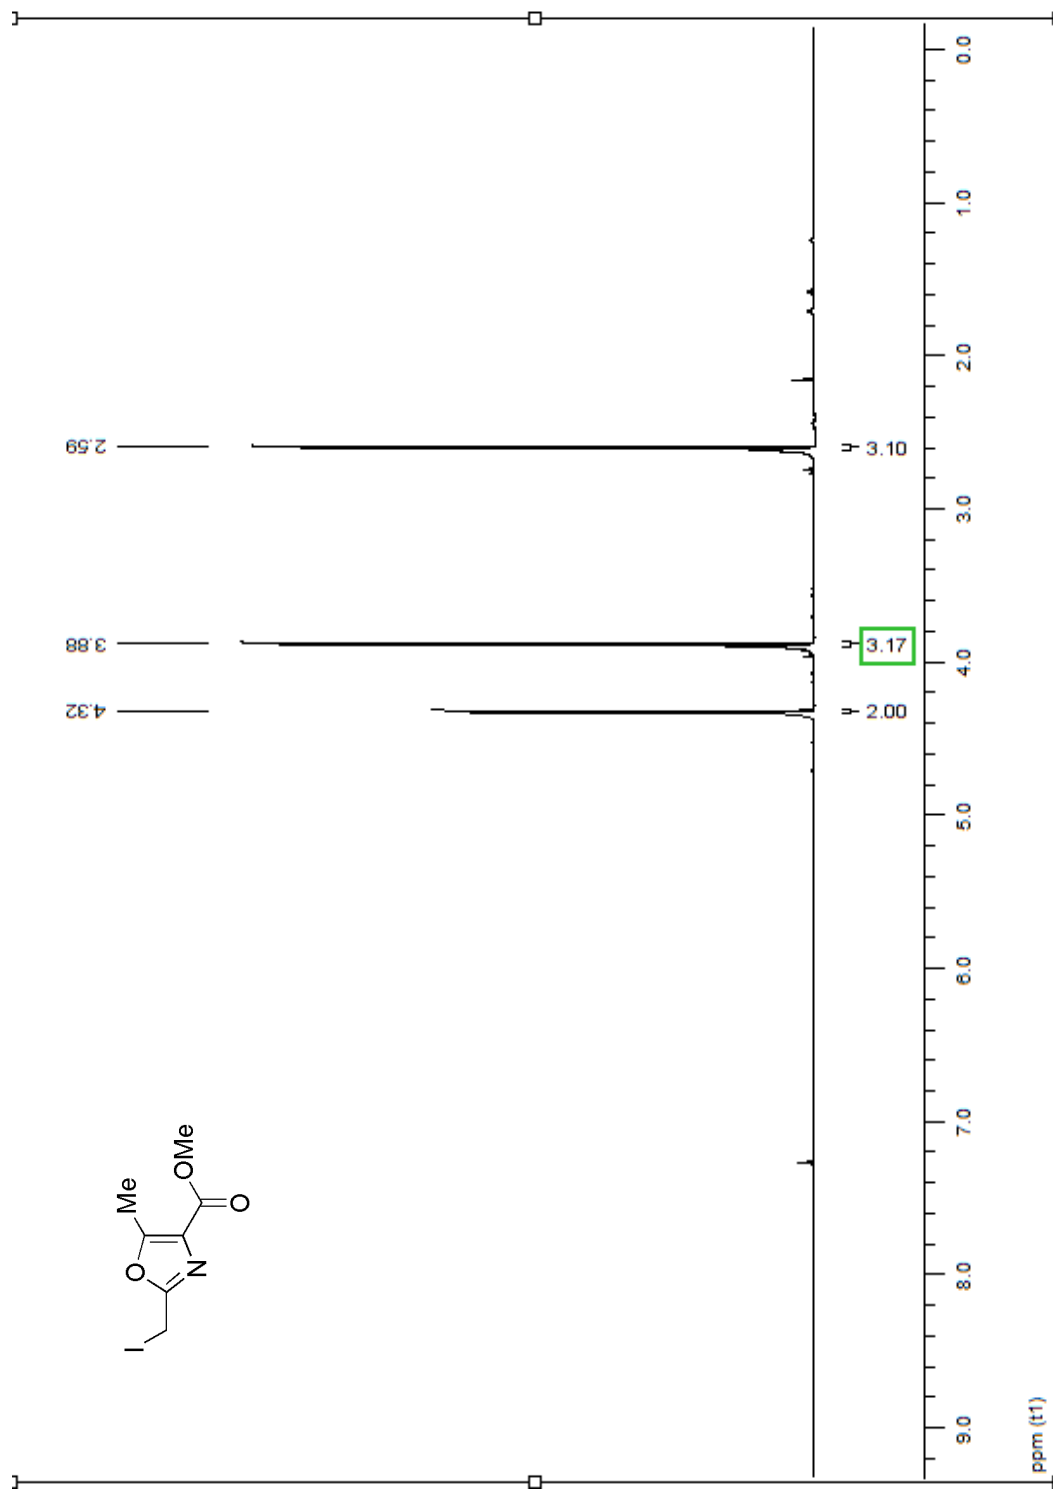

ESI32

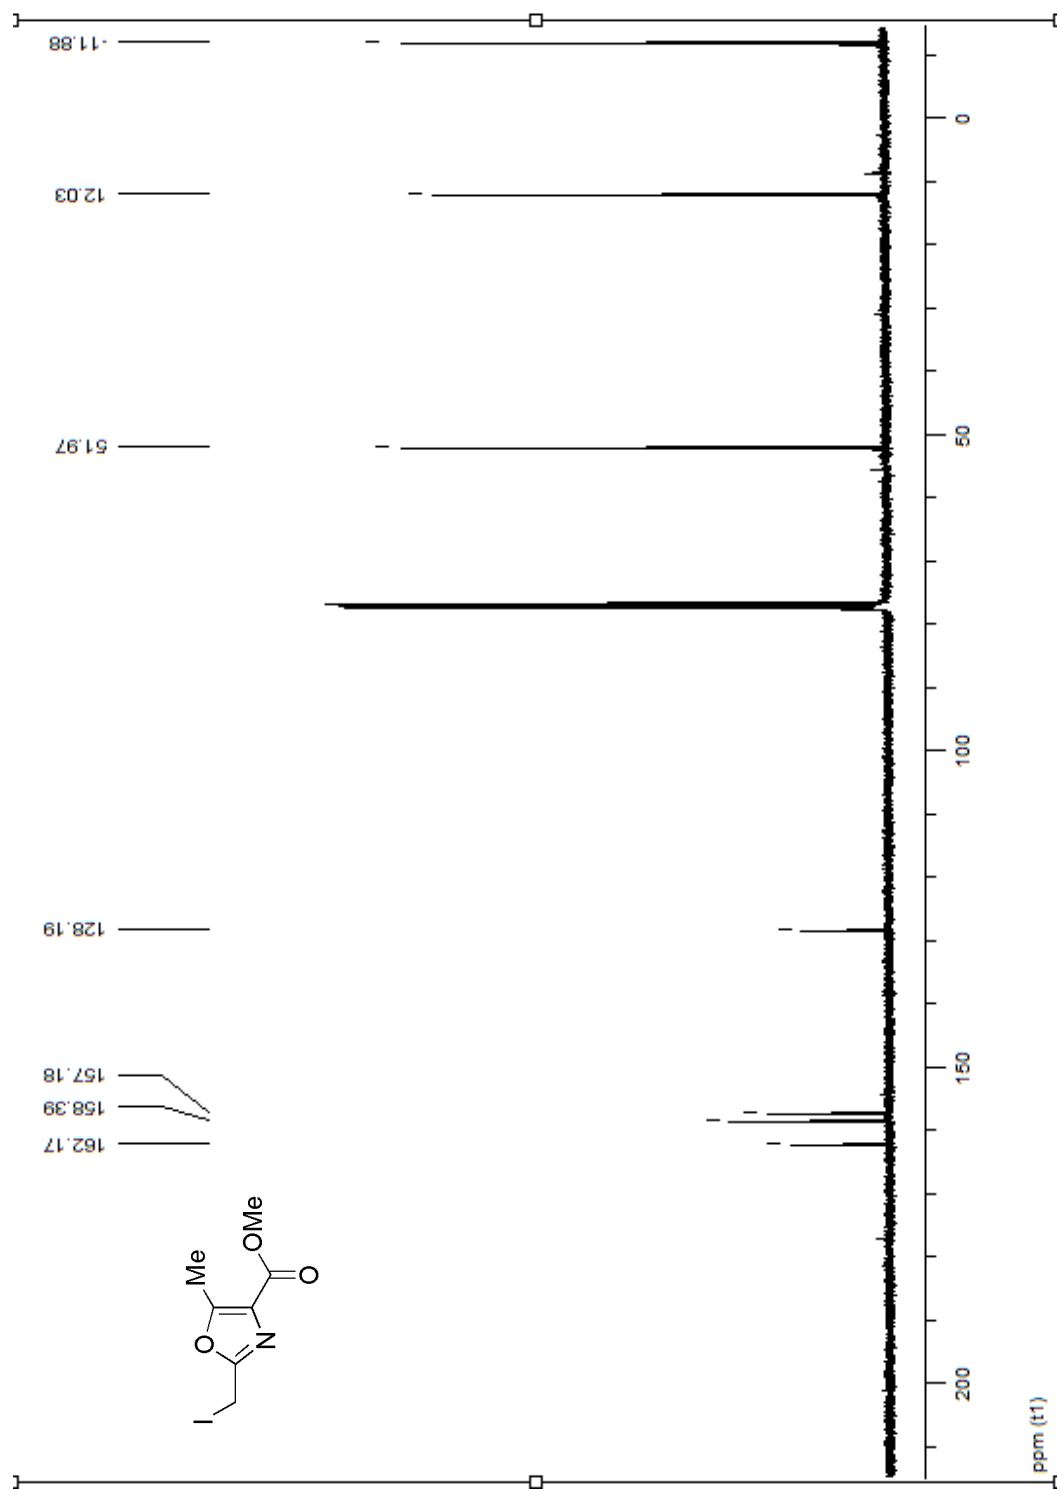



ESI33

Methyl 2,5-dimethyloxazole-4-carboxylate 11

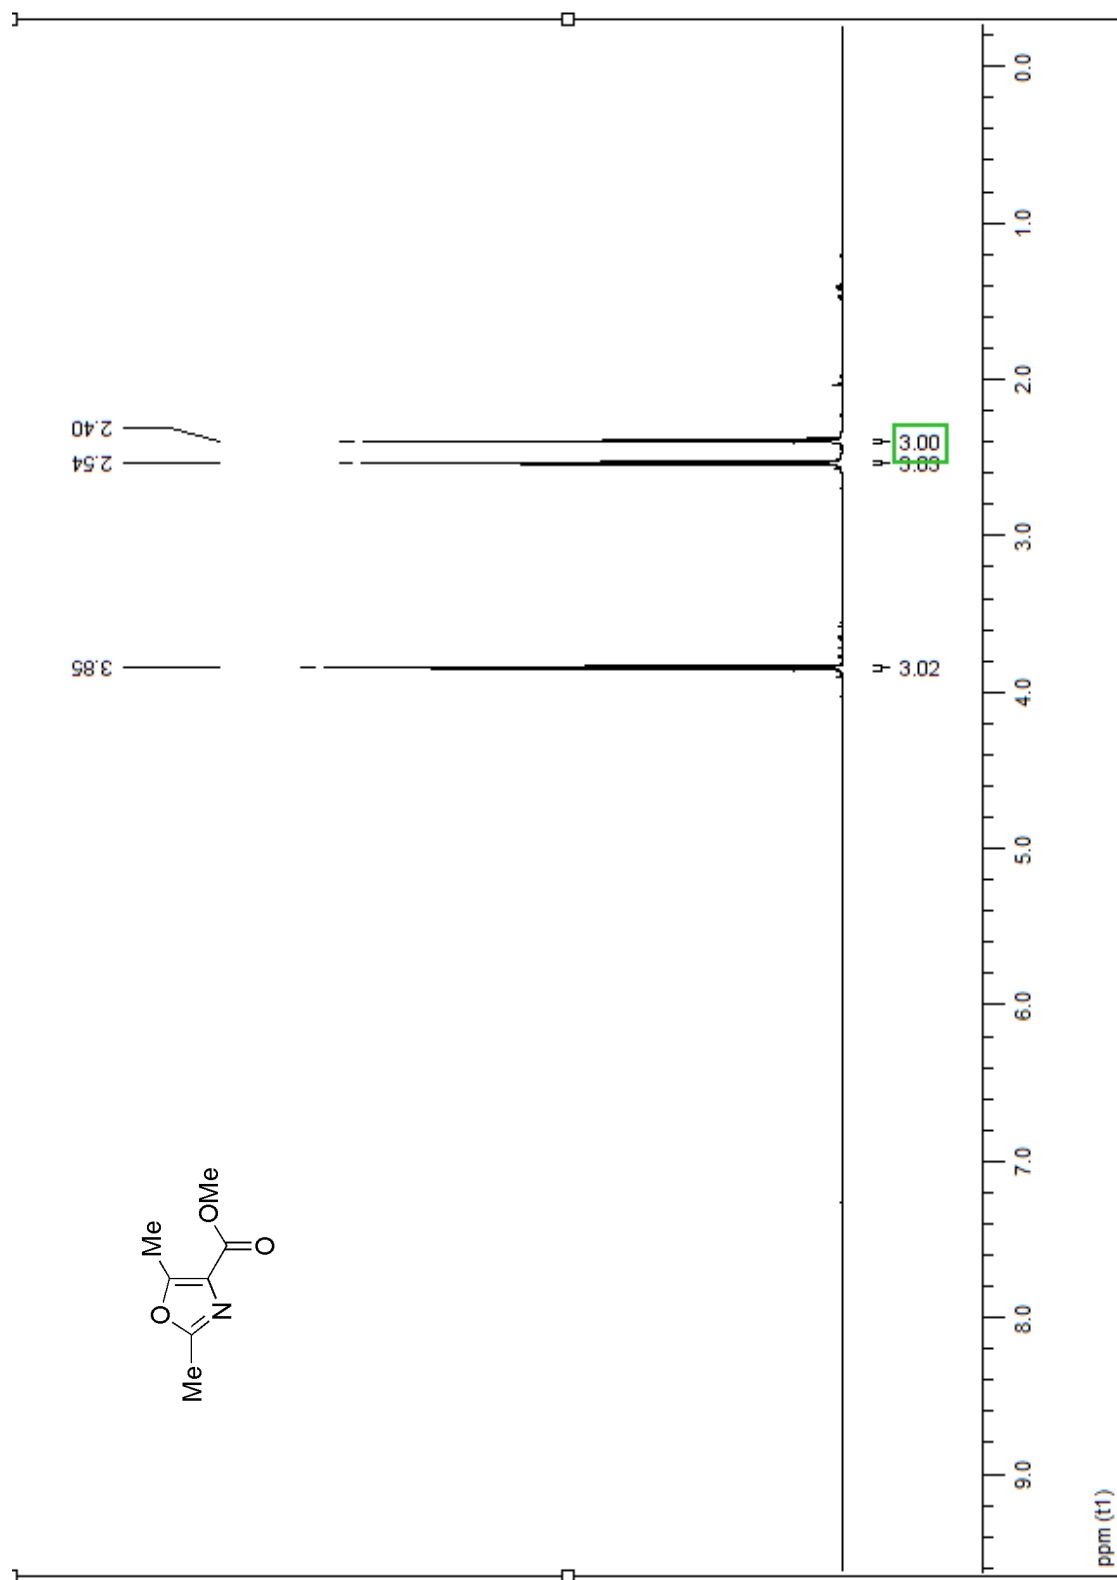

ESI34

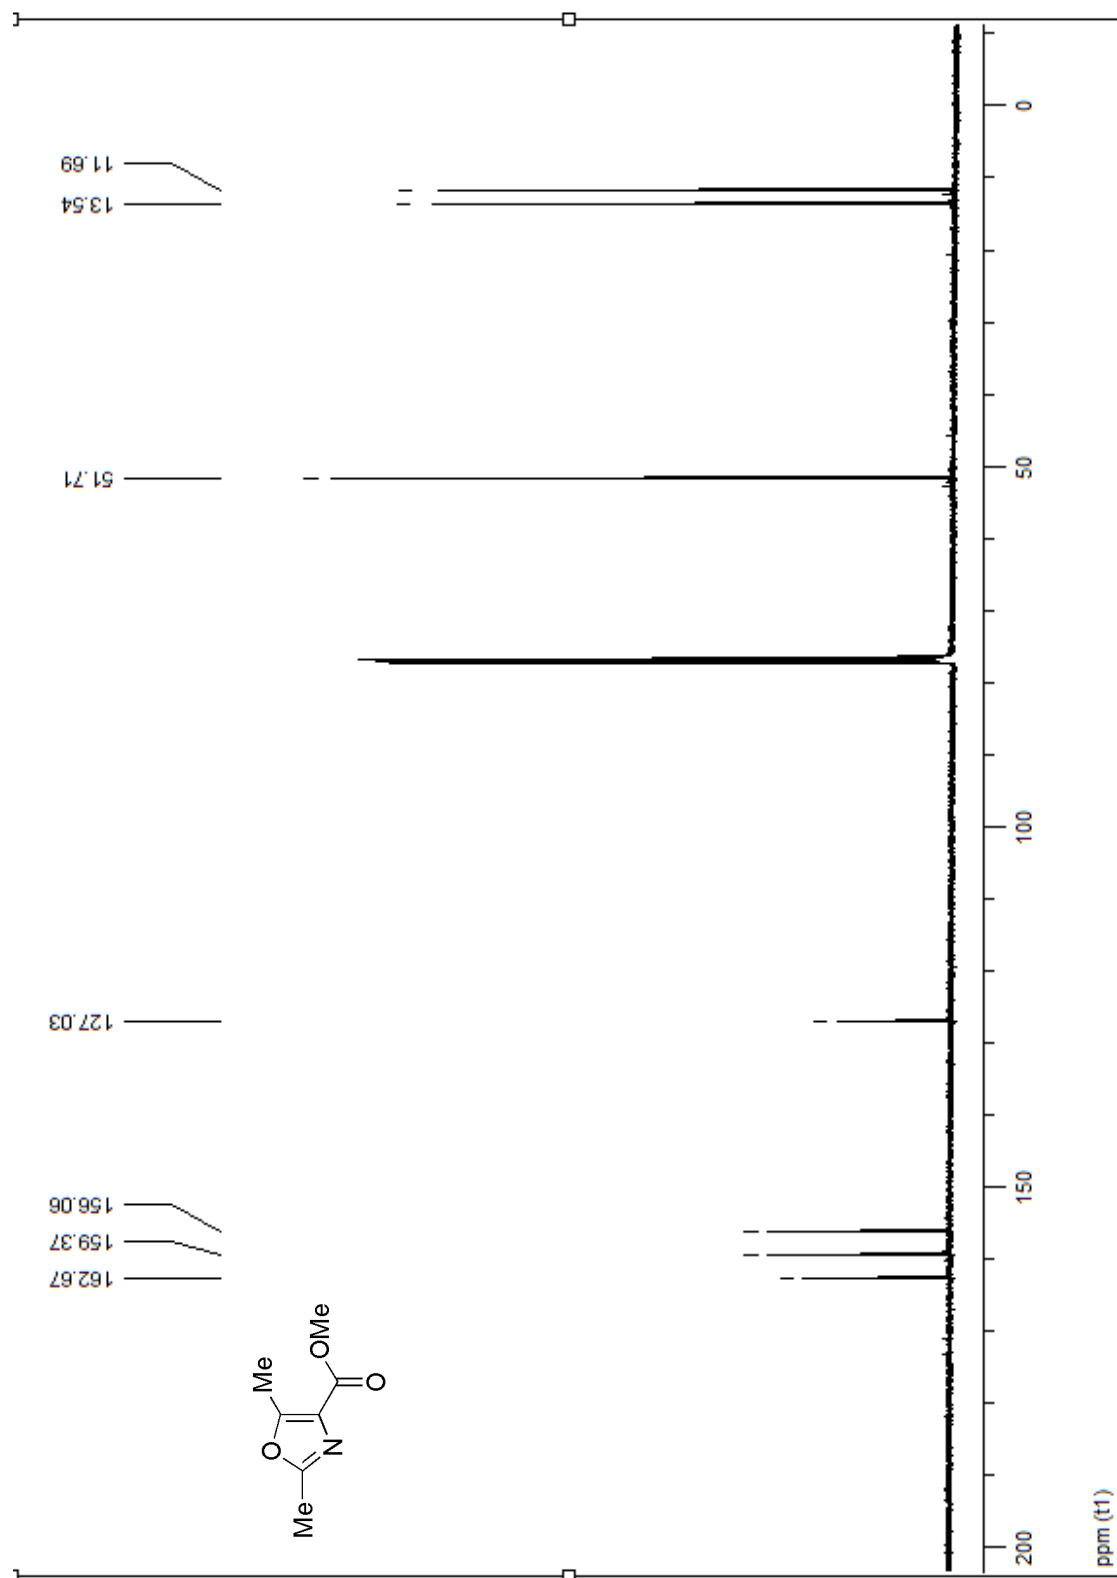

ESI35

2,5-Dimethyloxazole-4-carboxylic acid 12

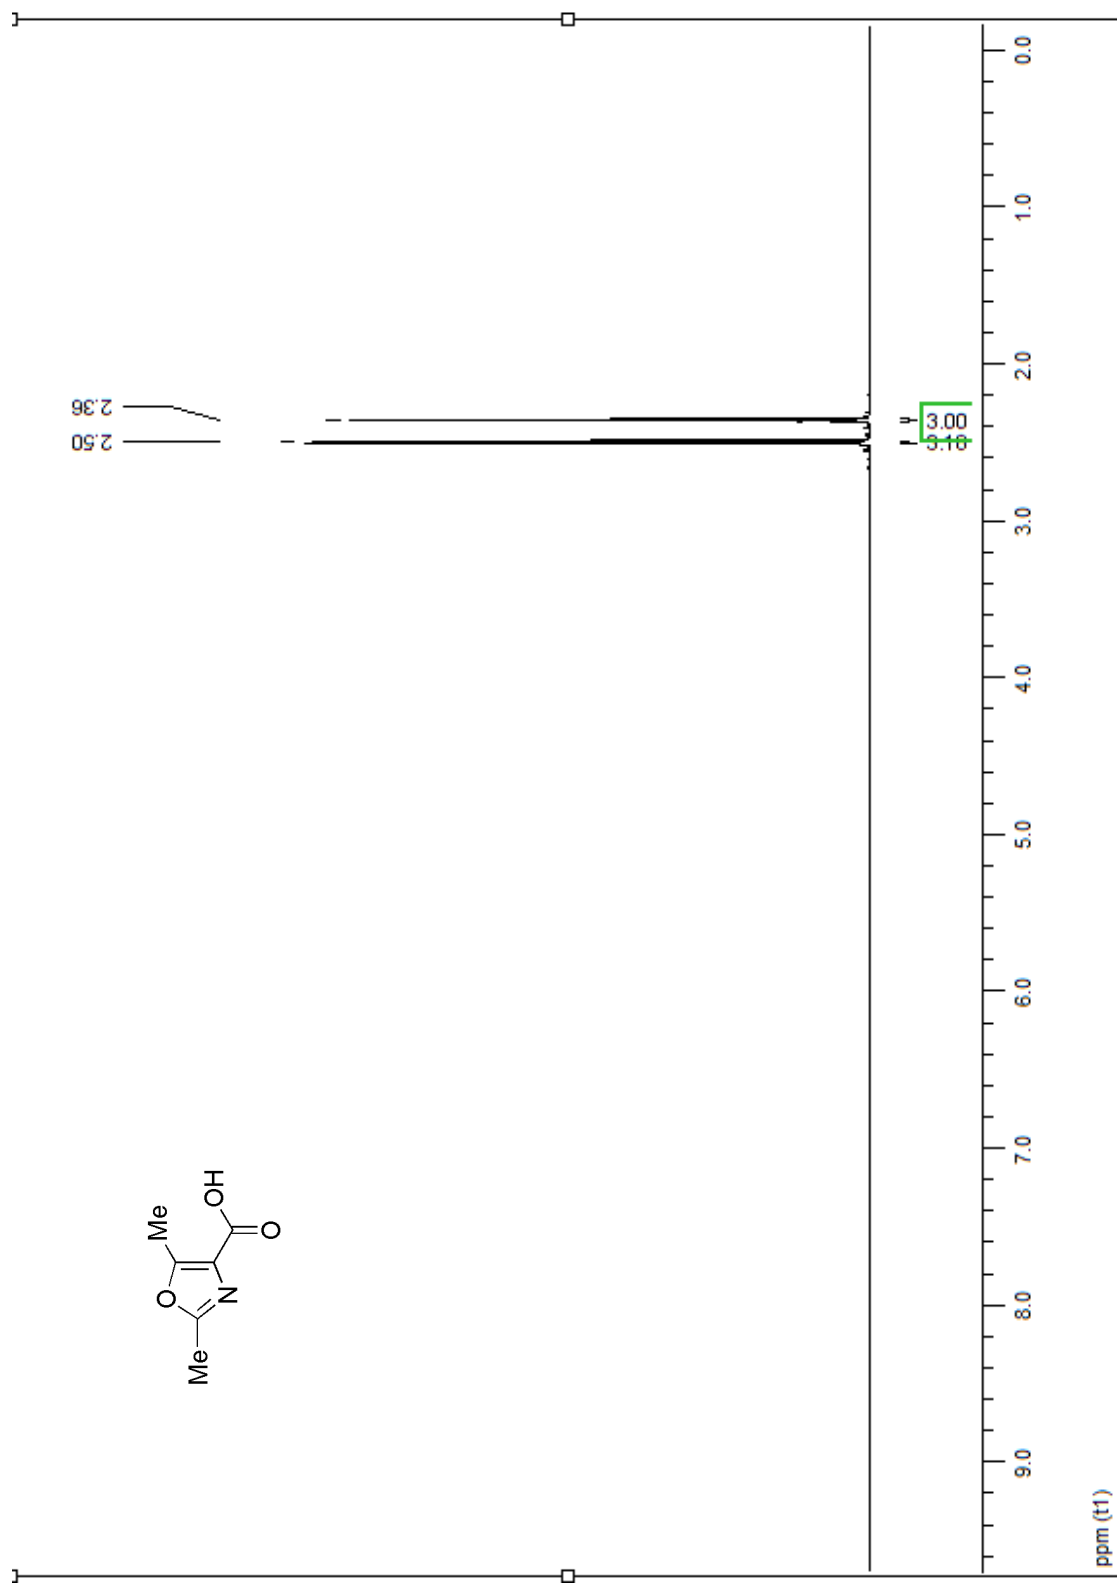

ESI36

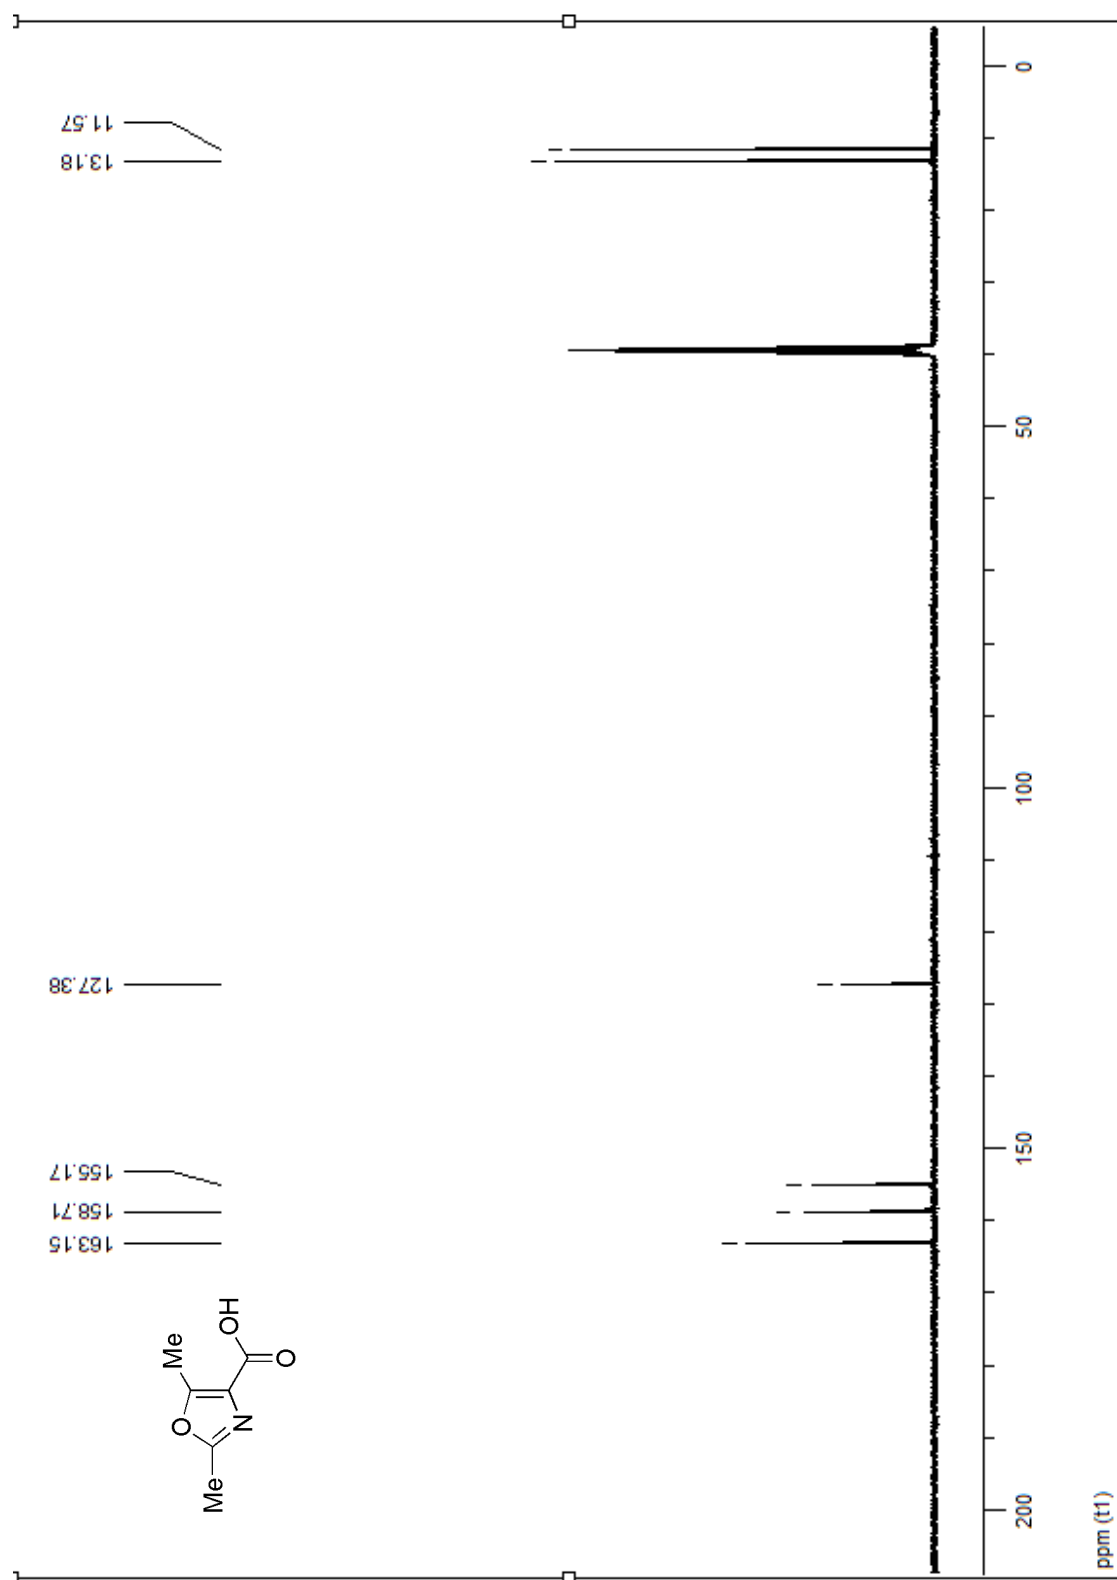

ESI37

***N*-Ethyl-2,5-dimethyloxazole-4-carboxamide 13**

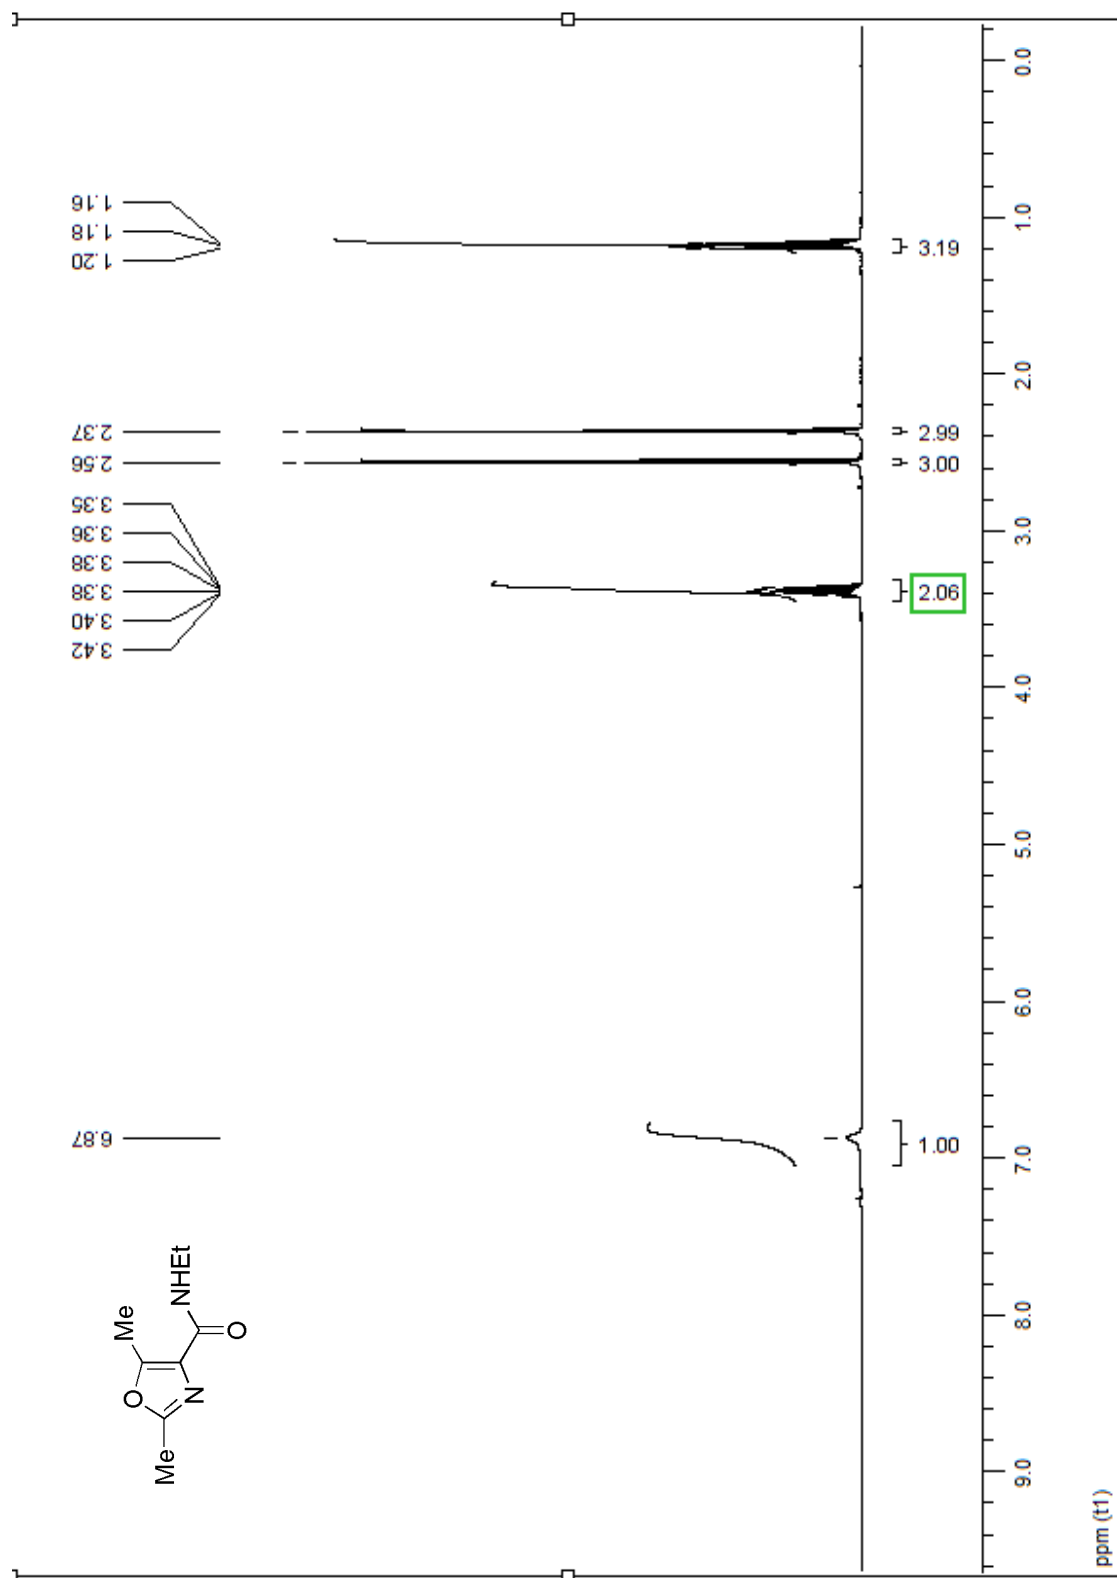

ESI38

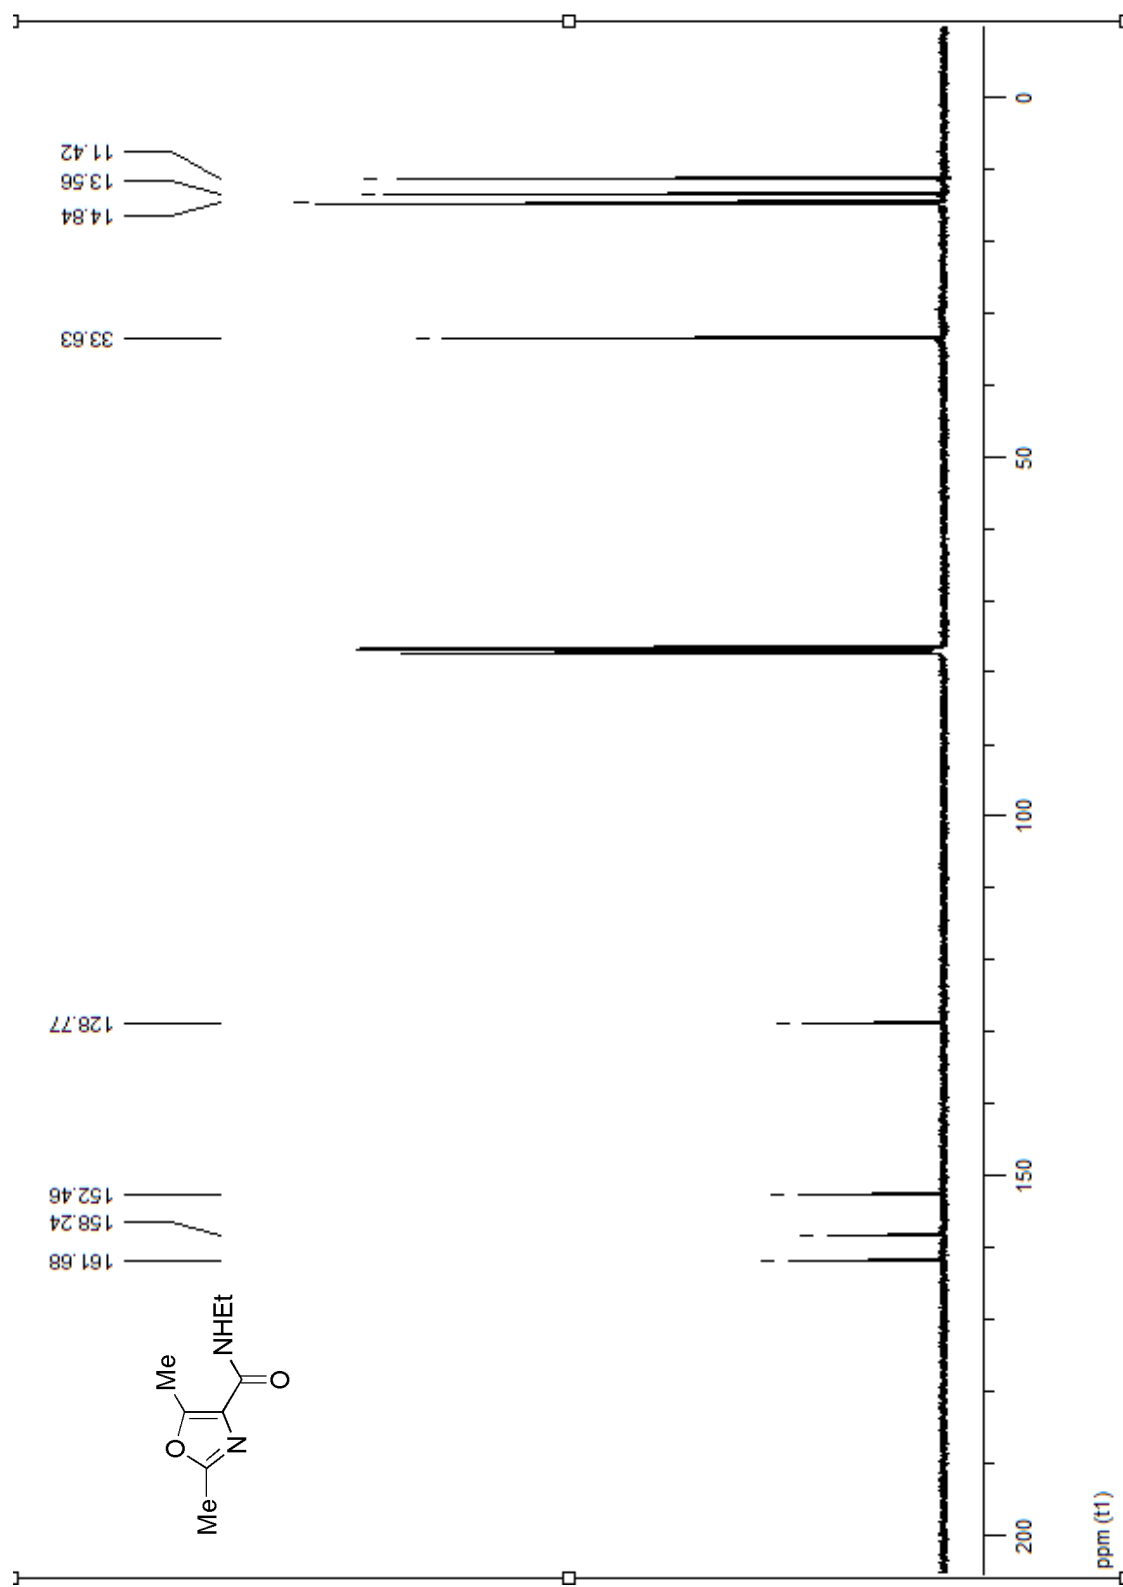

ESI39

*tert*-Butyl 2,5-dimethyloxazole-4-carboxylate 14

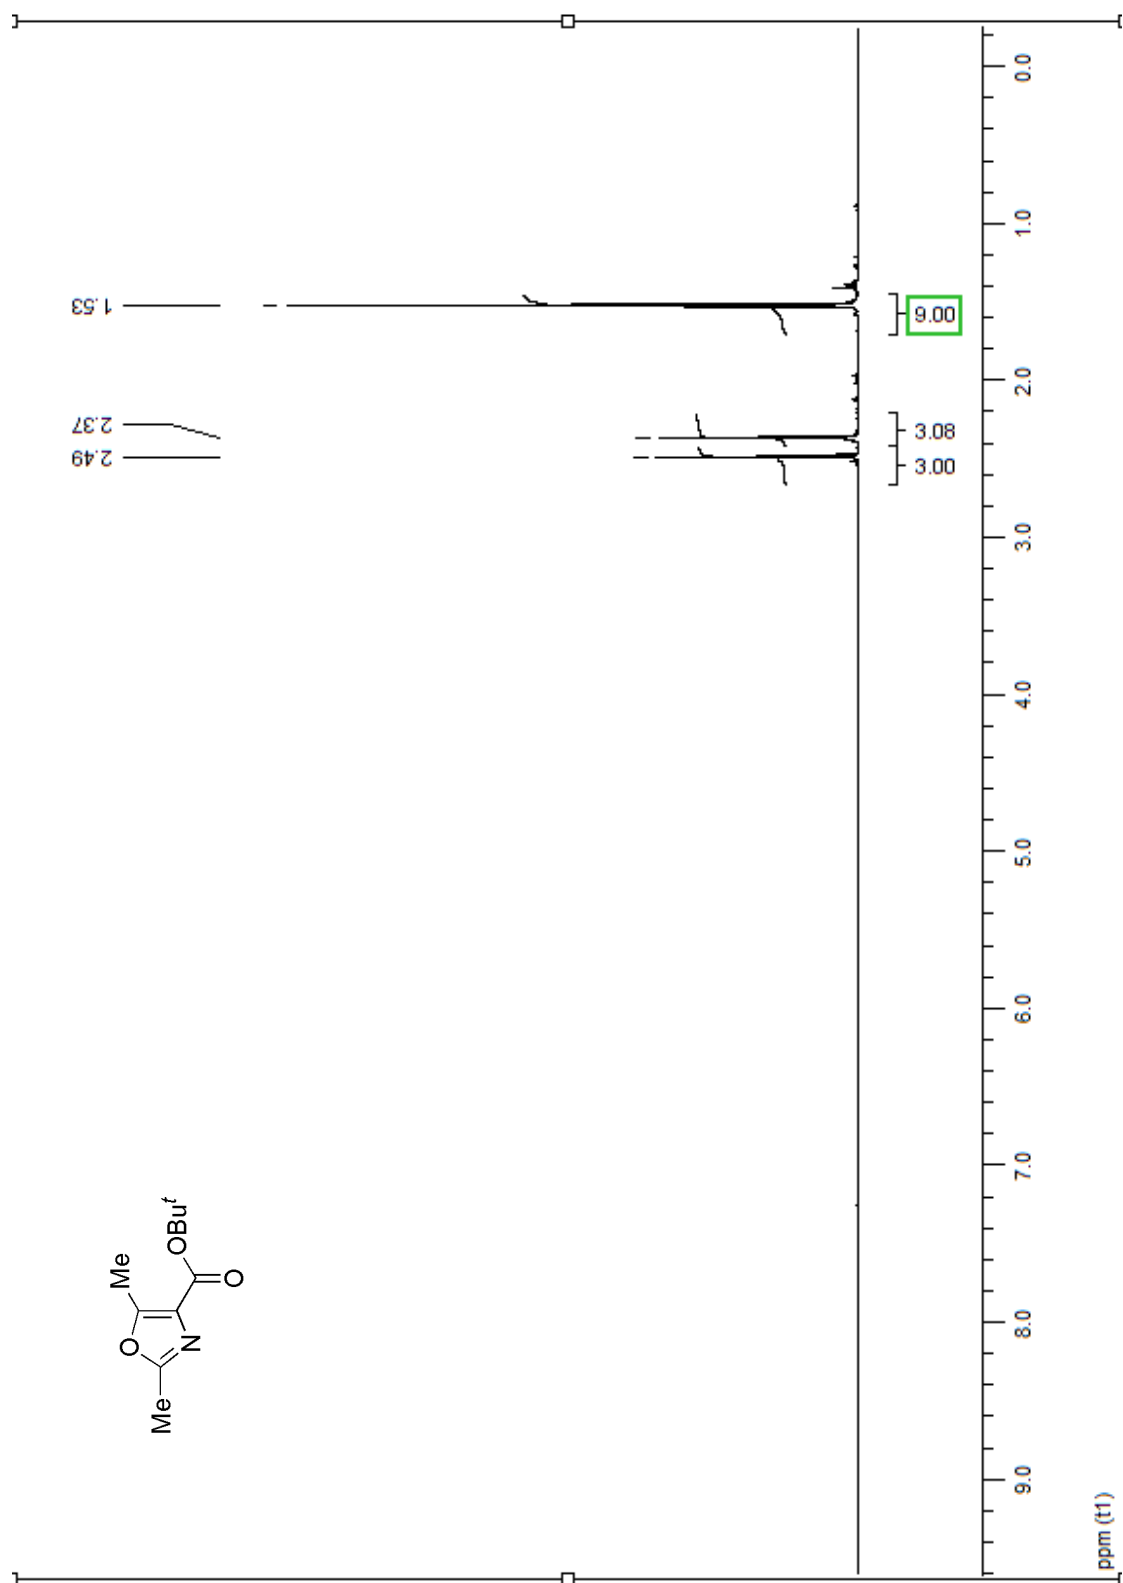

ESI40

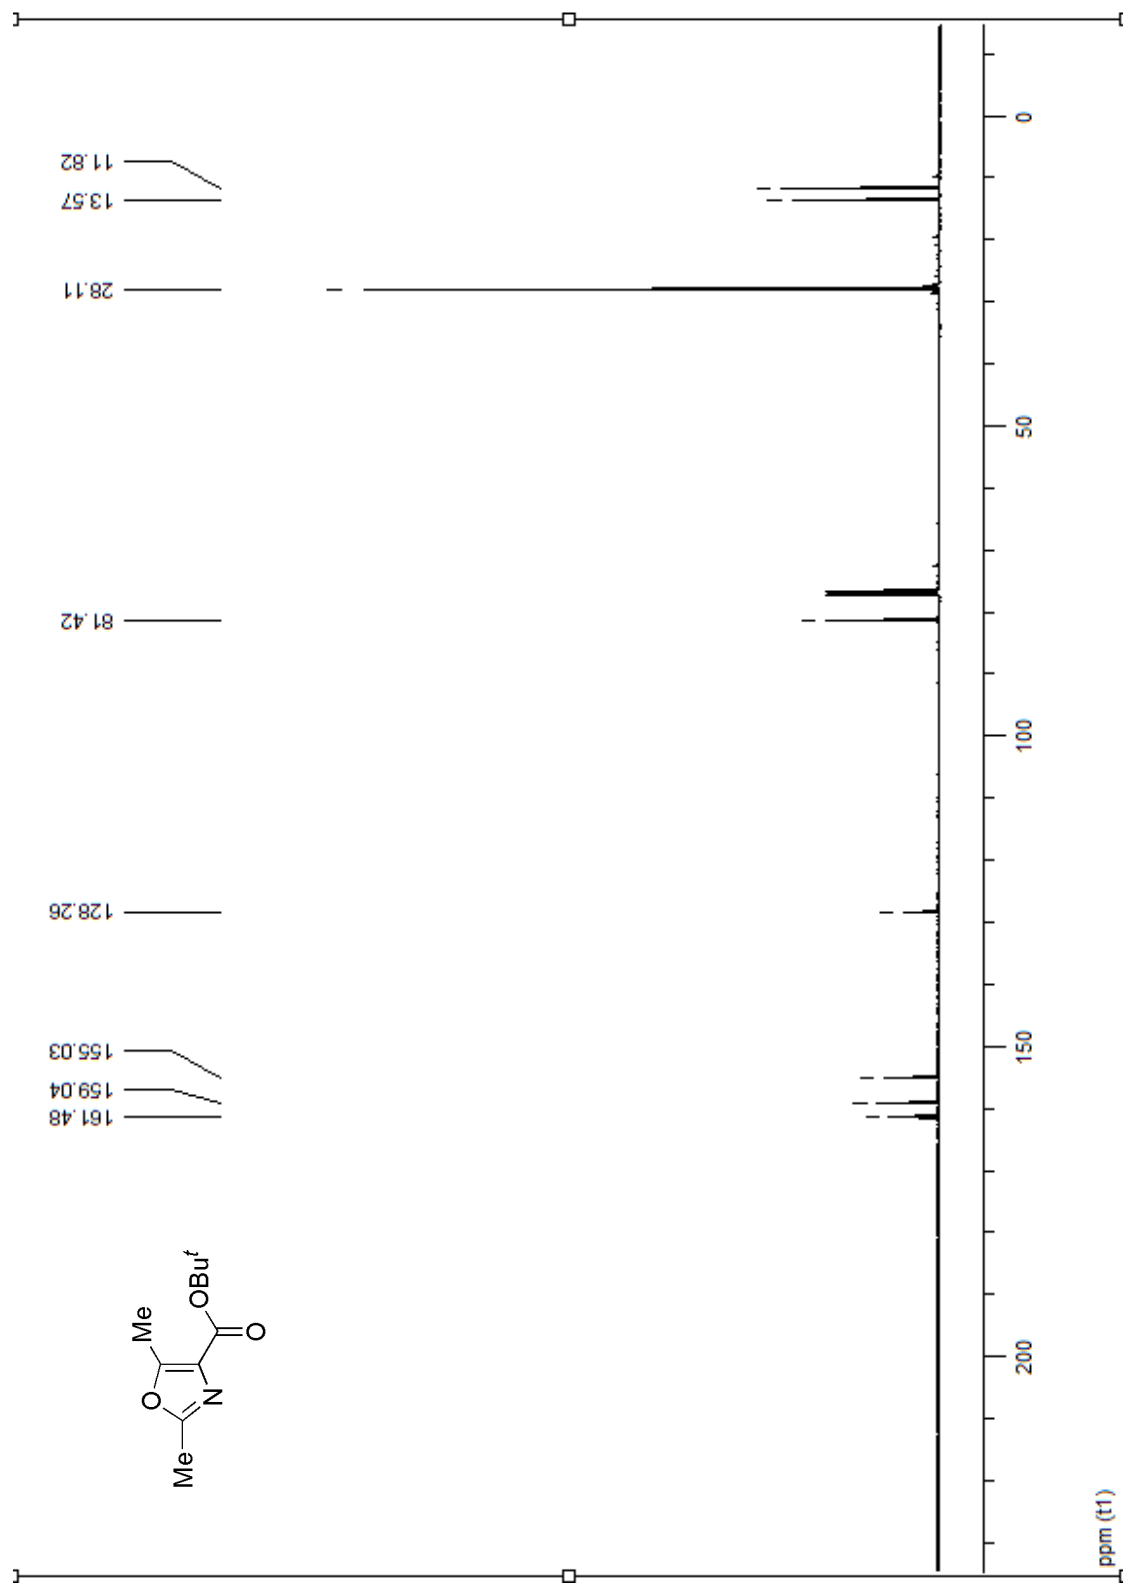



ESI41

**Methyl 2-(2-(2-(3-*tert*-butyldimethylsilyloxy-4-methoxystyryl)-5-methyloxazol-4-yl)-2-hydroxyethyl)-5-methylloxazole-4-carboxylate 17a**

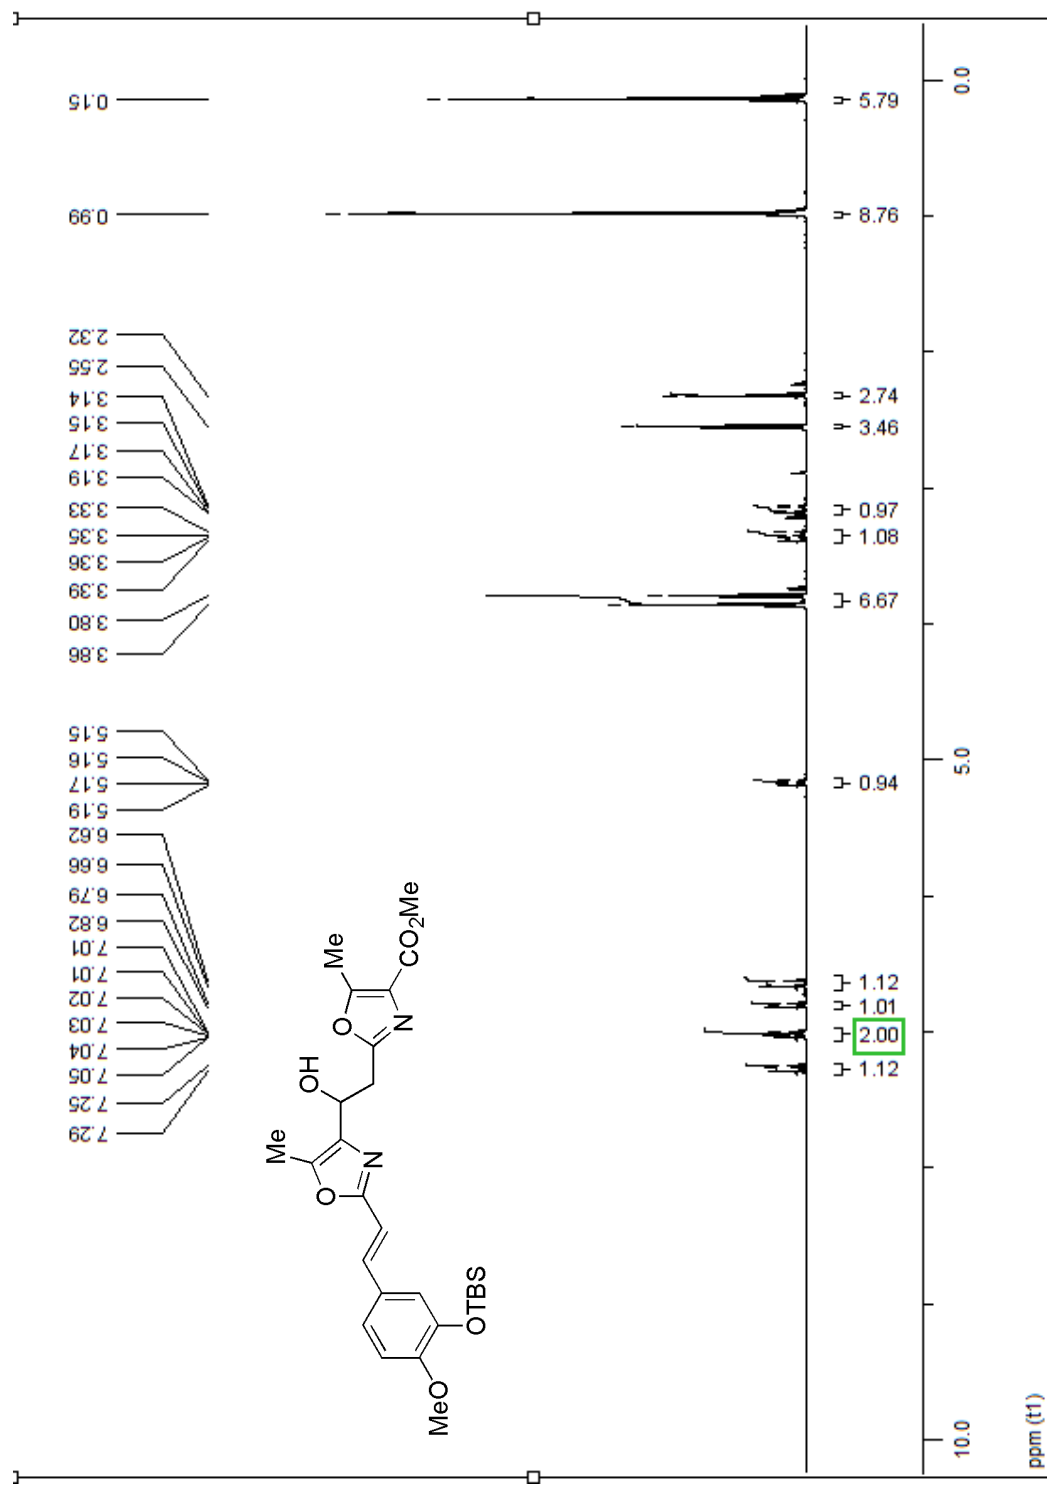

ESI42

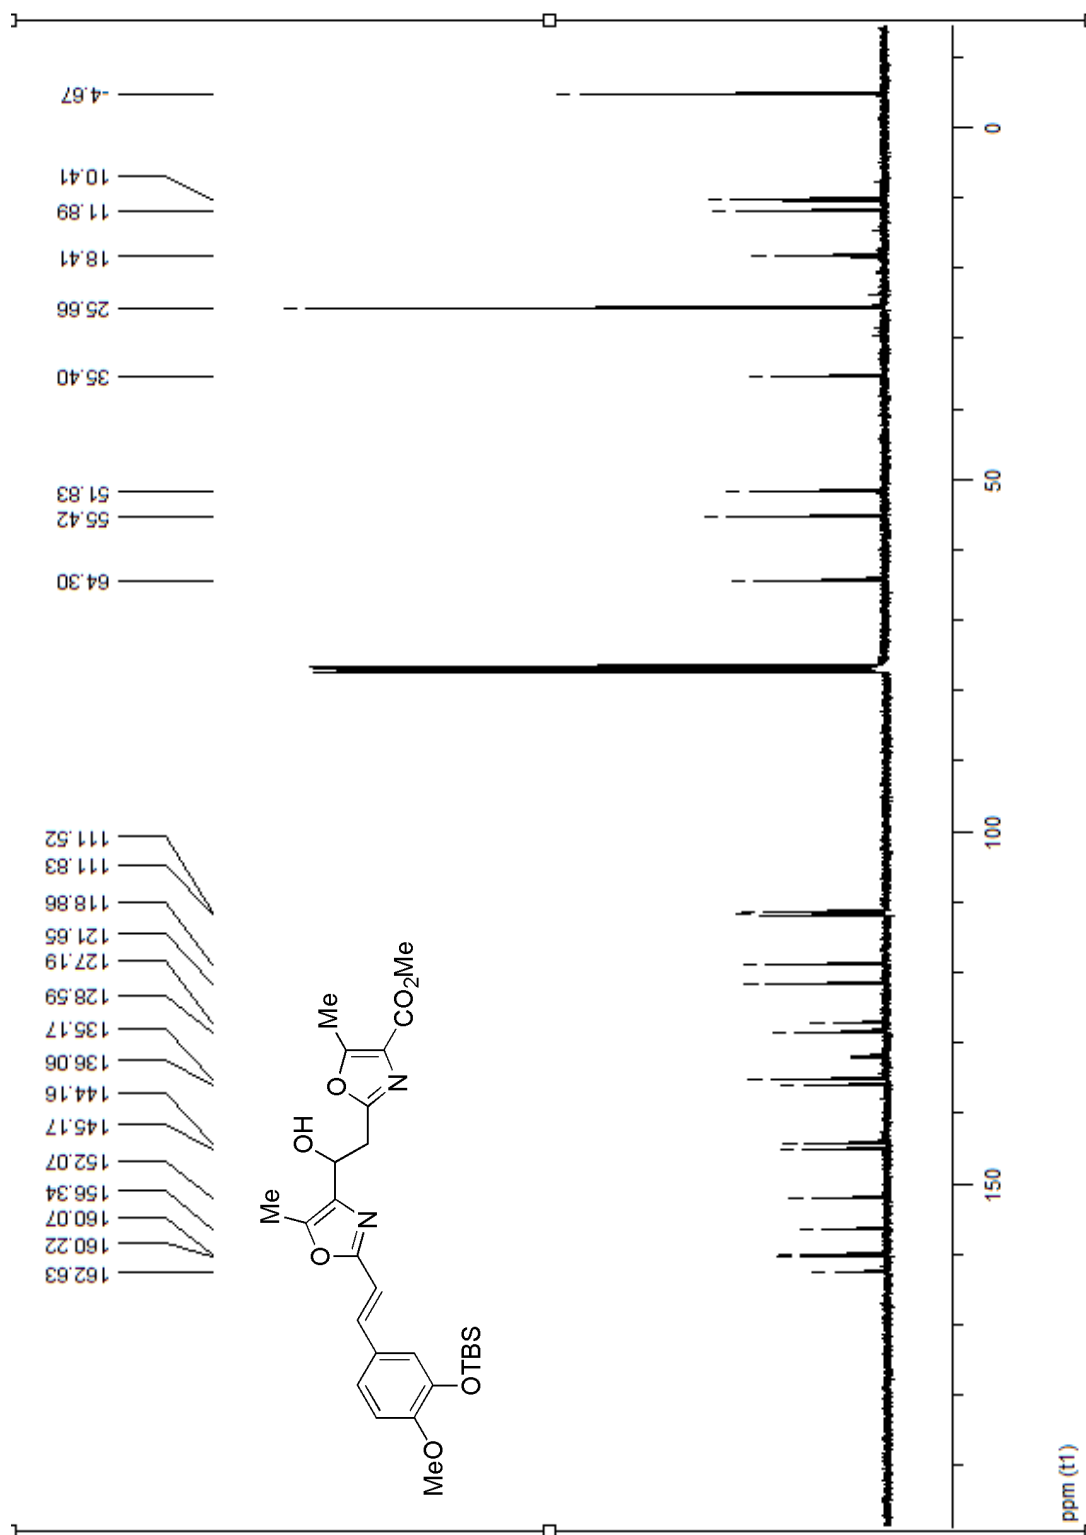

ESI43

Methyl 2-(2-(2-(3-*tert*-butyldimethylsilyloxy-4-methoxystyryl)-5-methyloxazol-4-yl)-2-oxoethyl)-5-methyloxazole-4-carboxylate

15

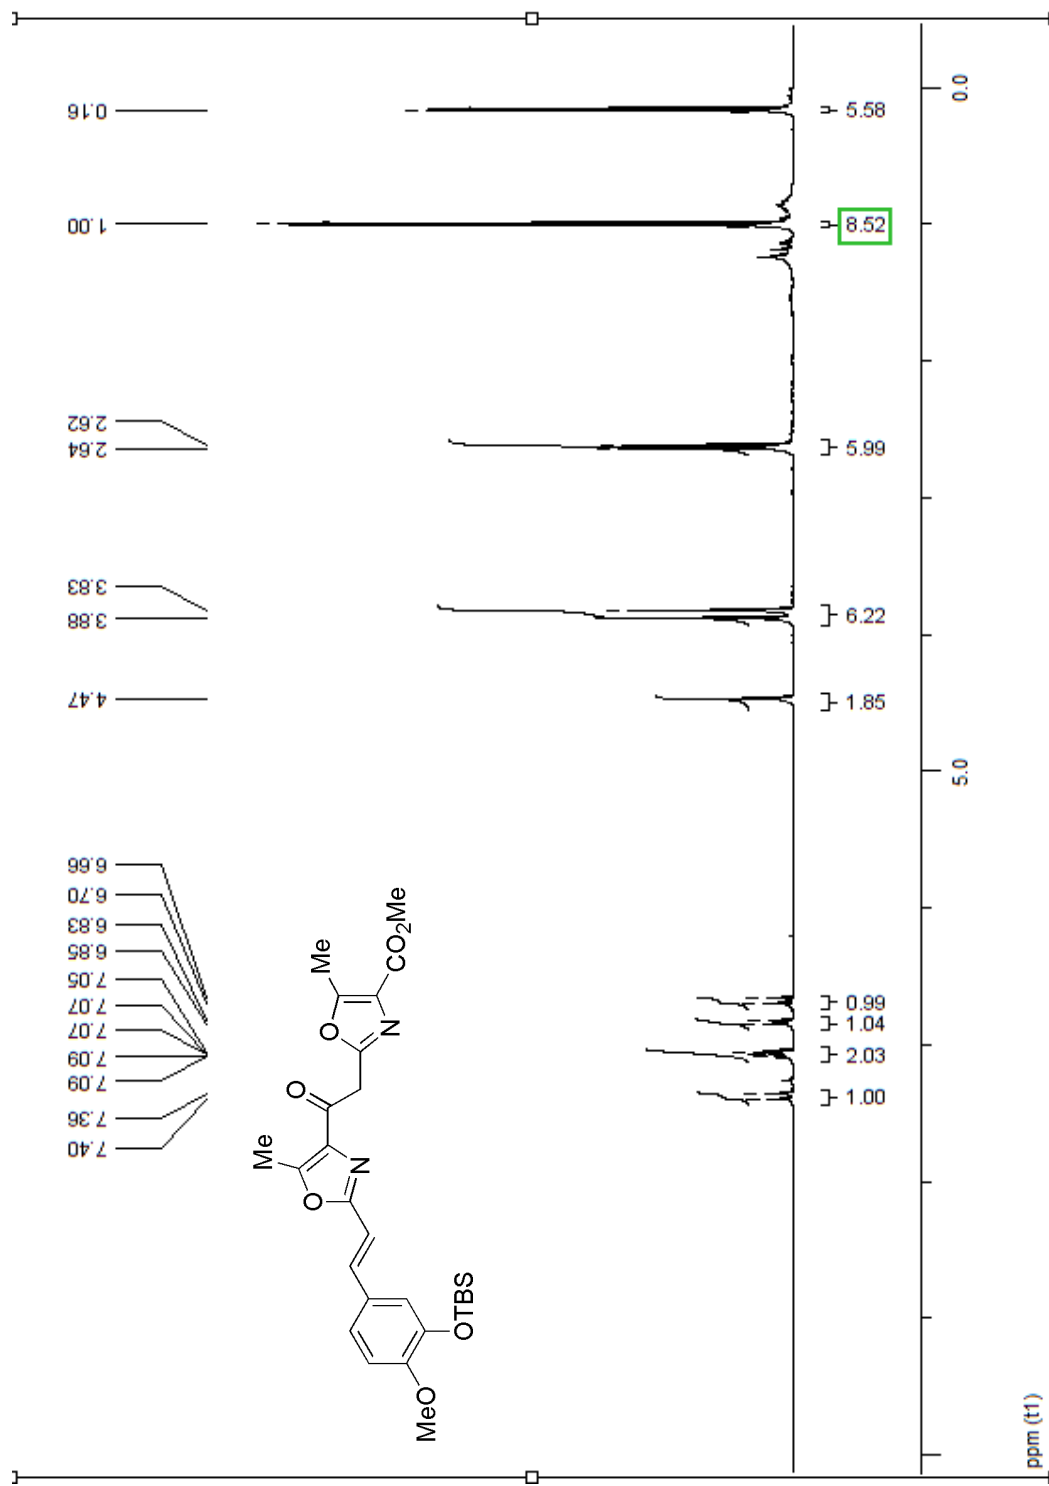

ESI44

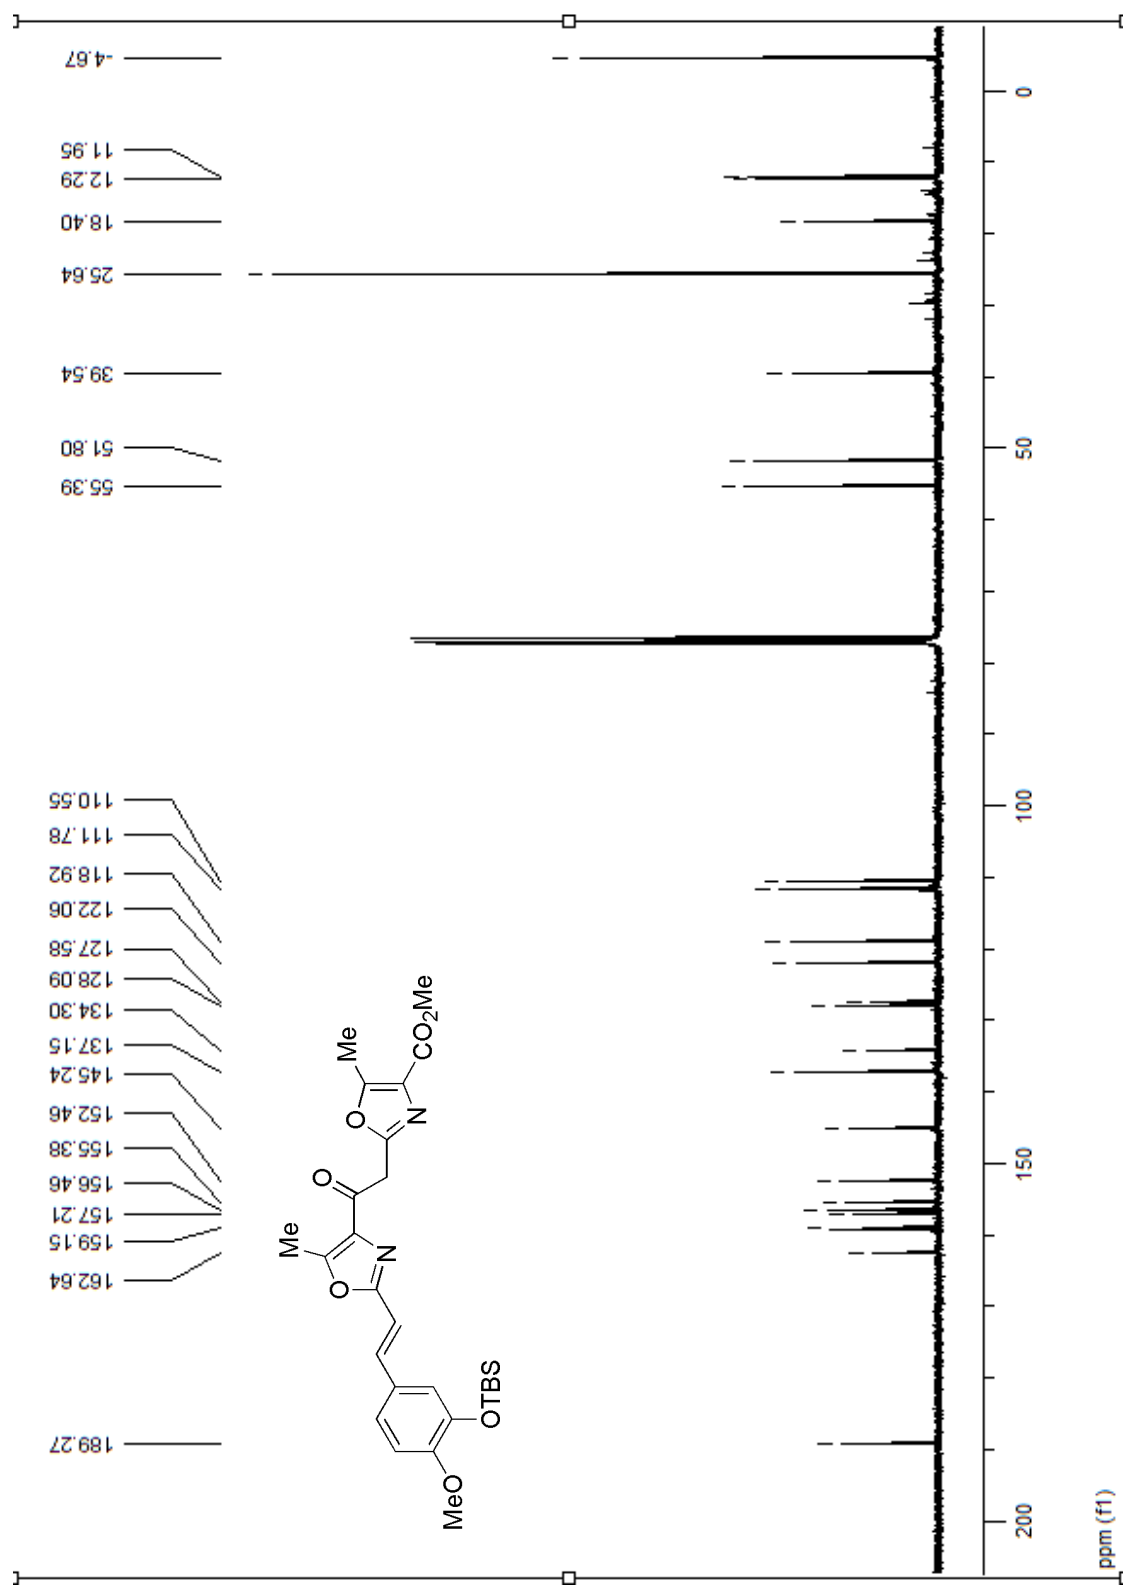

ESI45

TBDMS-protected siphonazole 19

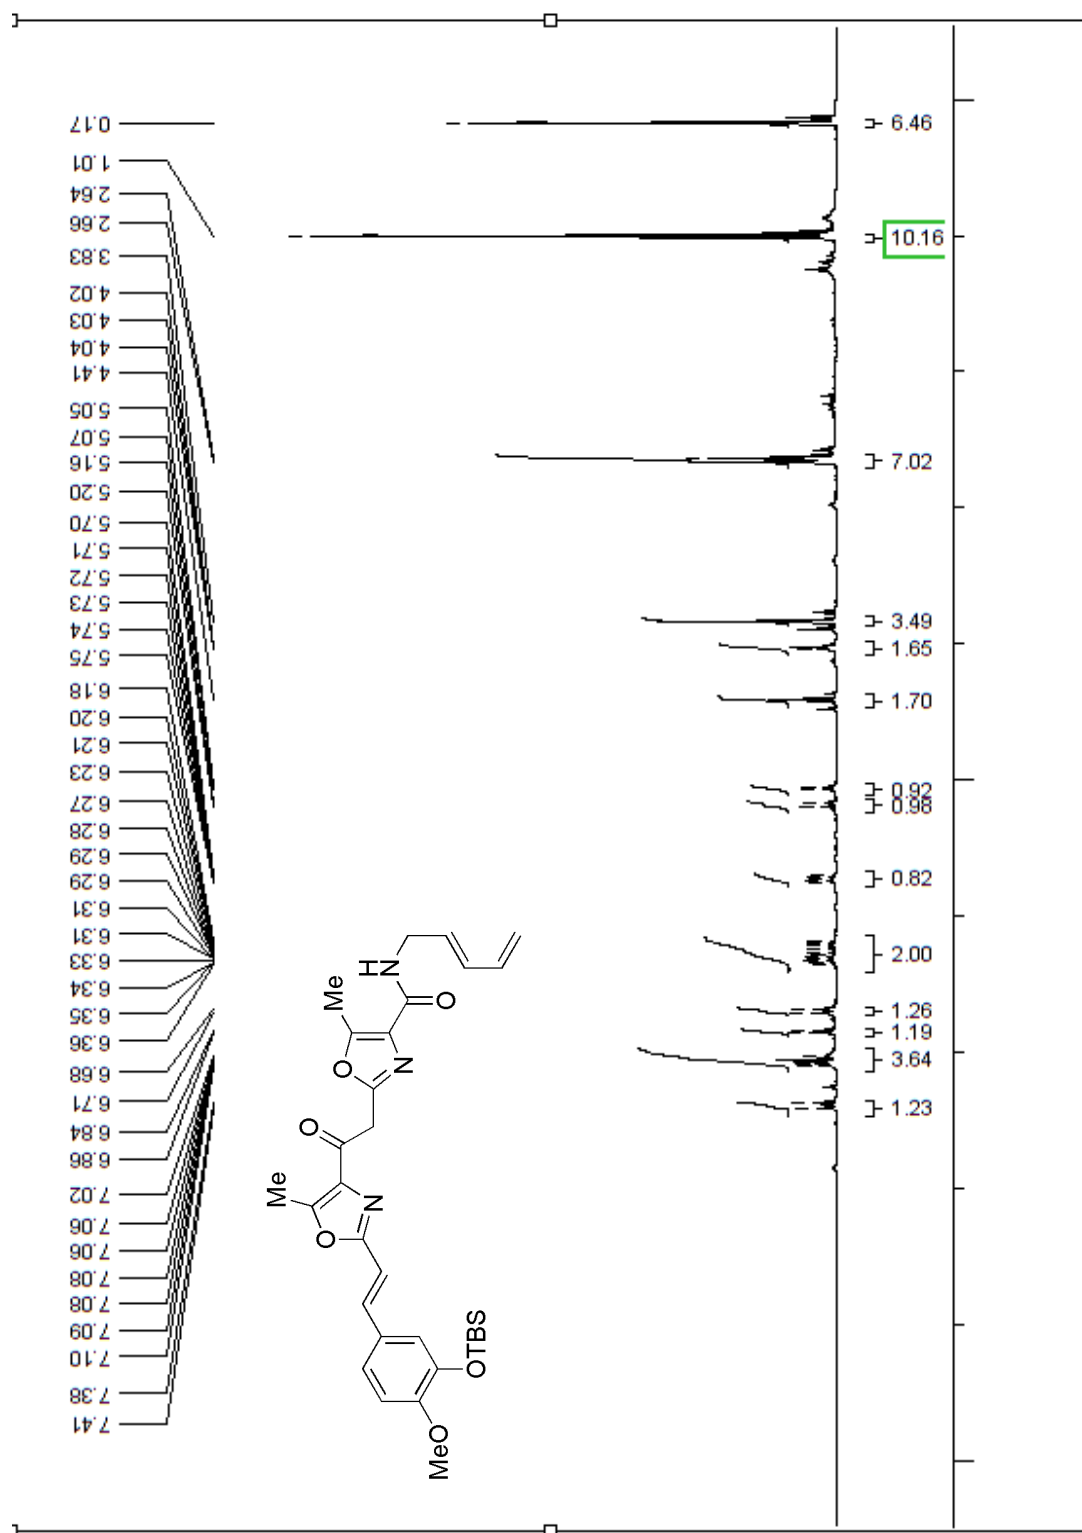

ESI46

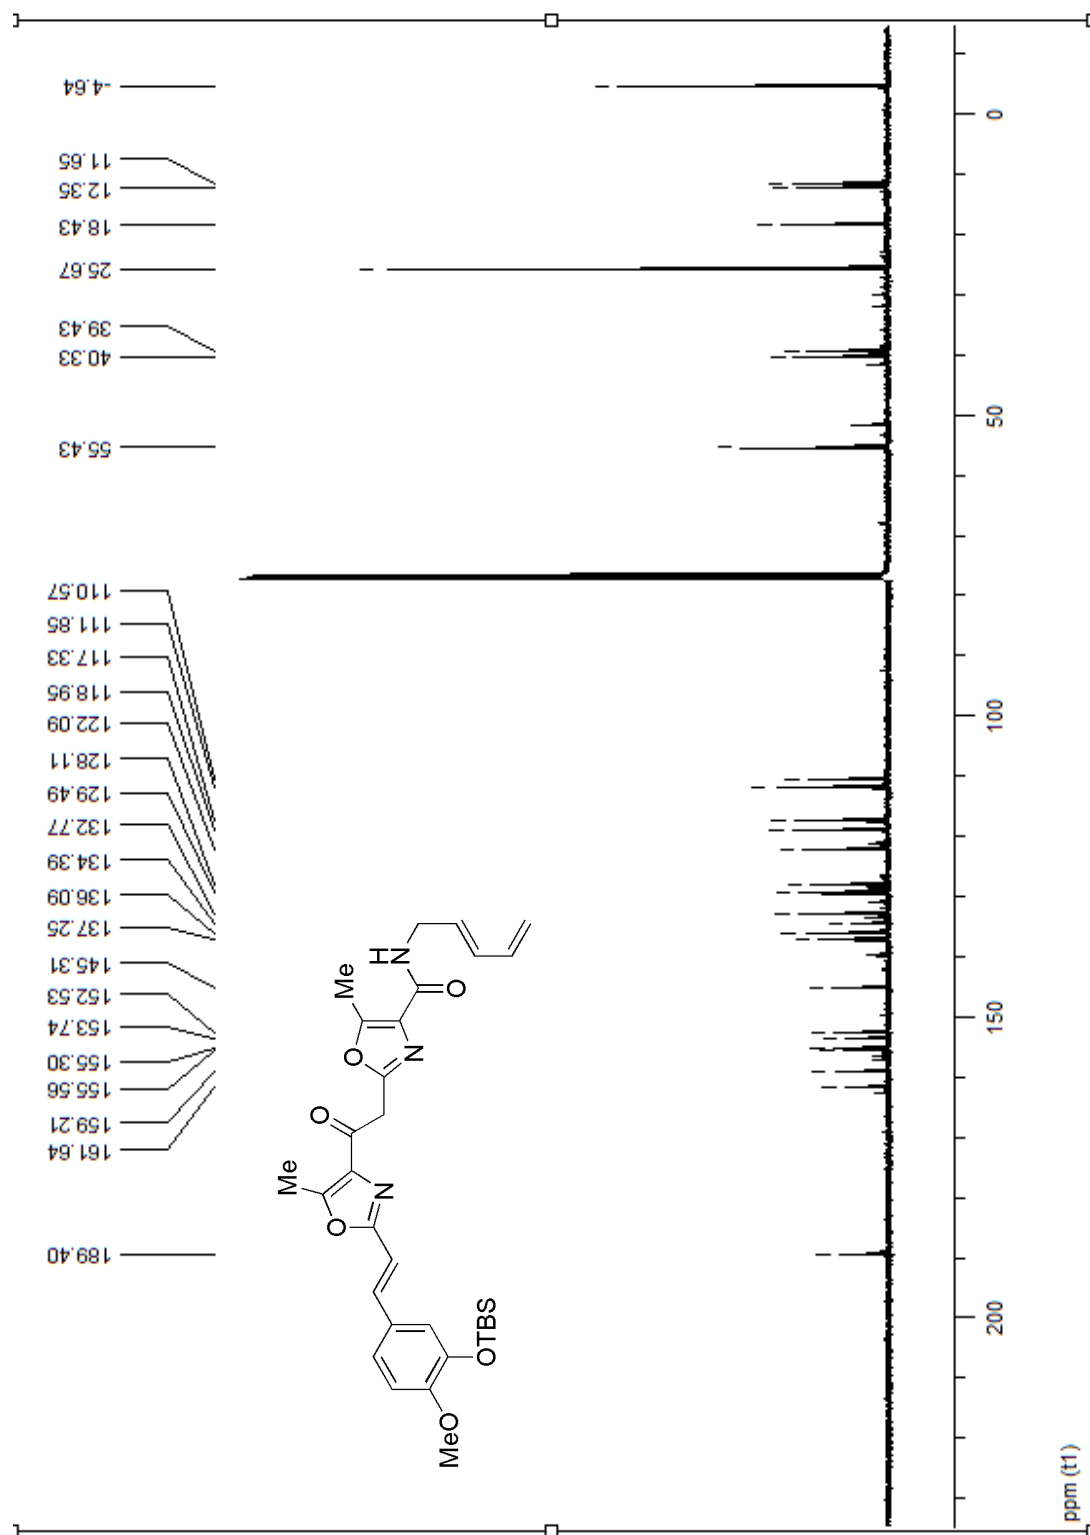

ESI47

### Synthetic siphonazole 1.

synthetic siphonazole

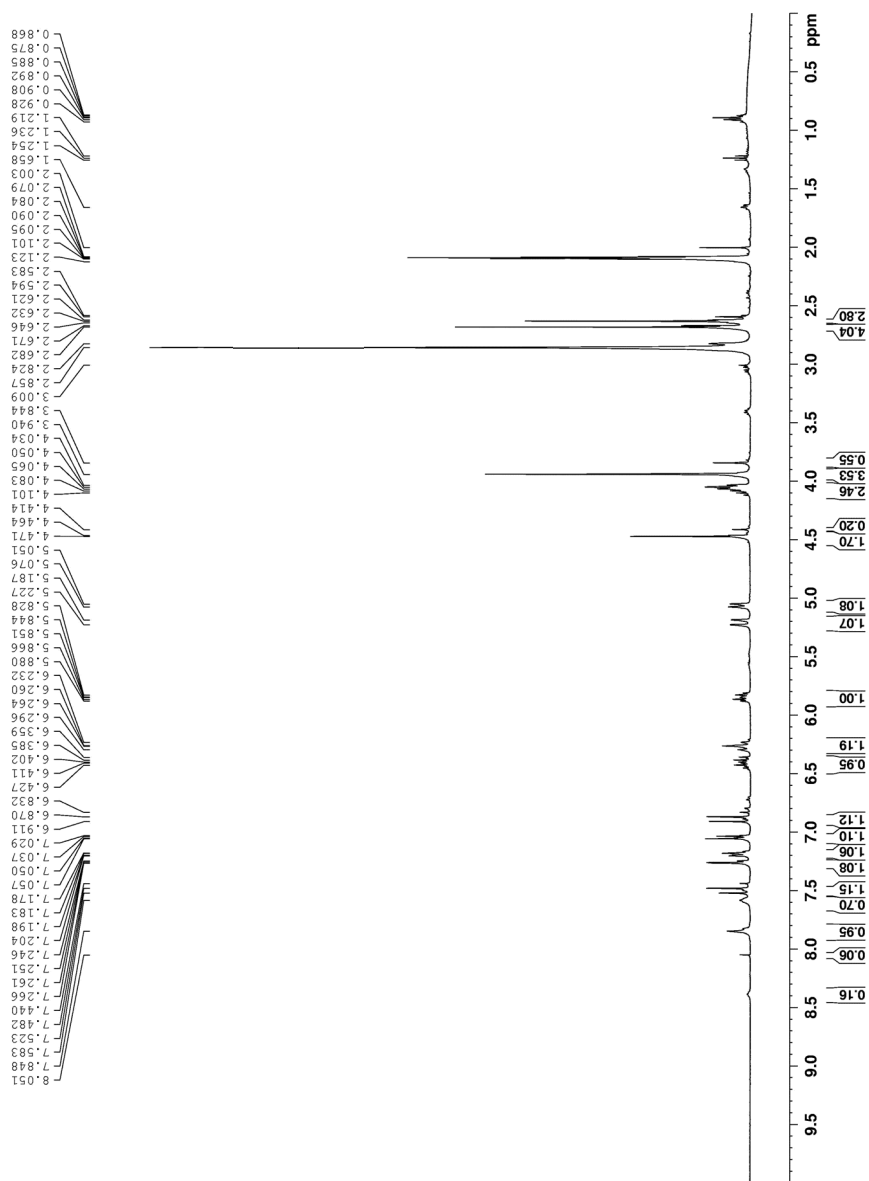

ESI48

### Natural siphonazole 1

natural\_siphonazole

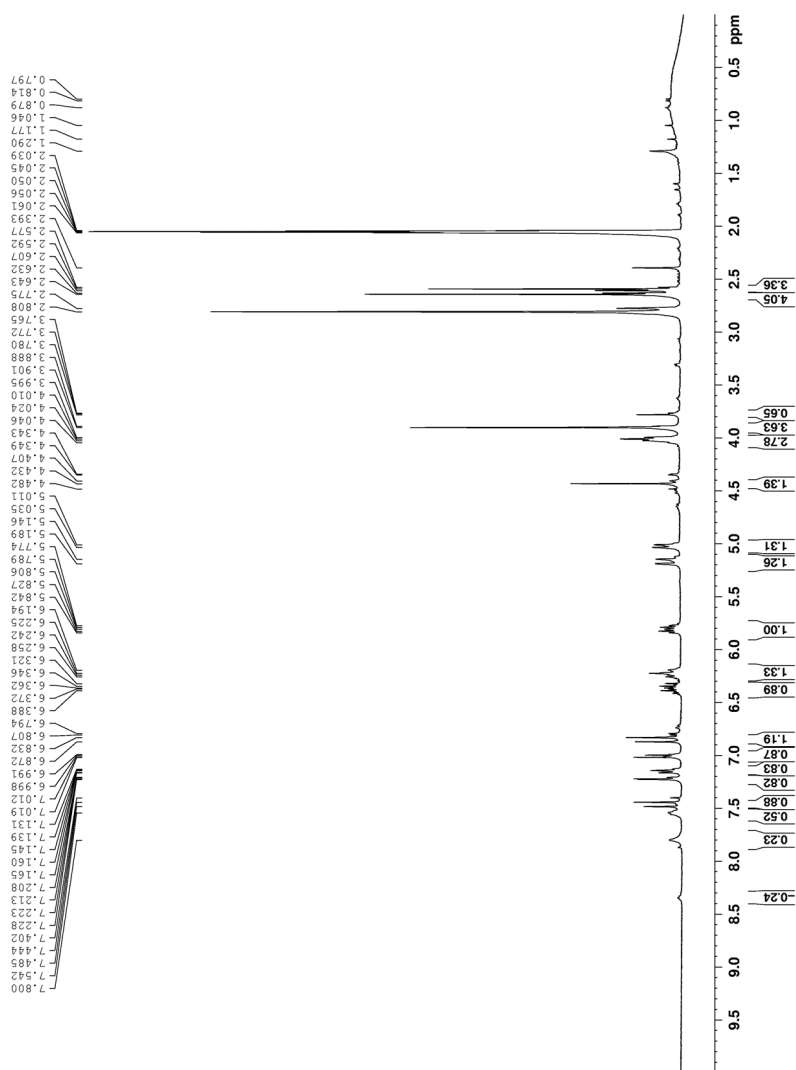



ESI49

### Synthetic siphonazole 1

synthetic siphonazole carbon spectrum, 125 MHz

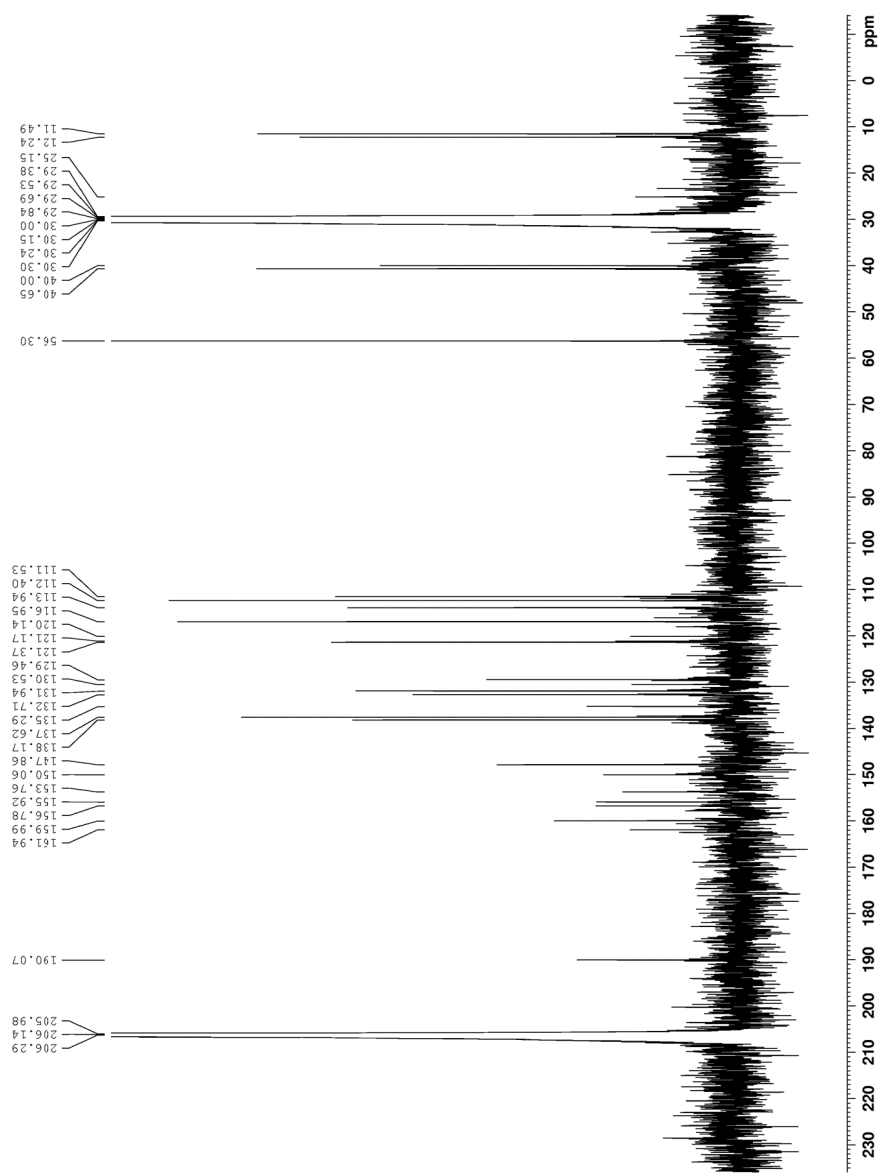



ESI51

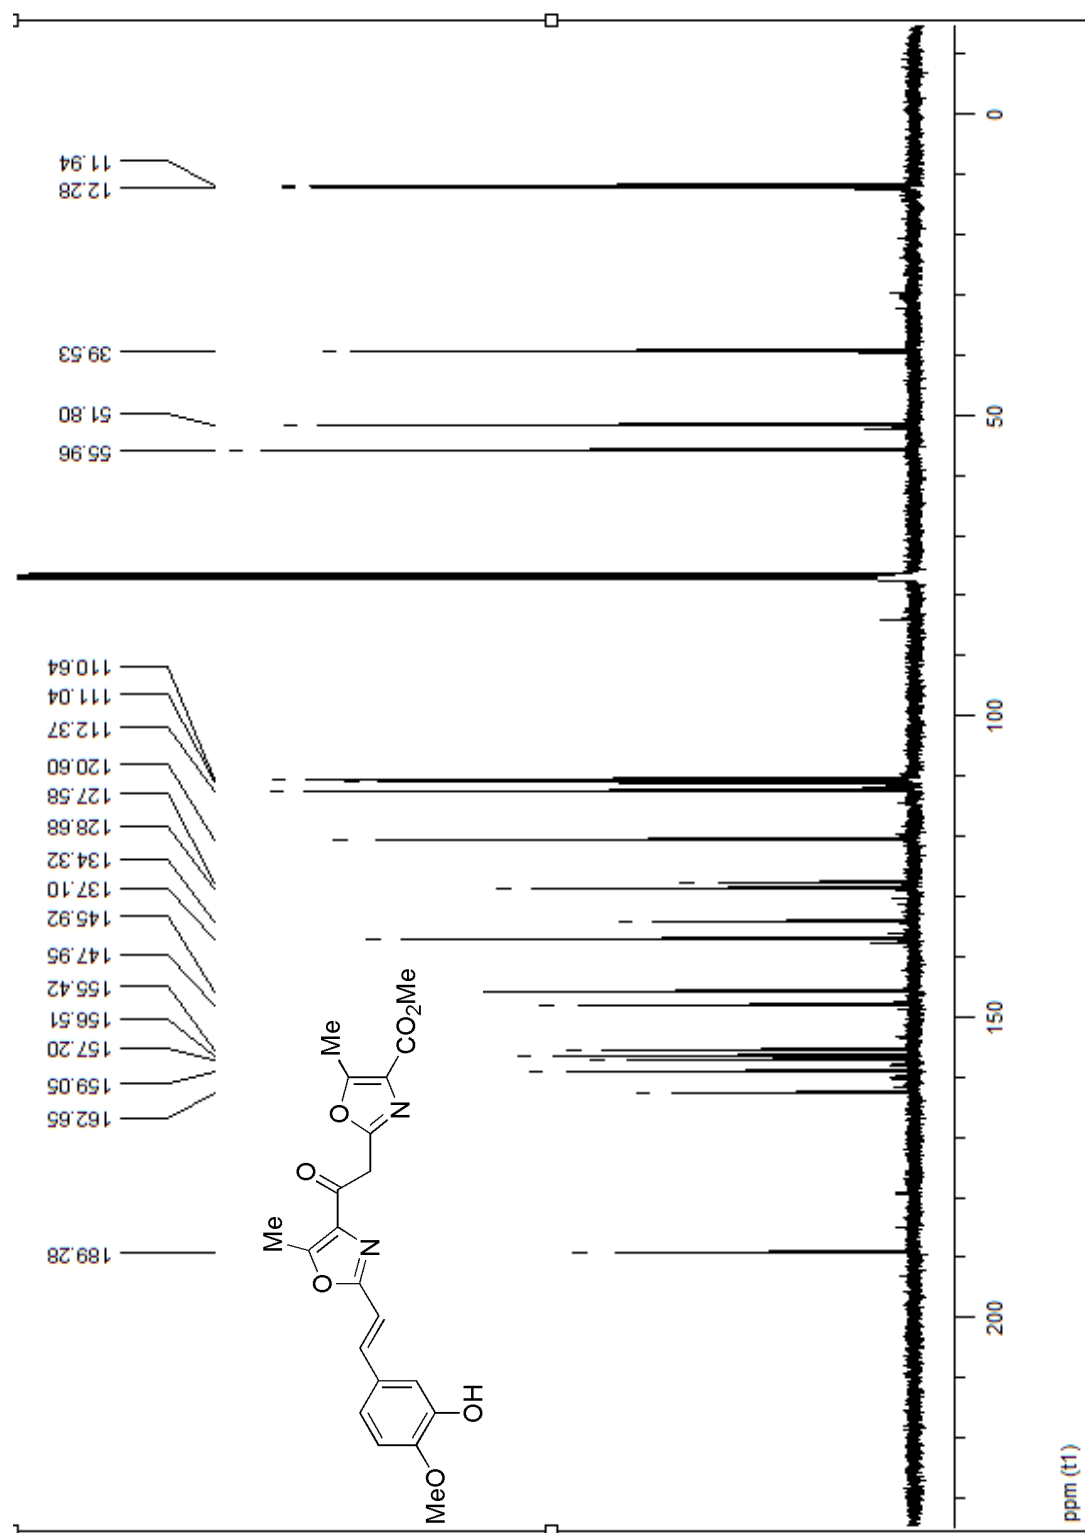



ESI53

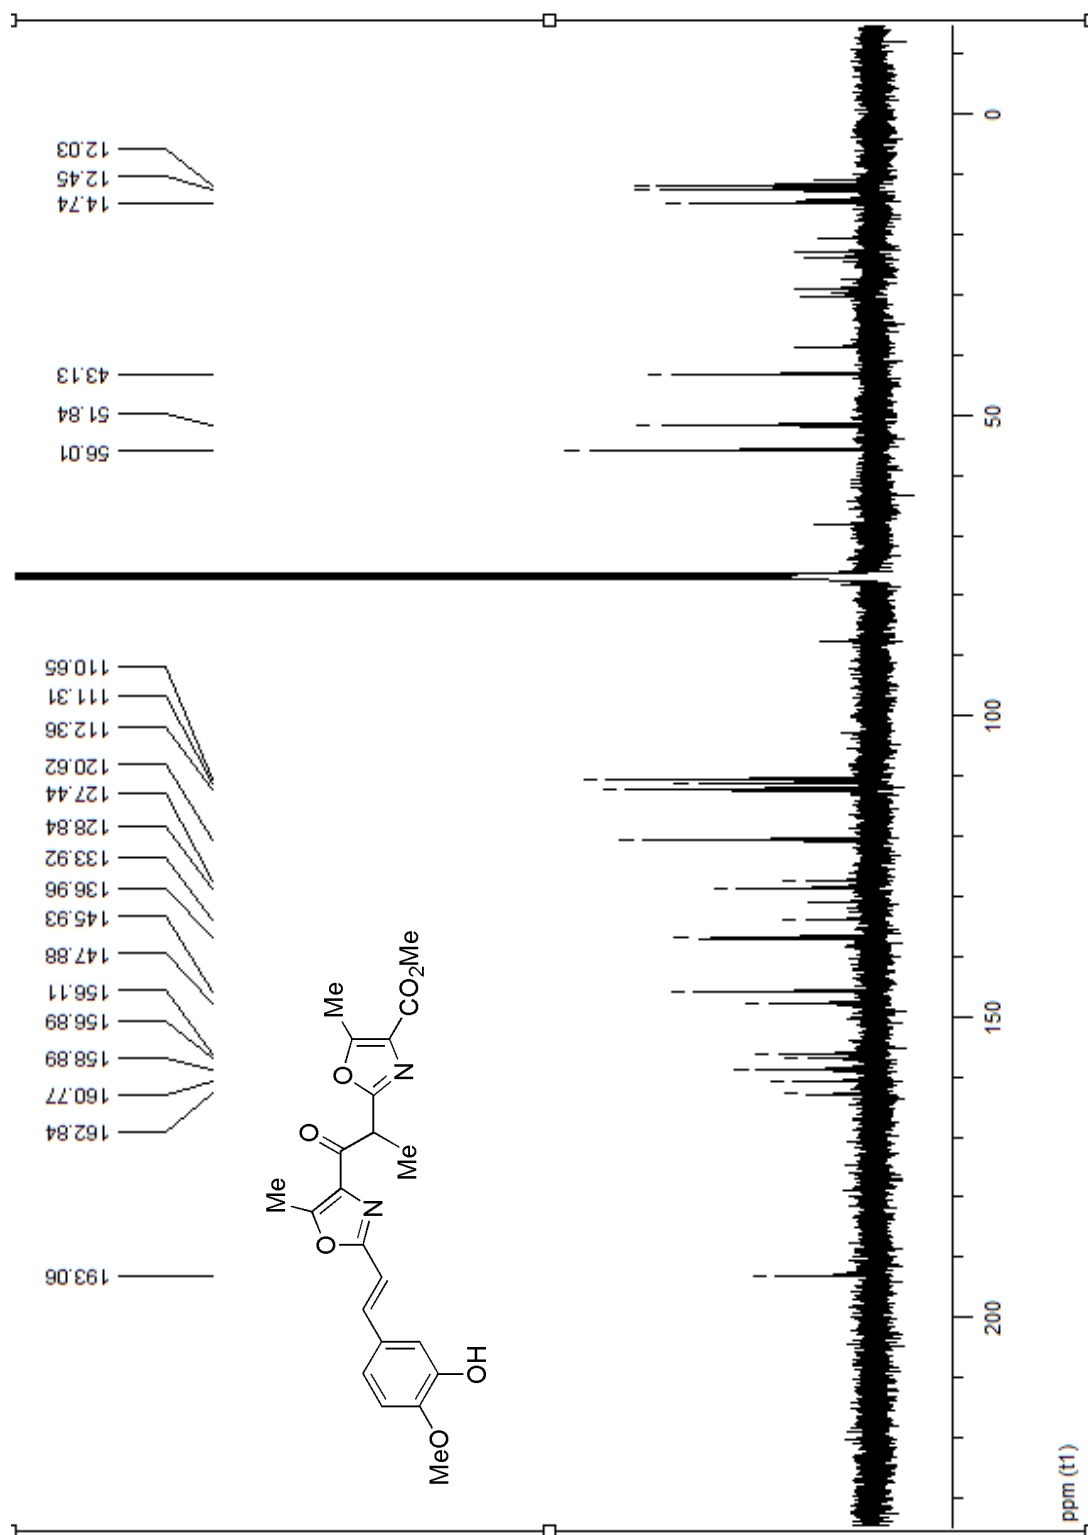

ESI54

**(E)-3-(3,4-Dimethoxyphenyl)acrylamide 4b**

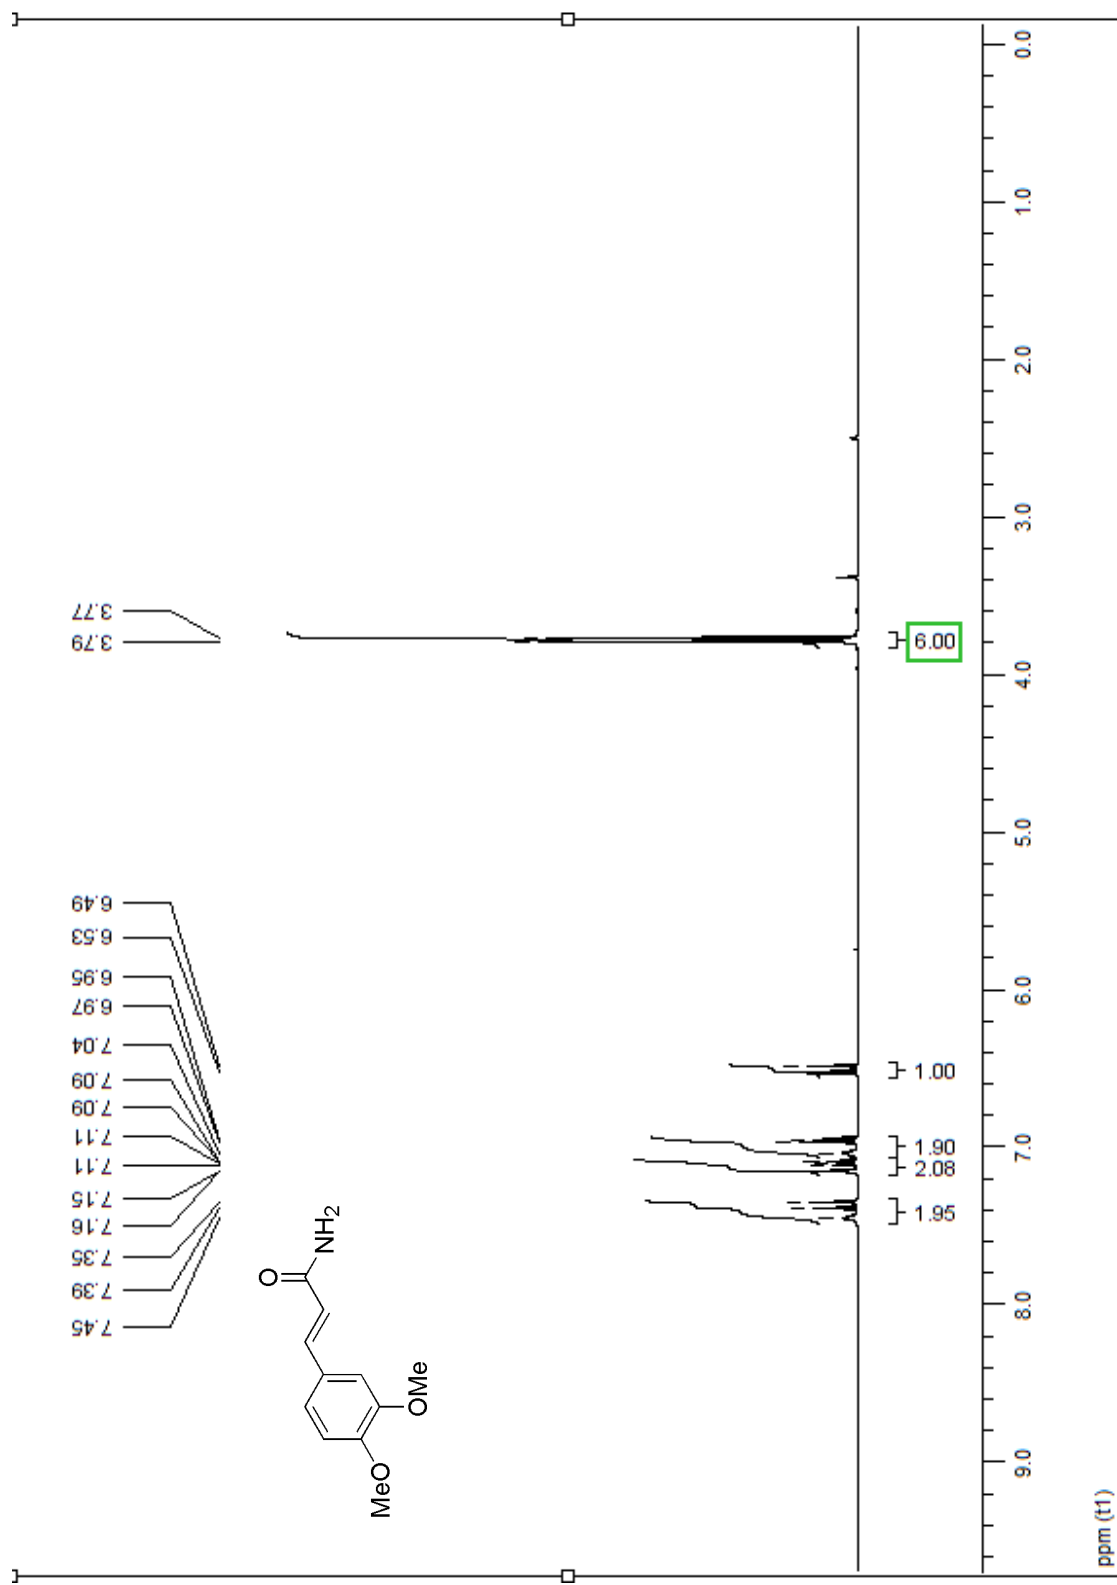

ESI55

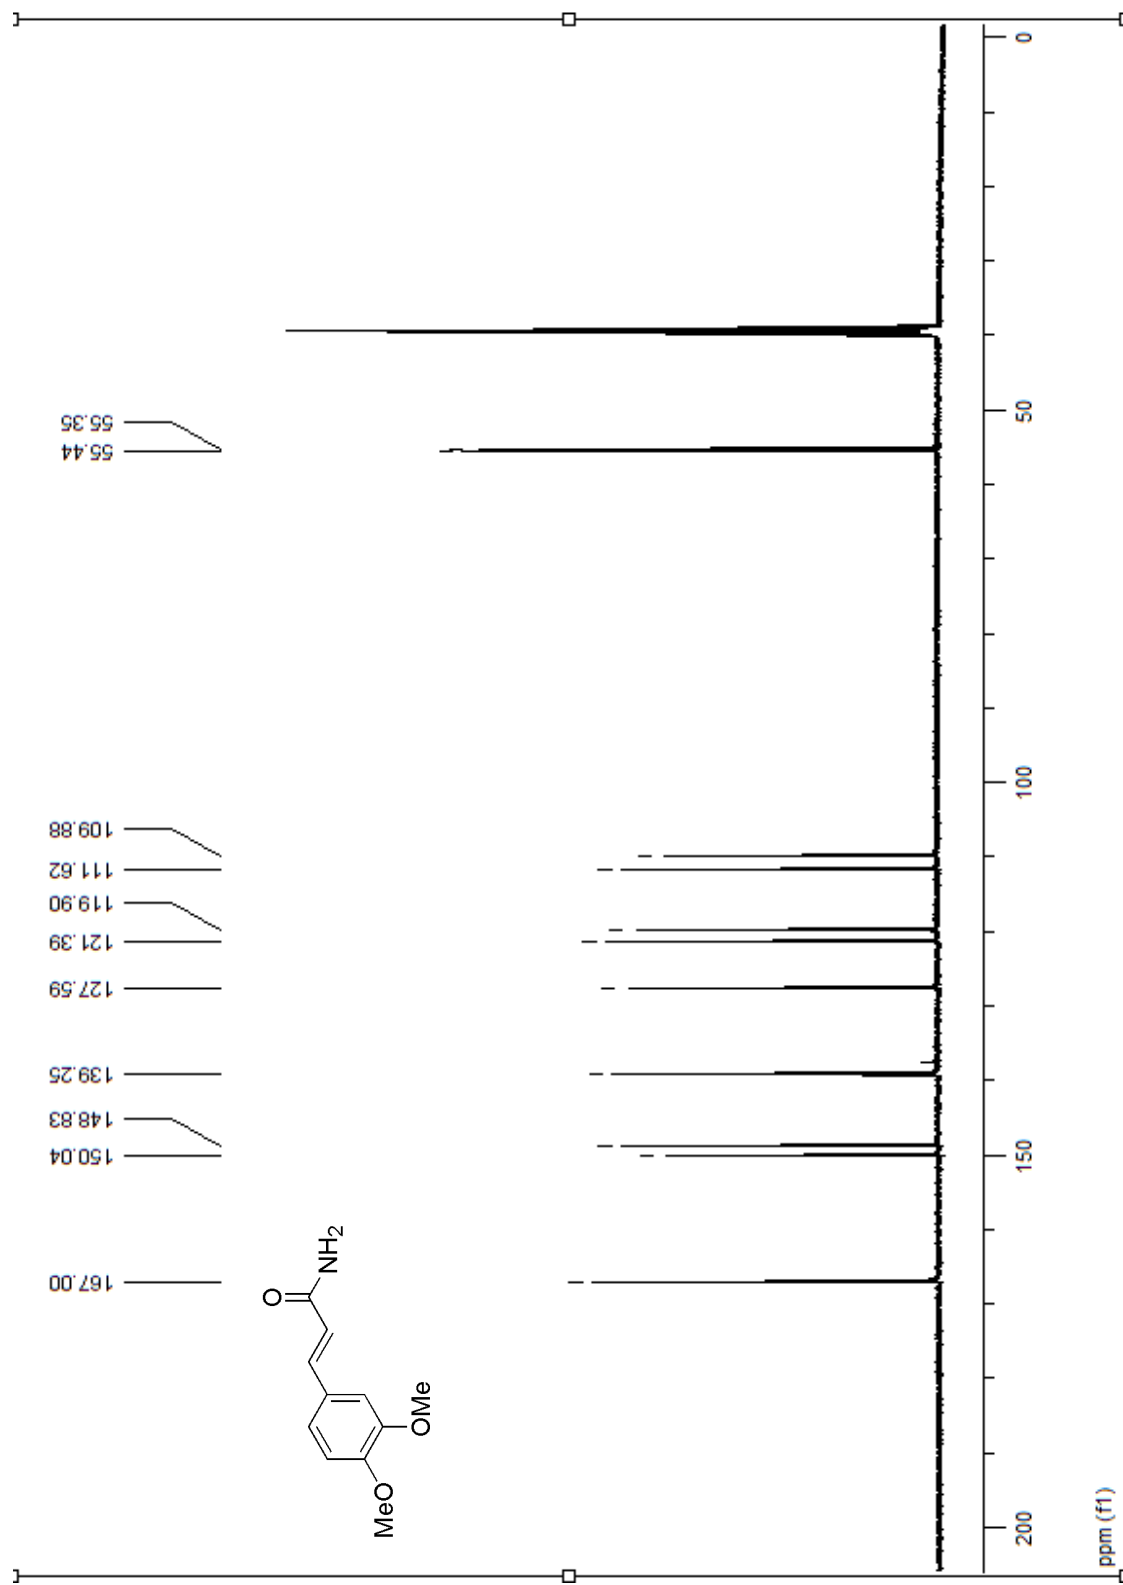

ESI56

**(E)-Methyl 2-(3-(3,4-dimethoxyphenyl)acrylamido)-3-oxobutanoate 5b**

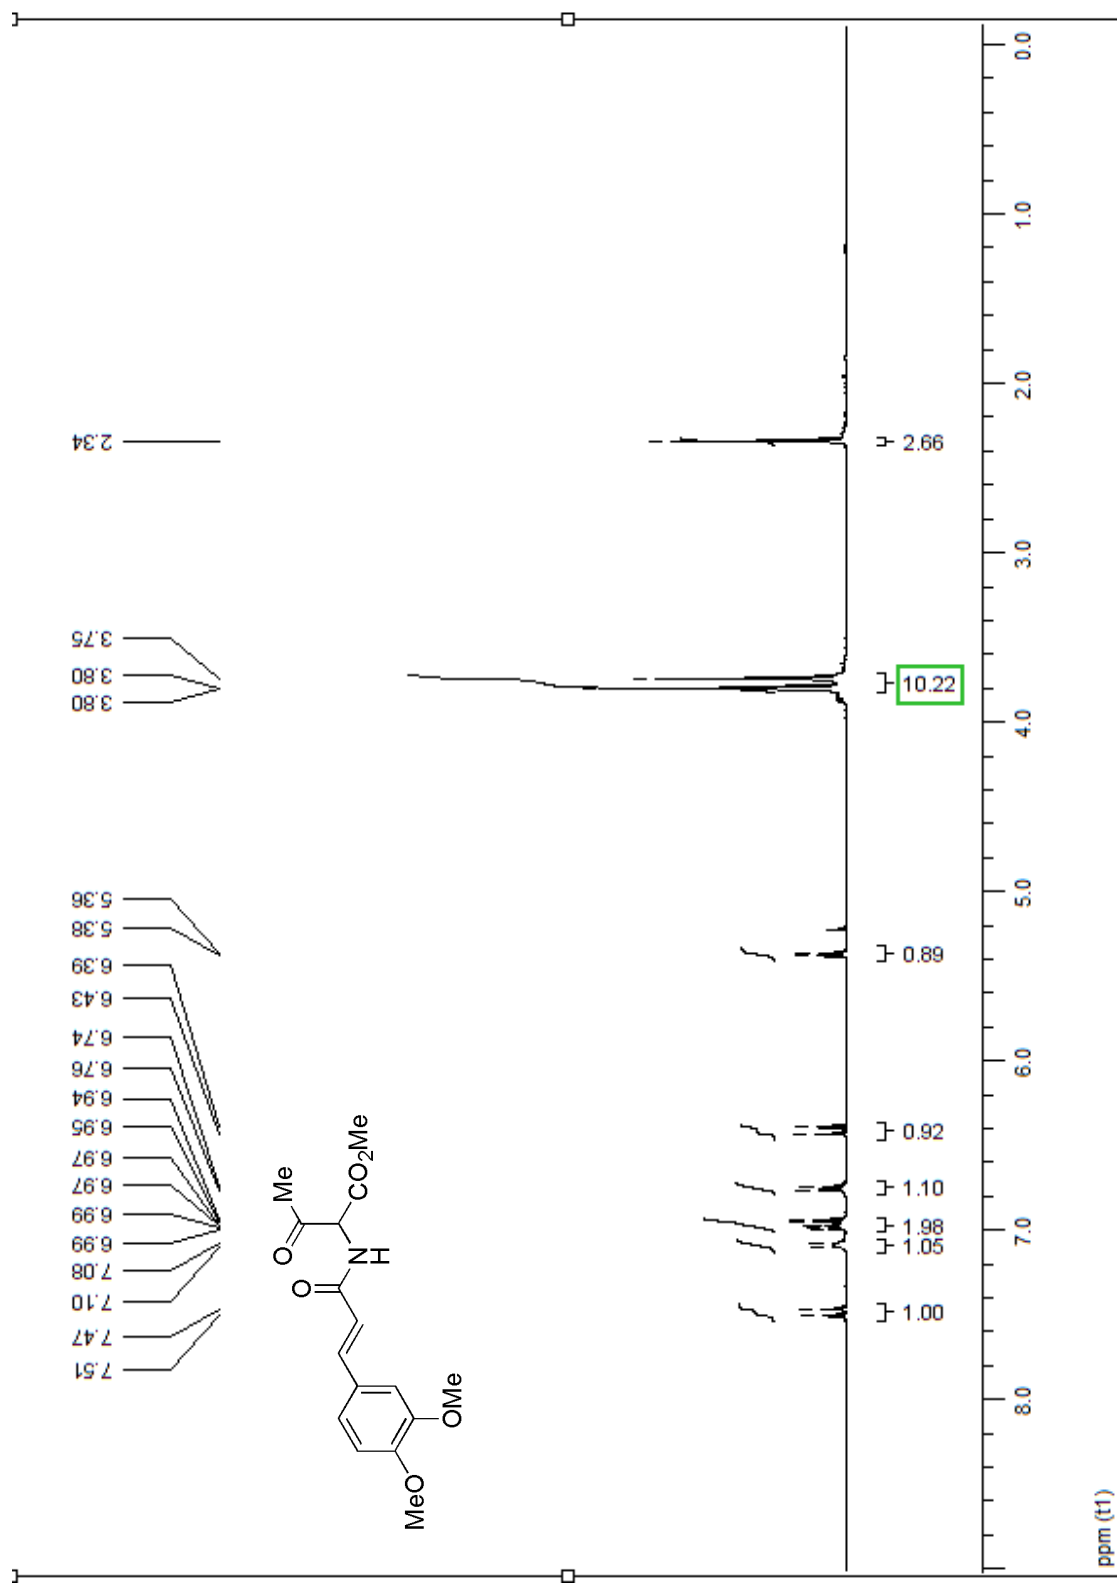



ESI57

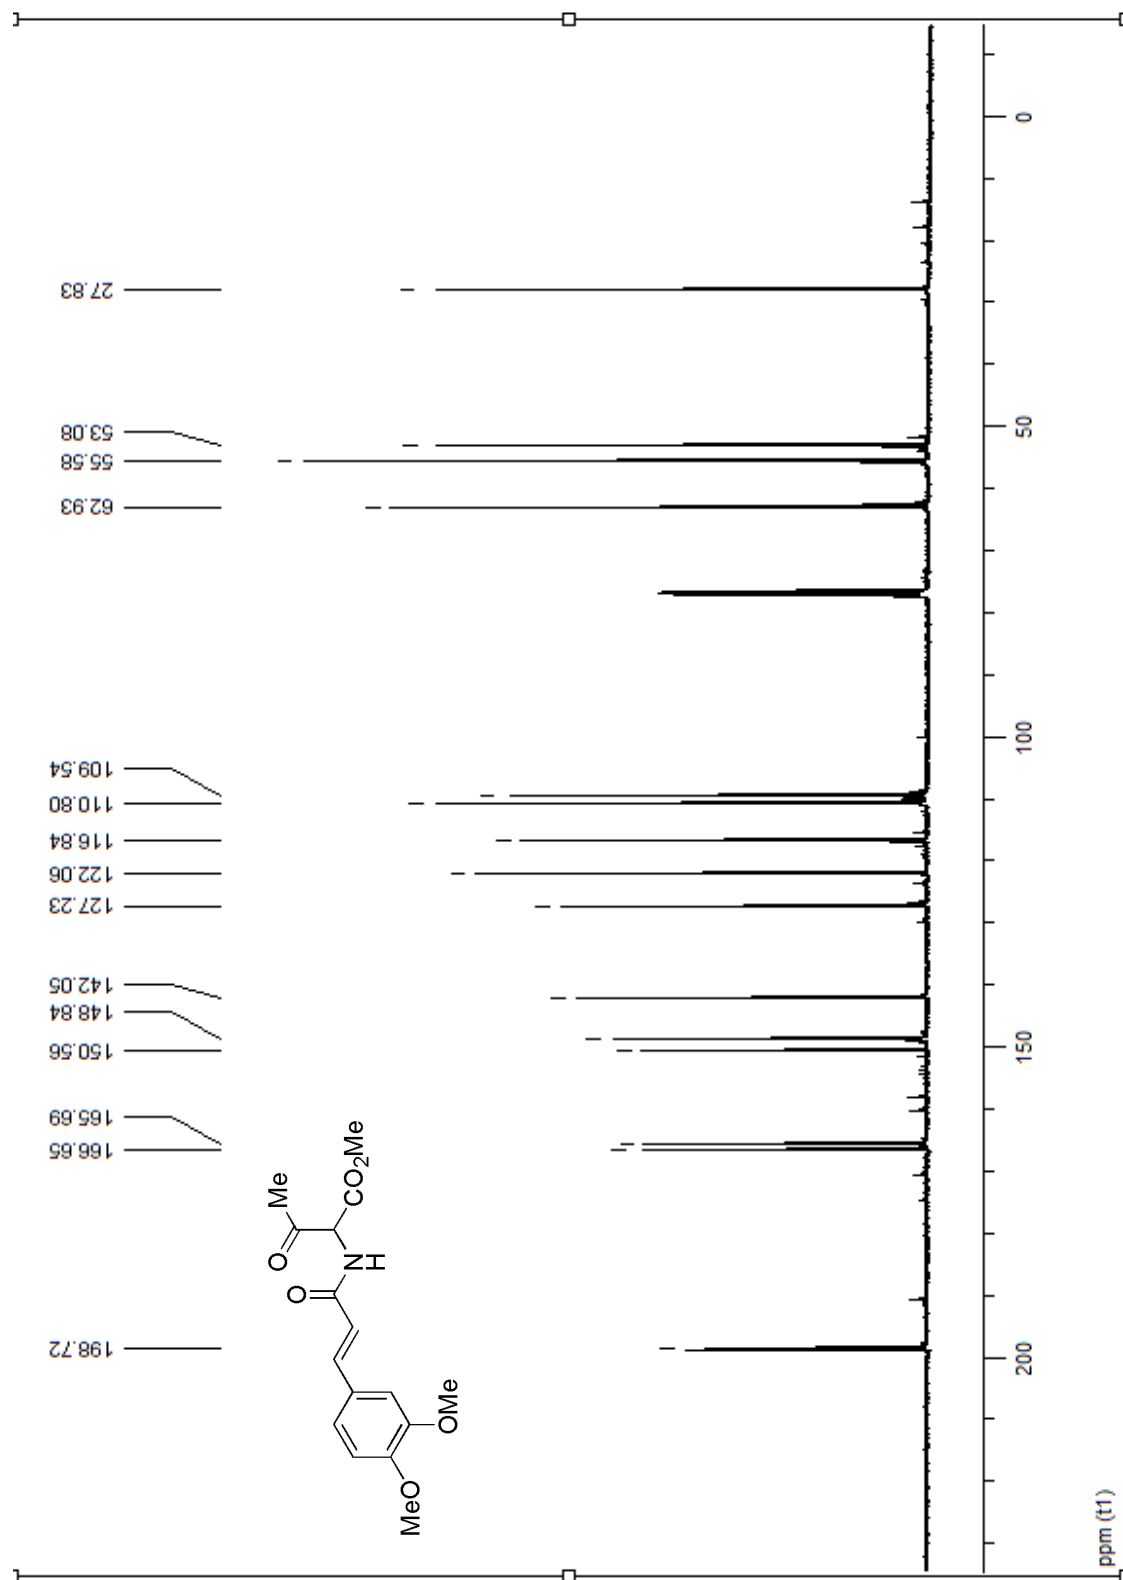

ESI58

**(E)-Methyl 2-(3,4-dimethoxystyryl)-5-methyloxazole-4-carboxylate 6b**

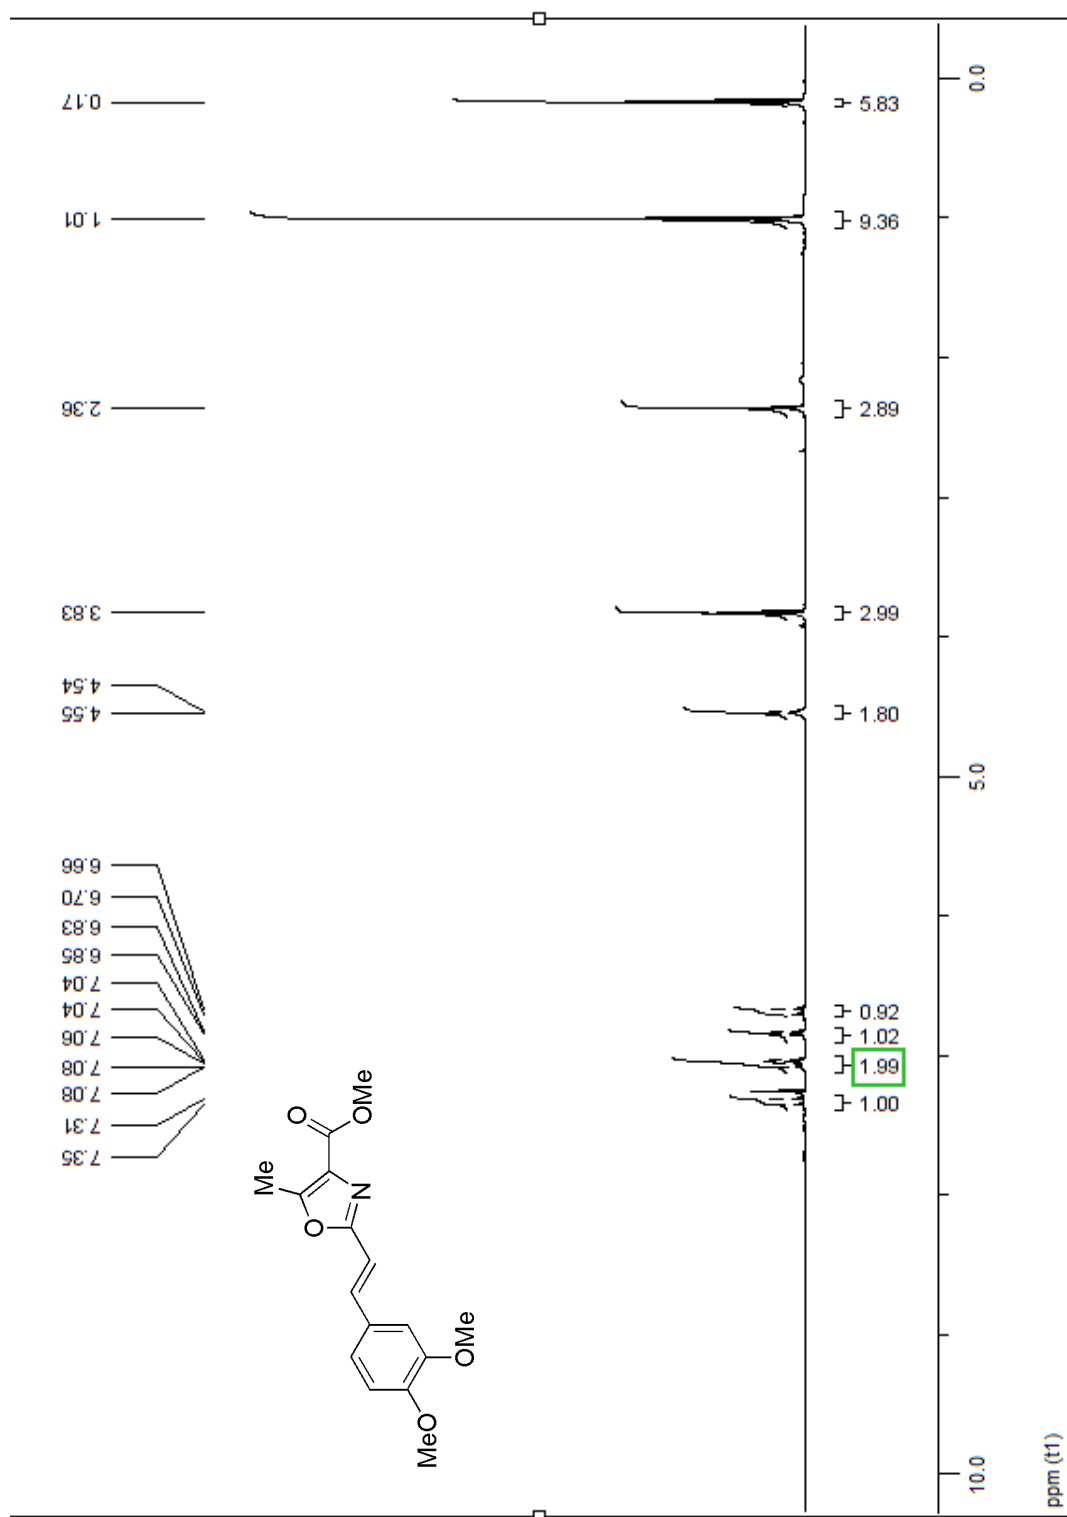

ESI59

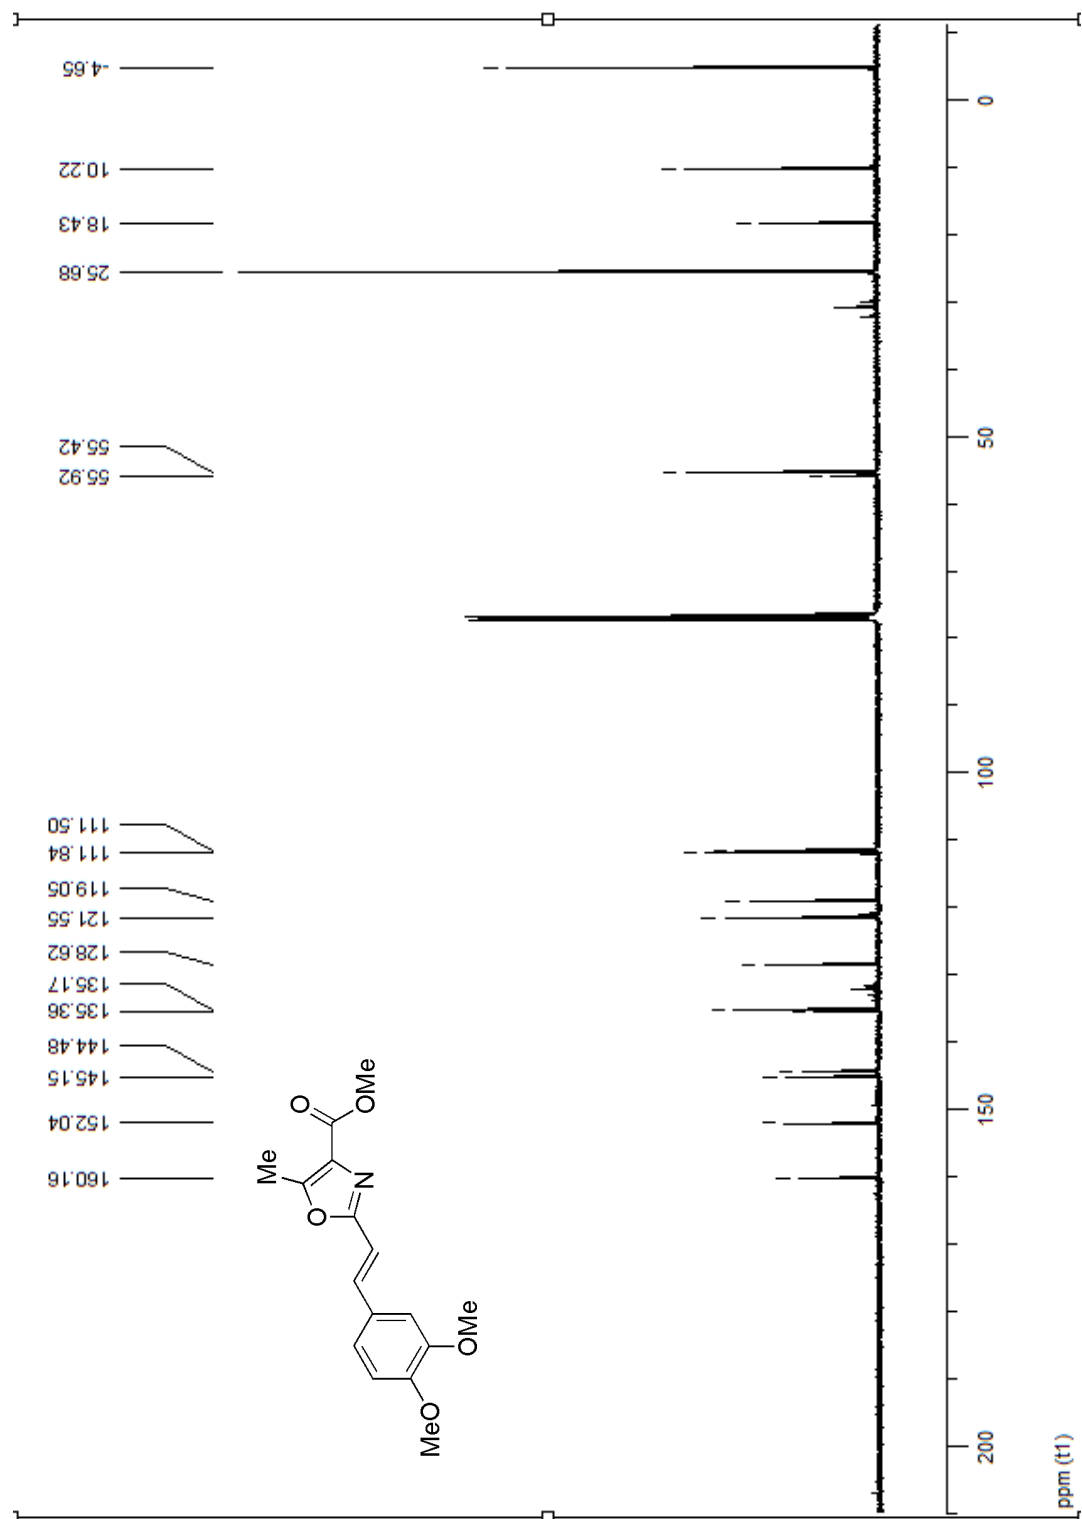

ESI60

2-(3,4-Dimethoxystyryl)-5-methyloxazol-4-yl)methanol 7b

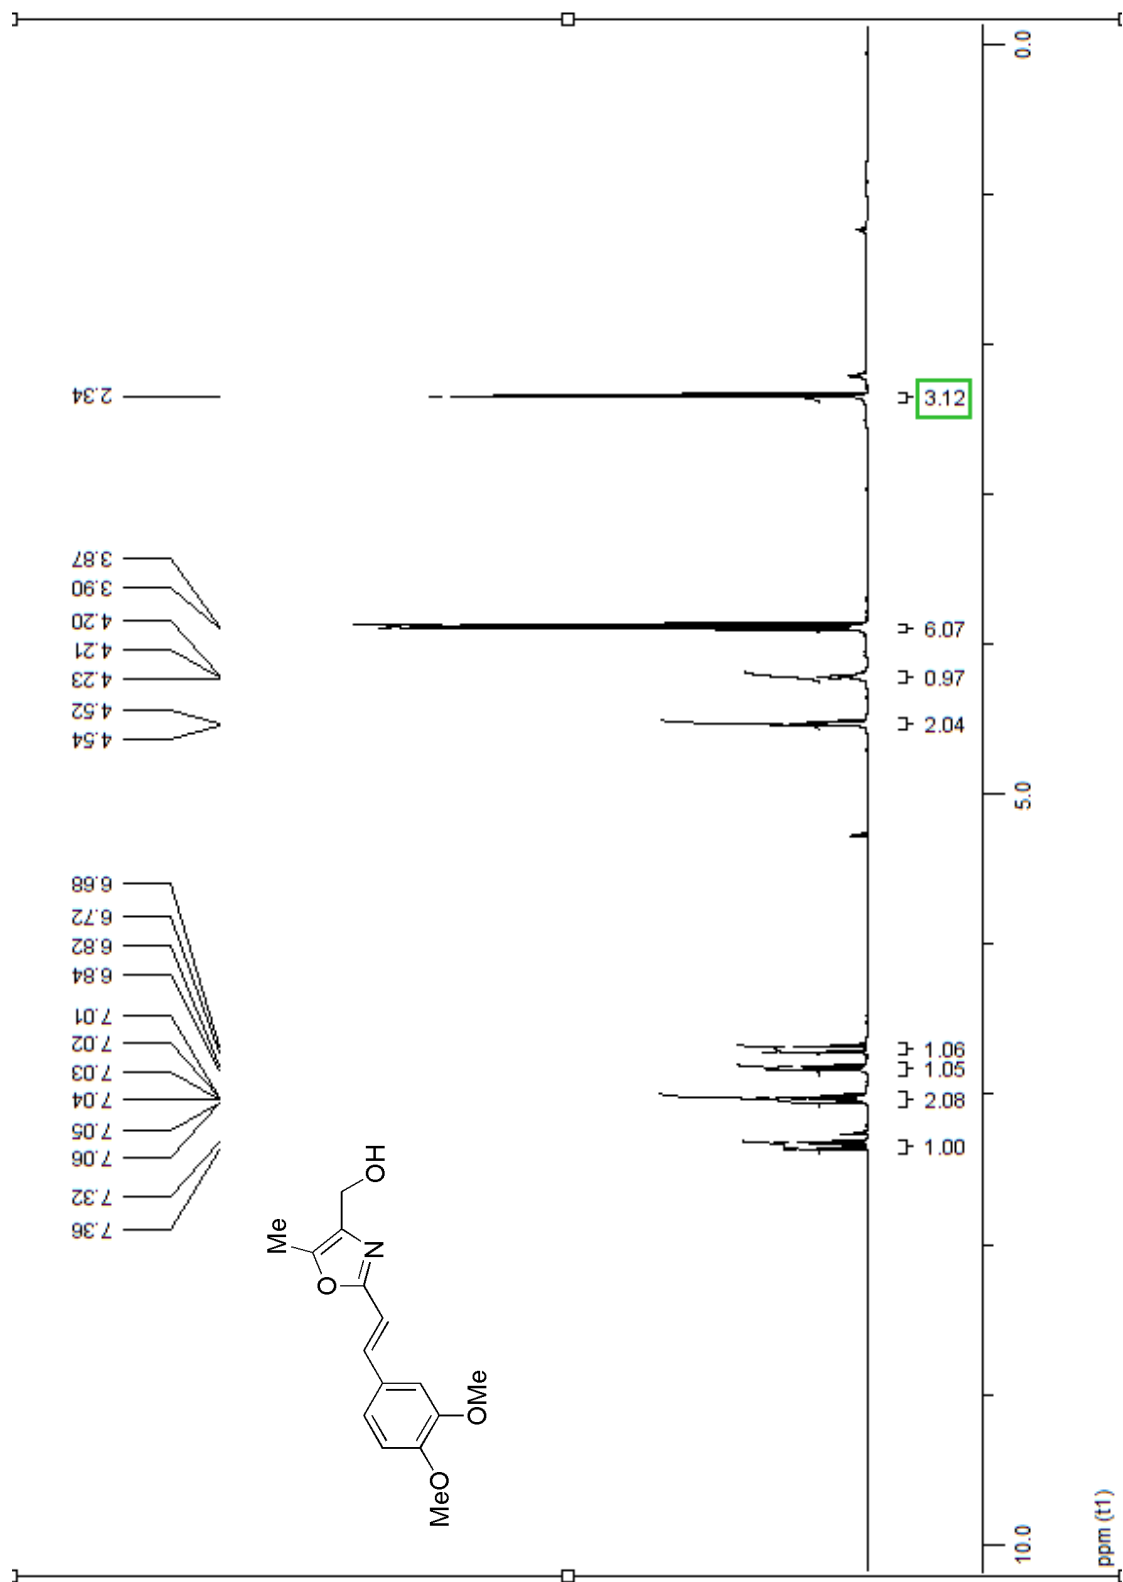

ESI61

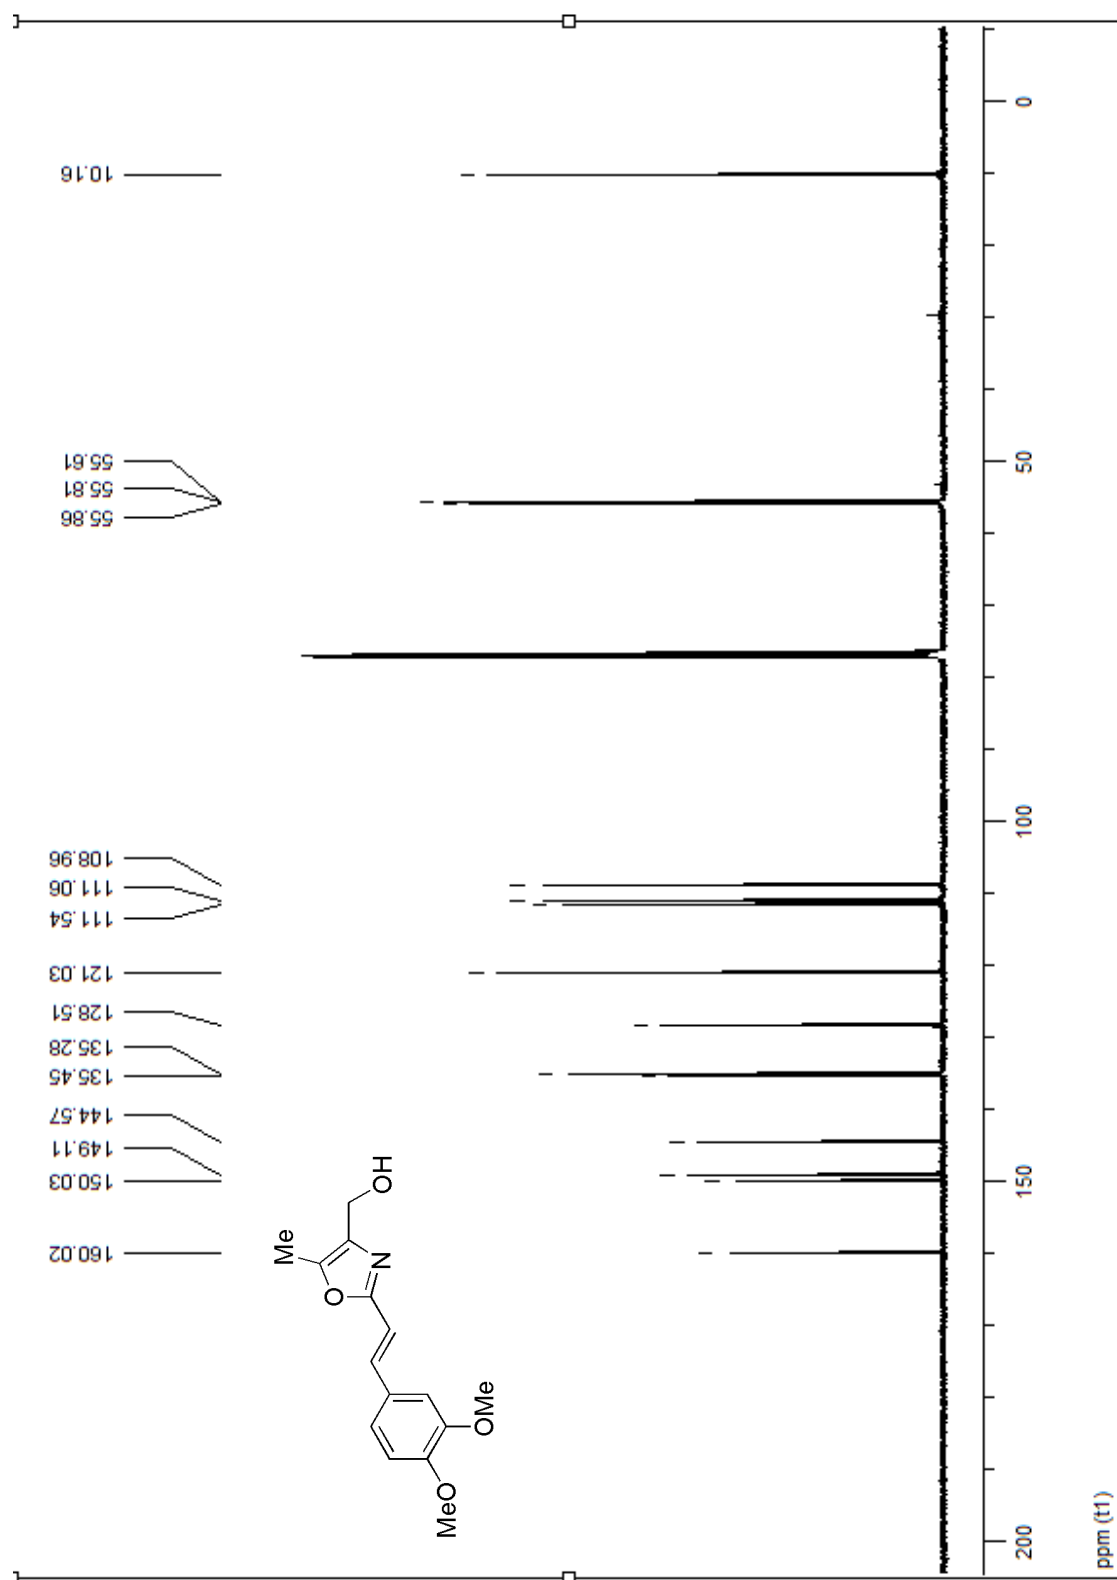

ESI62

2-(3,4-Dimethoxystyryl)-5-methylisoxazole-4-carbaldehyde 8b

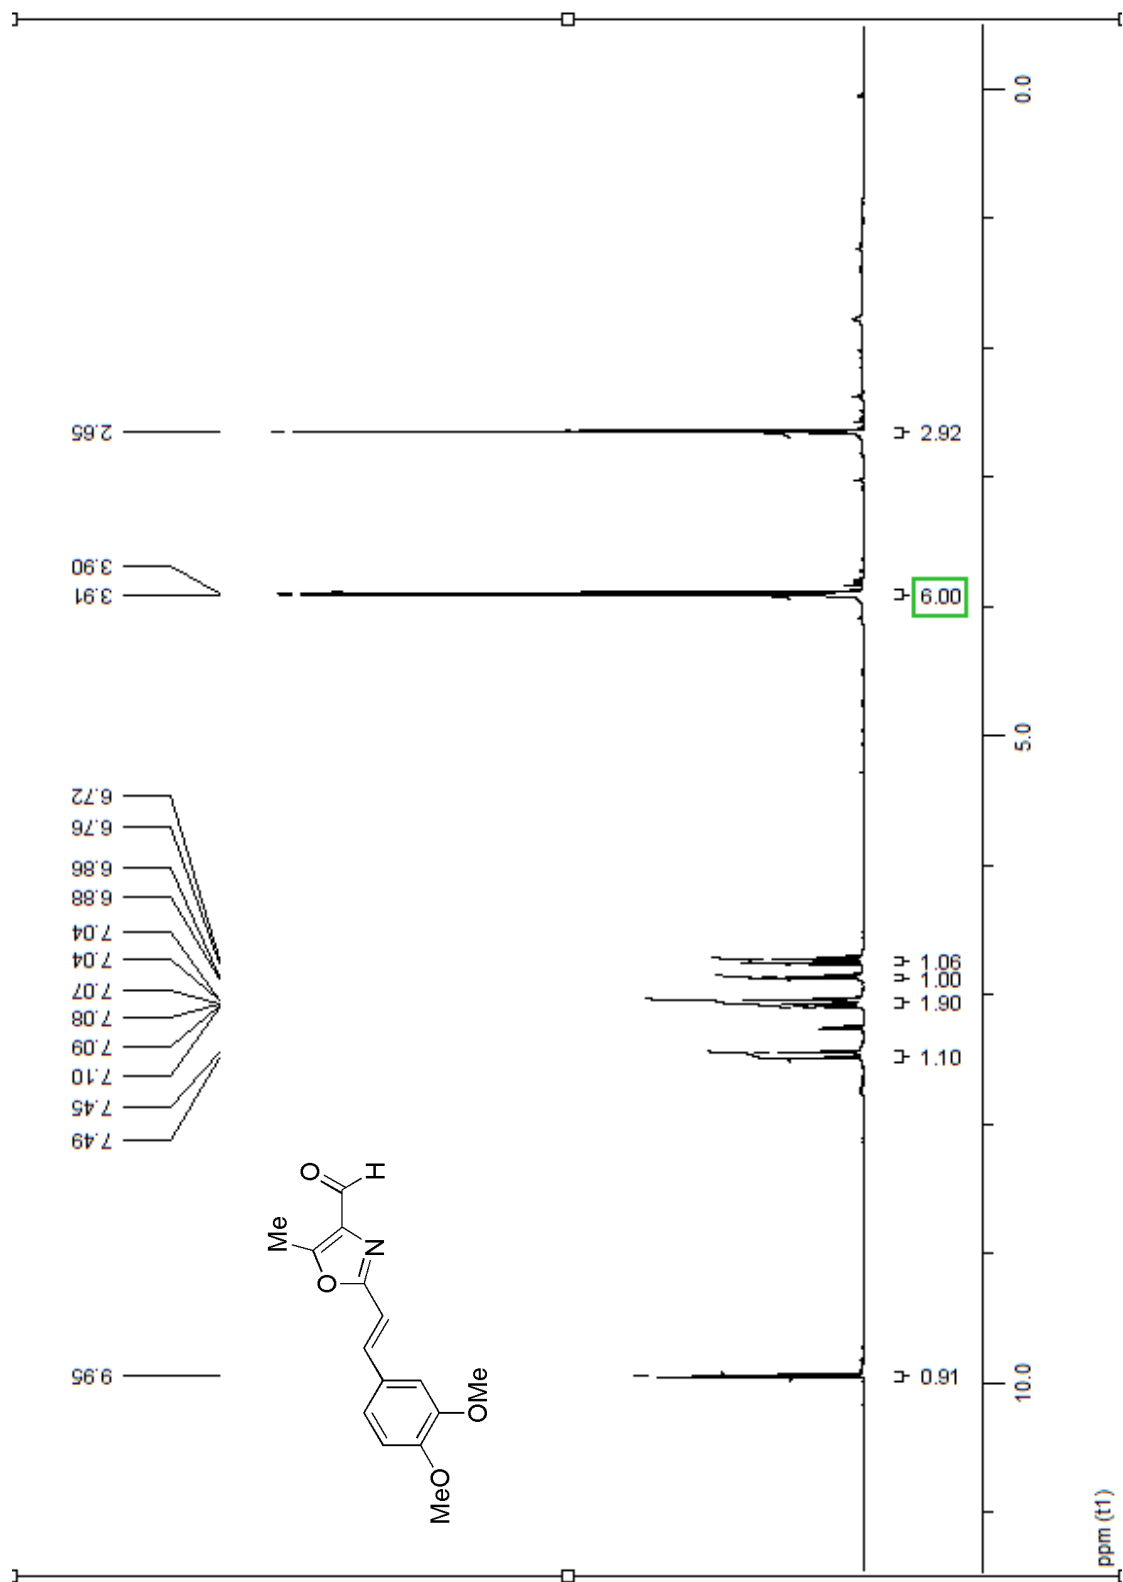

ESI63

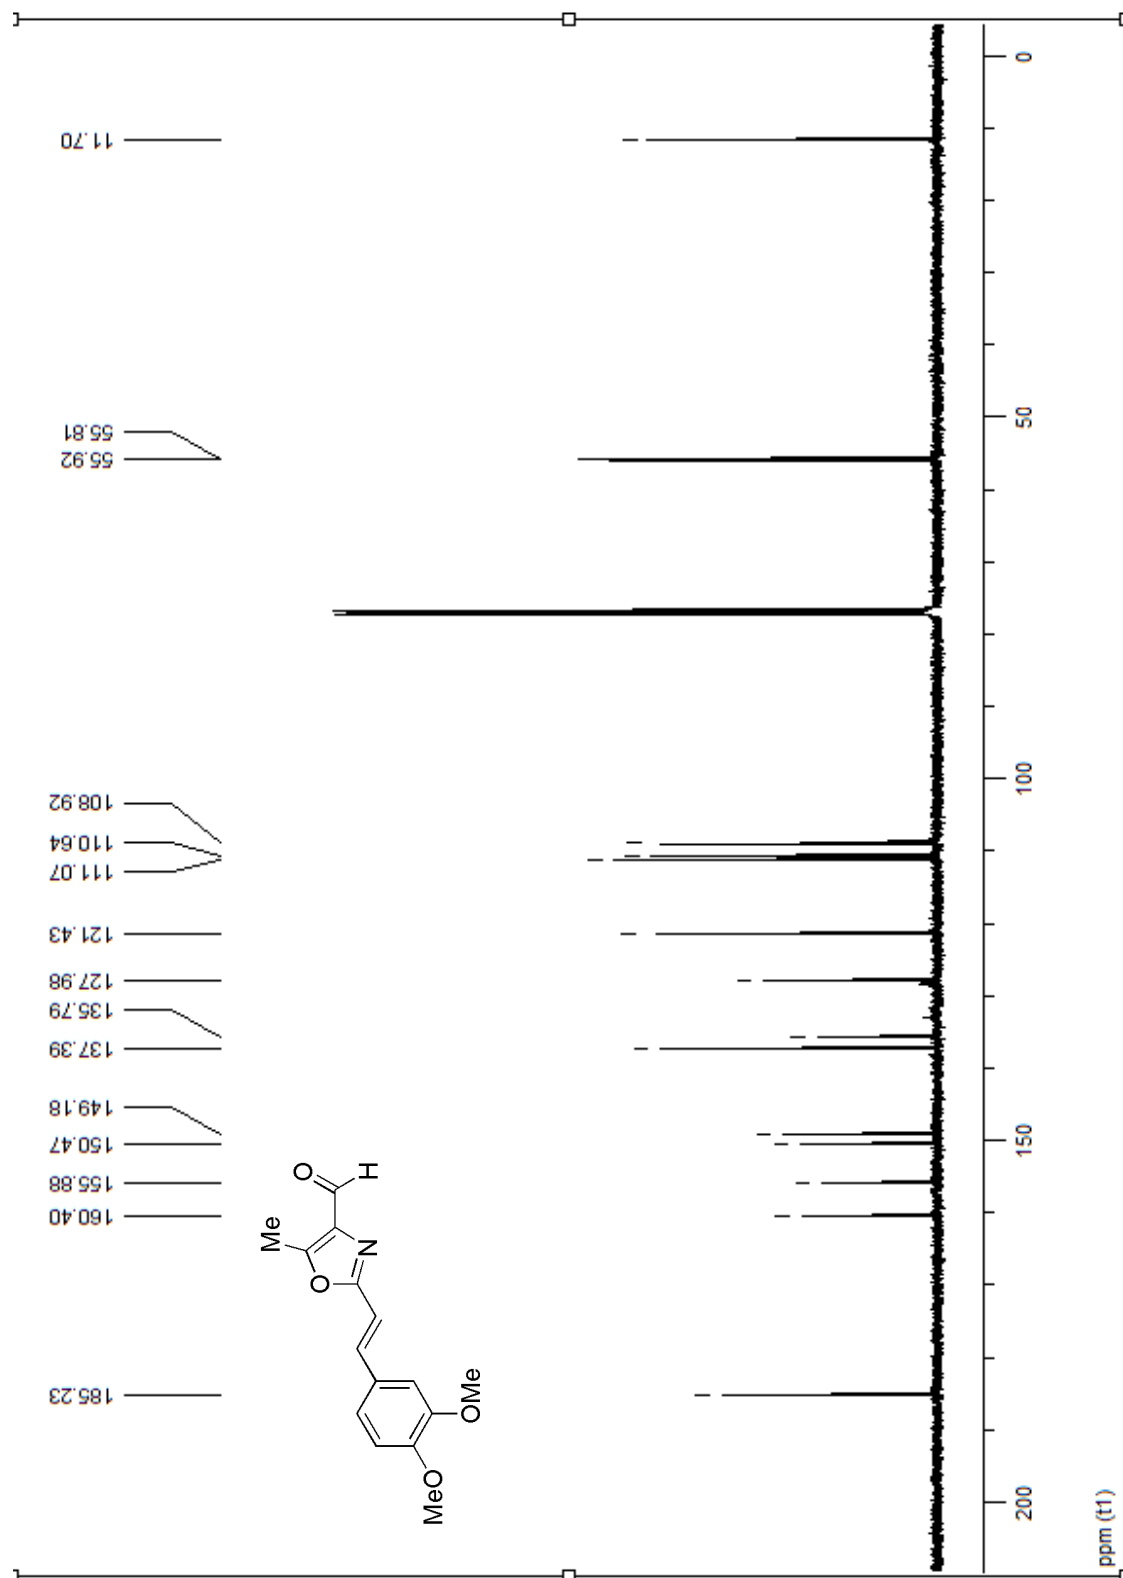

ESI64

*N*-Methoxy-*N*-methyl-2-(3,4-dimethoxystyryl)-5-methyloxazole-4-carboxamide

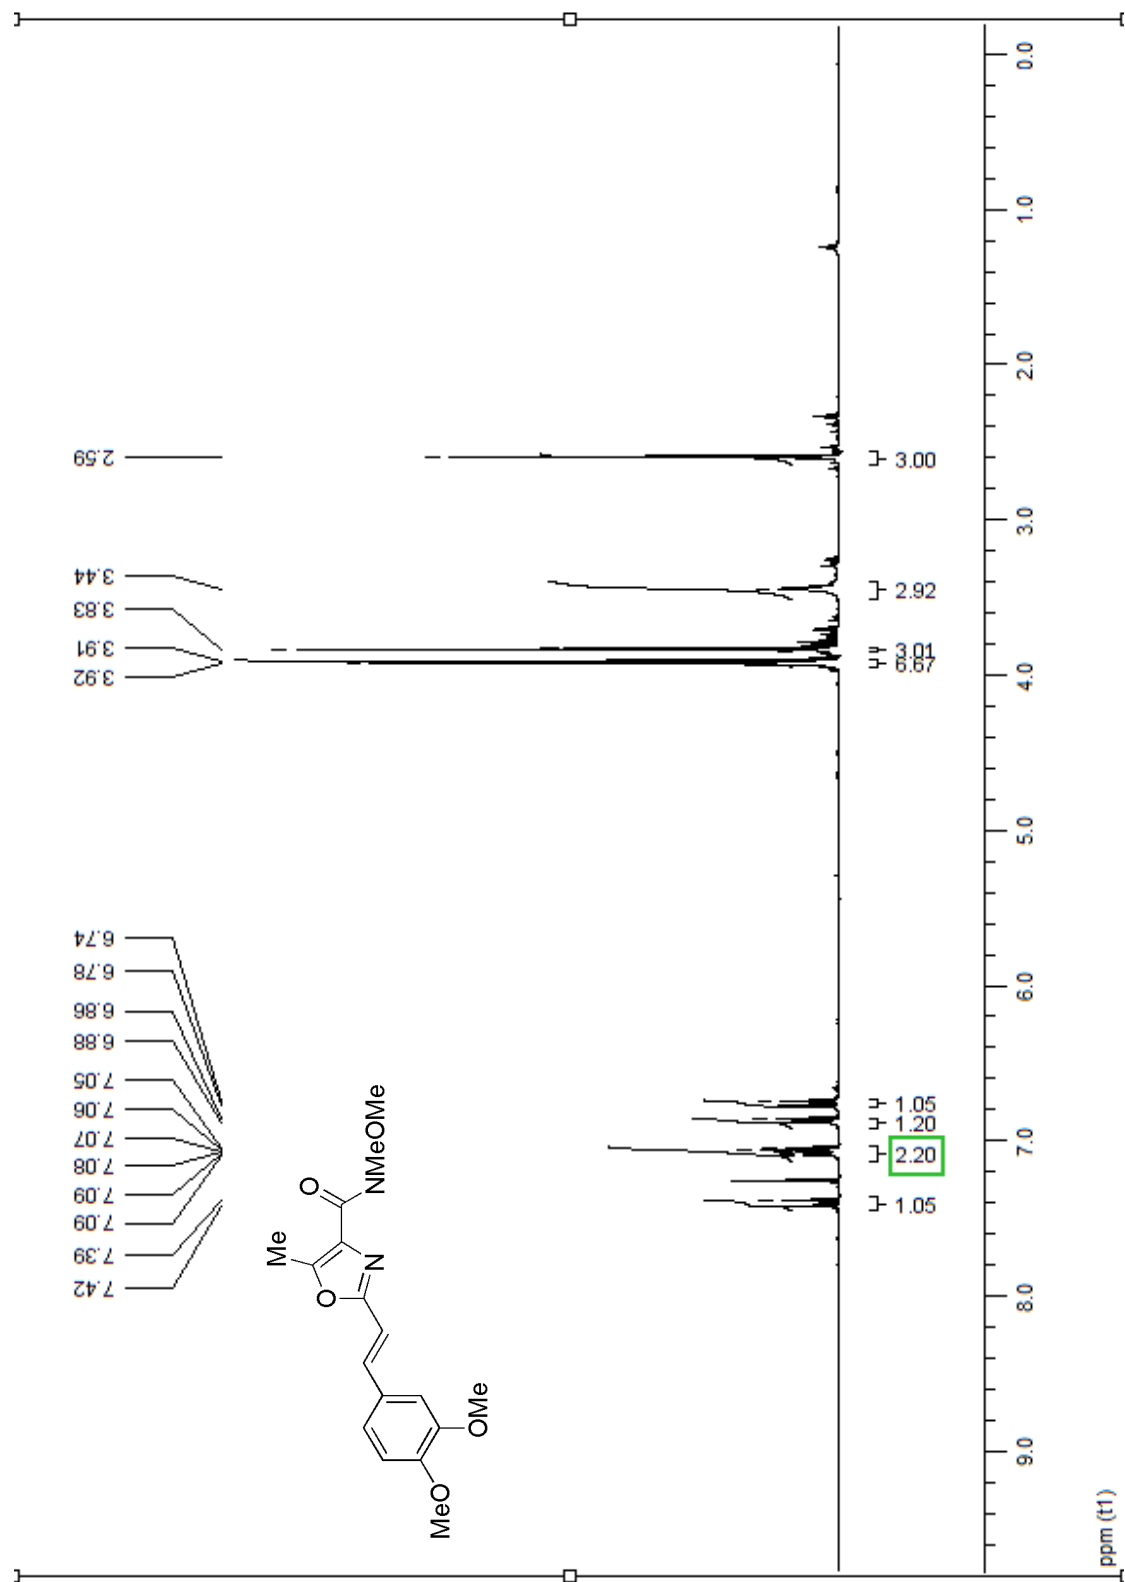



ESI65

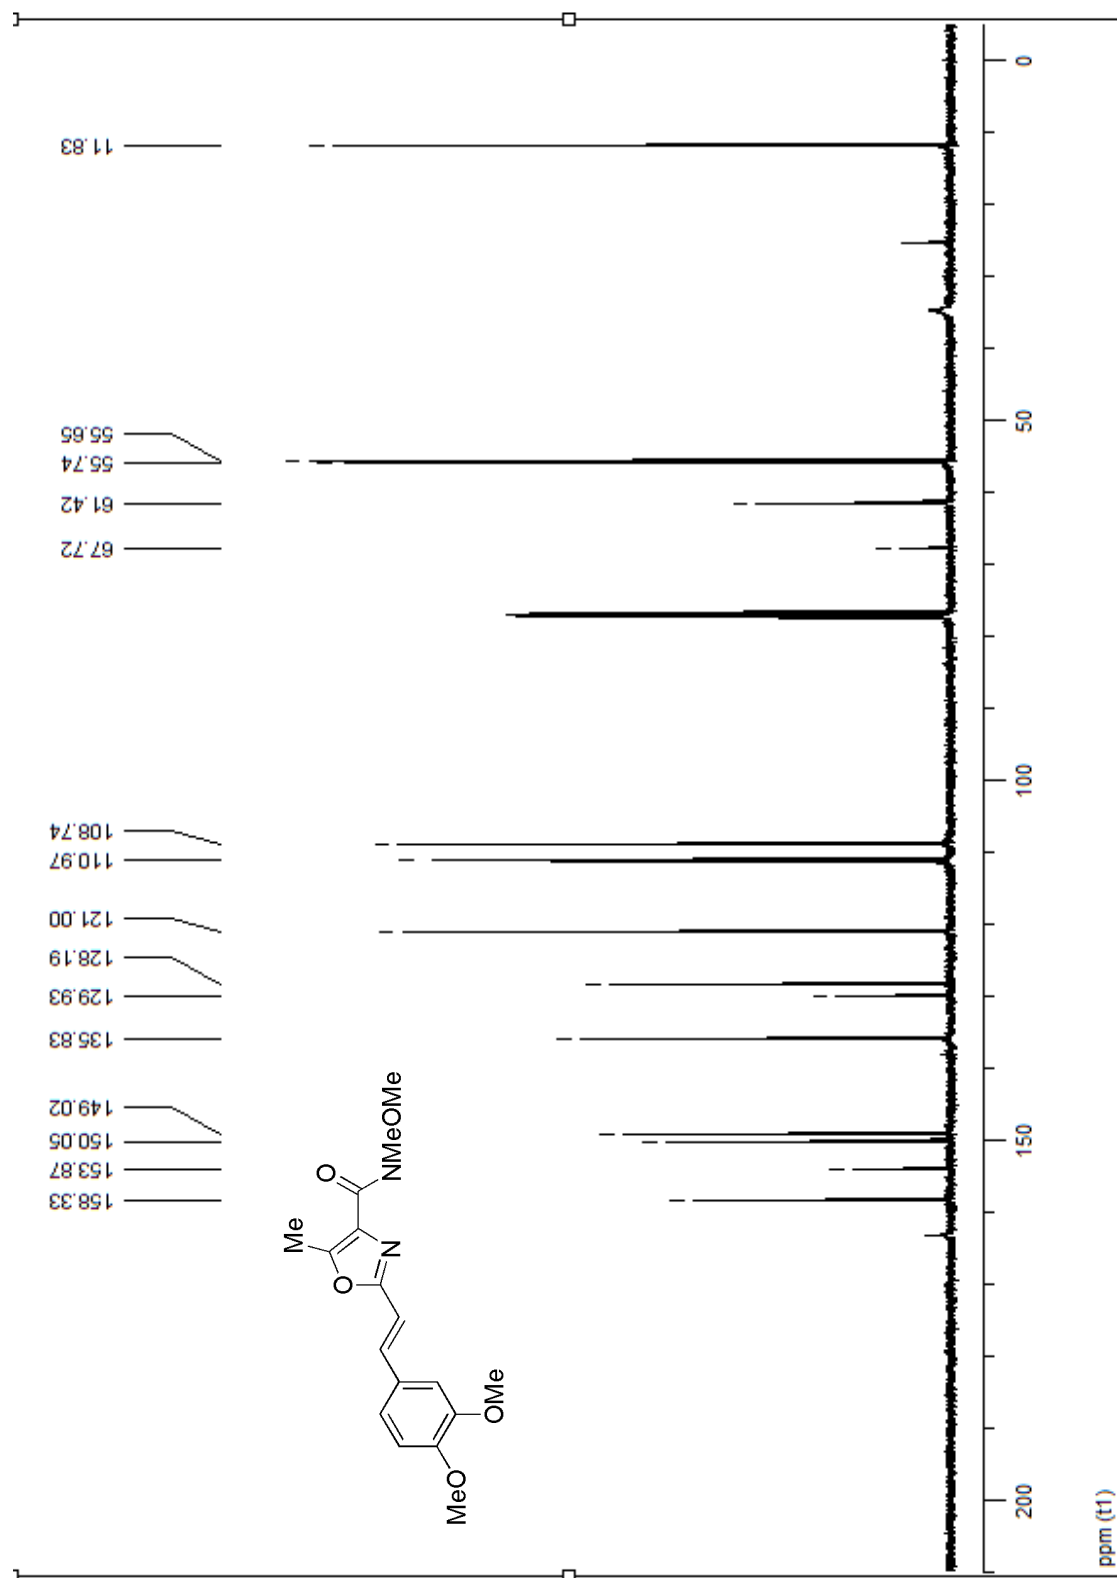

ESI66

**(E)-3-(3,4-Dimethoxyphenyl)acrylonitrile 9b**

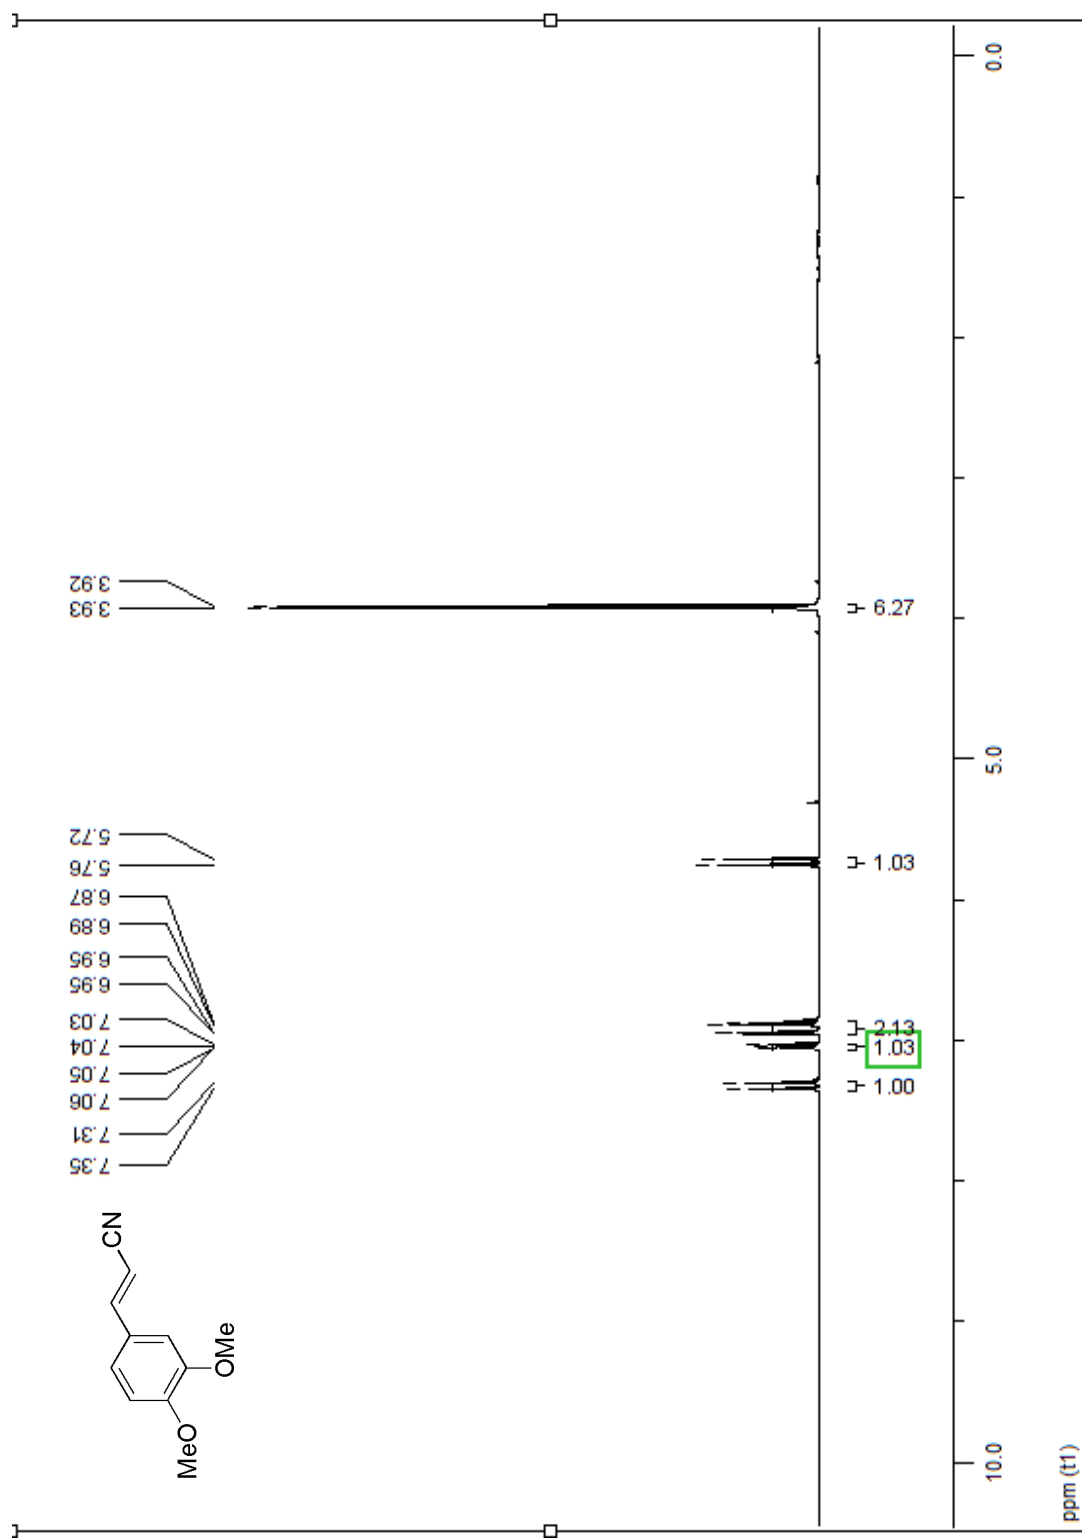

ESI67

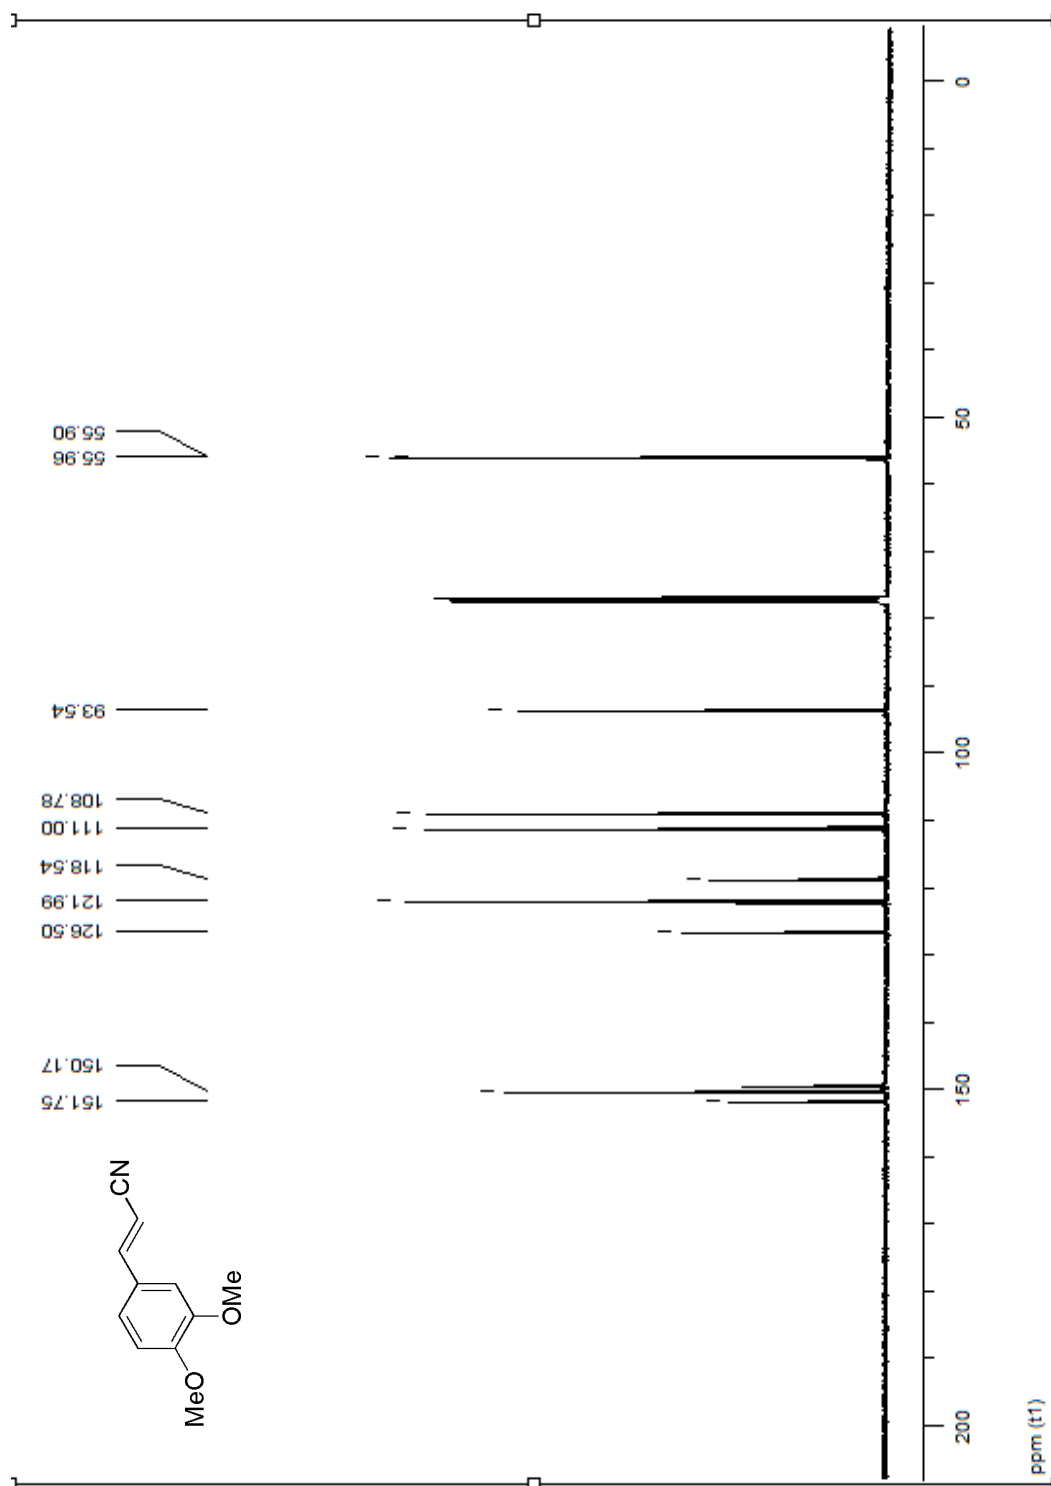

ESI68

Methyl 2-(2-(3,4-dimethoxystyryl)-5-methyloxazol-4-yl)-2-hydroxyethyl)-5-methyloxazole-4-carboxylate 17b

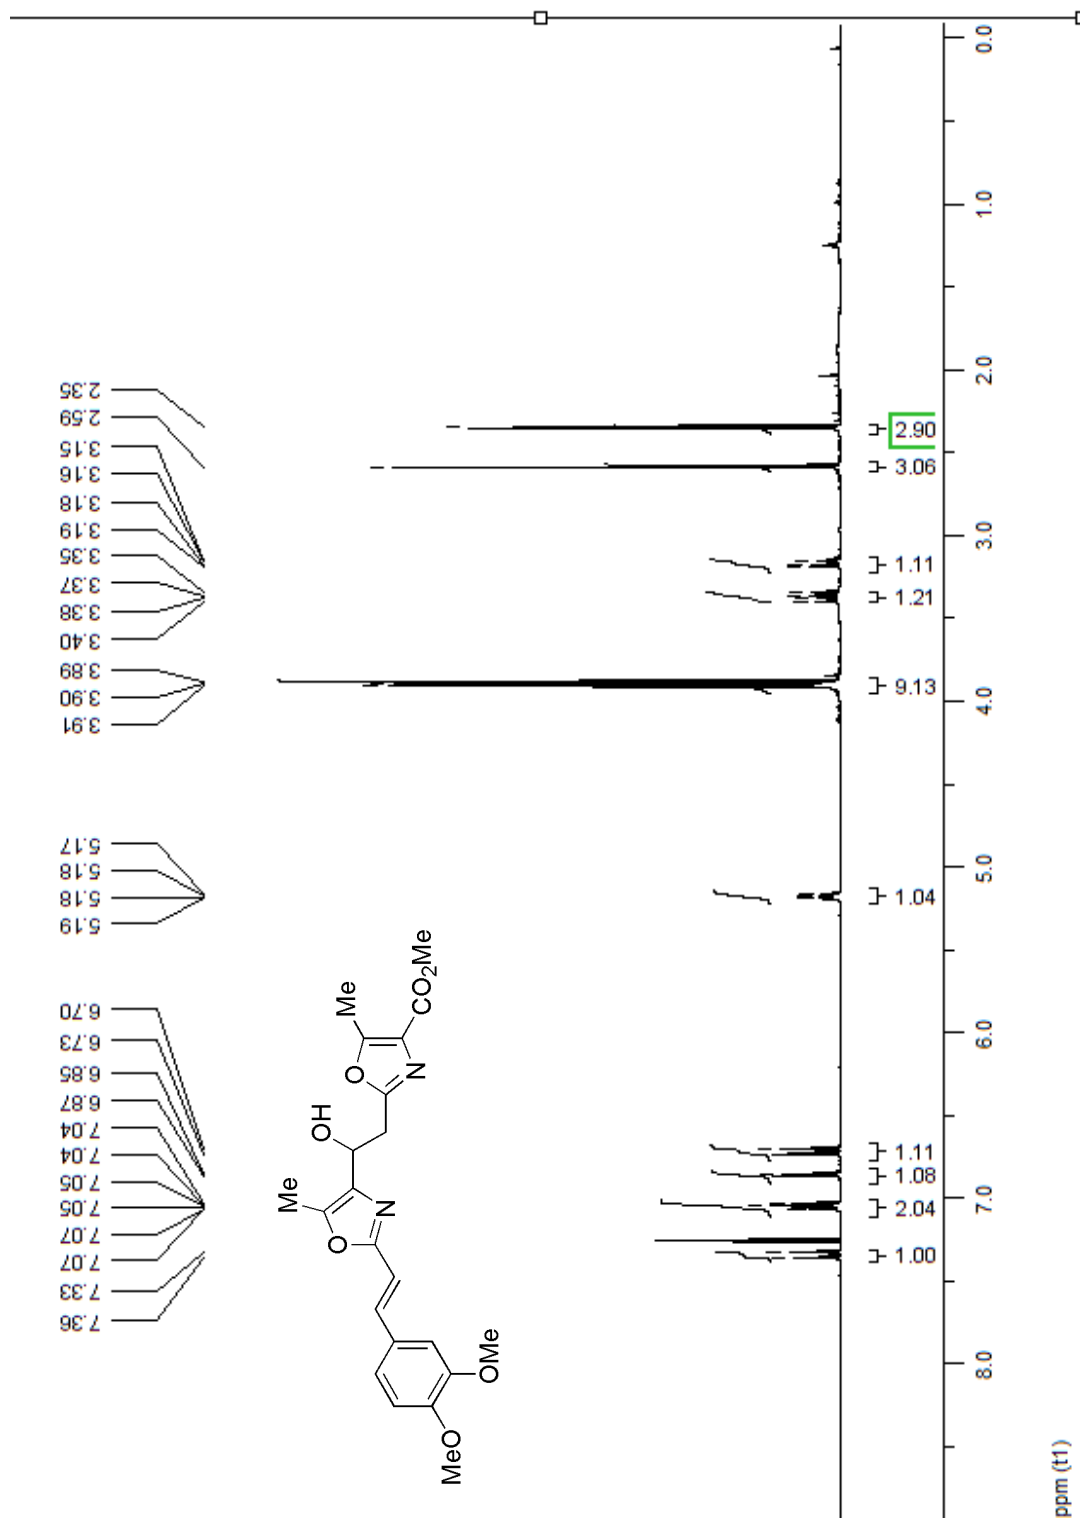

ESI69

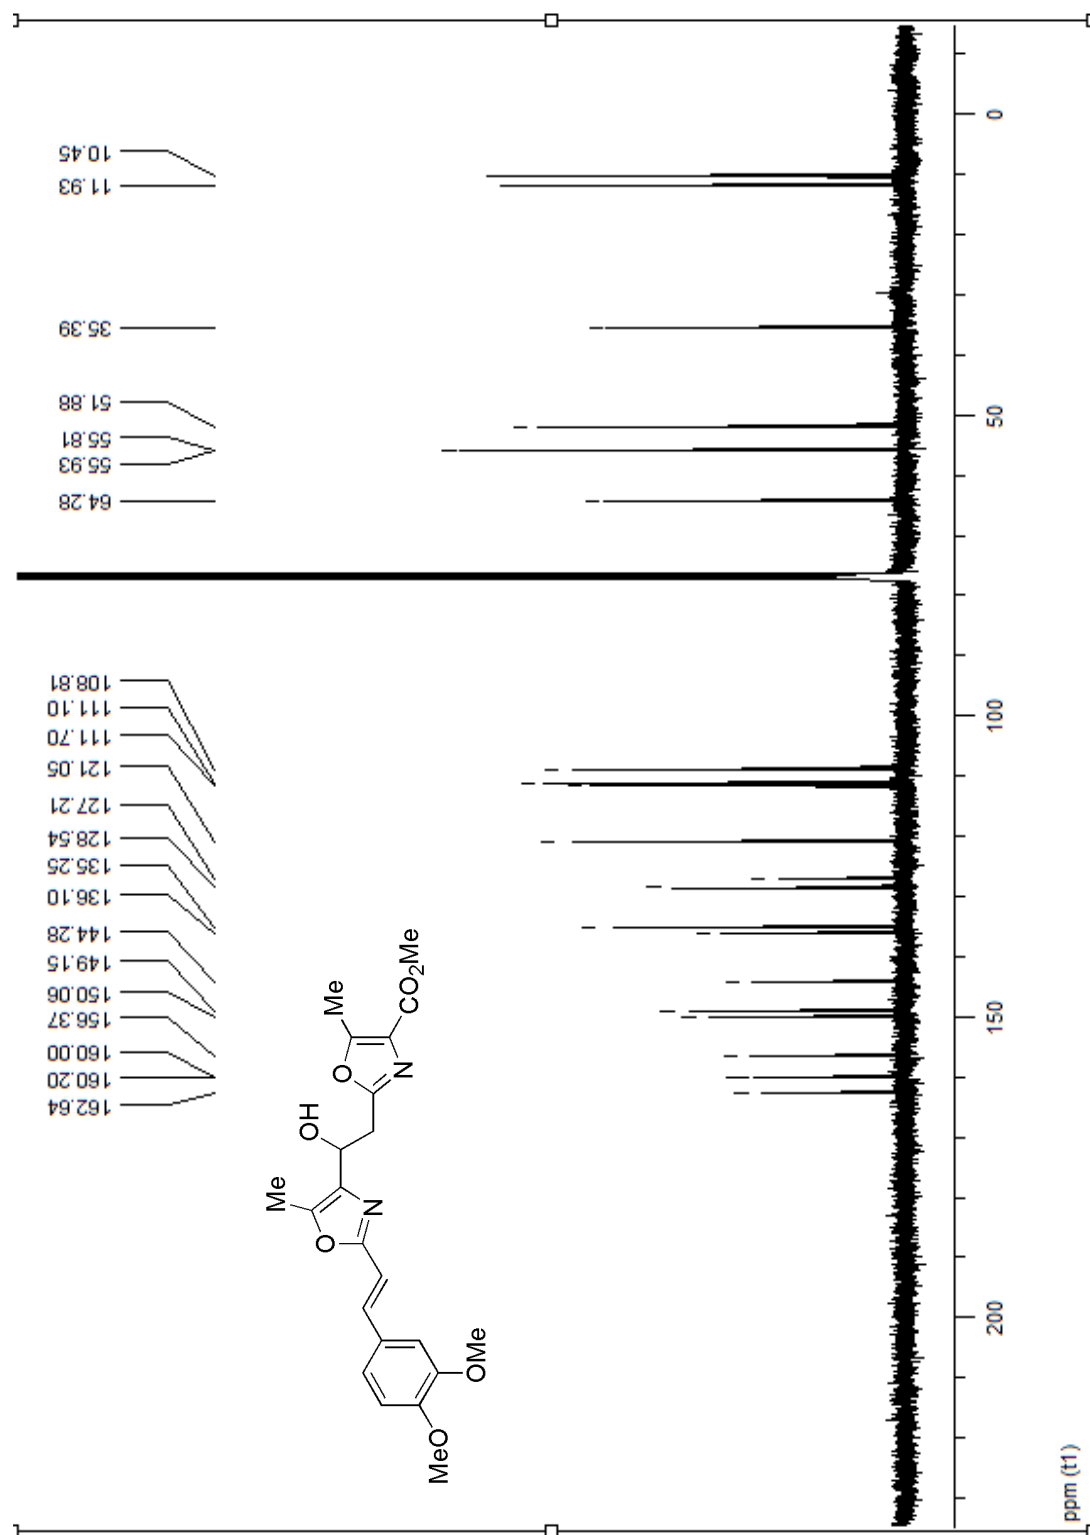

ESI70

Methyl 2-(2-(2-(3,4-dimethoxystyryl)-5-methyloxazol-4-yl)-2-oxoethyl)-5-methyloxazole-4-carboxylate 18

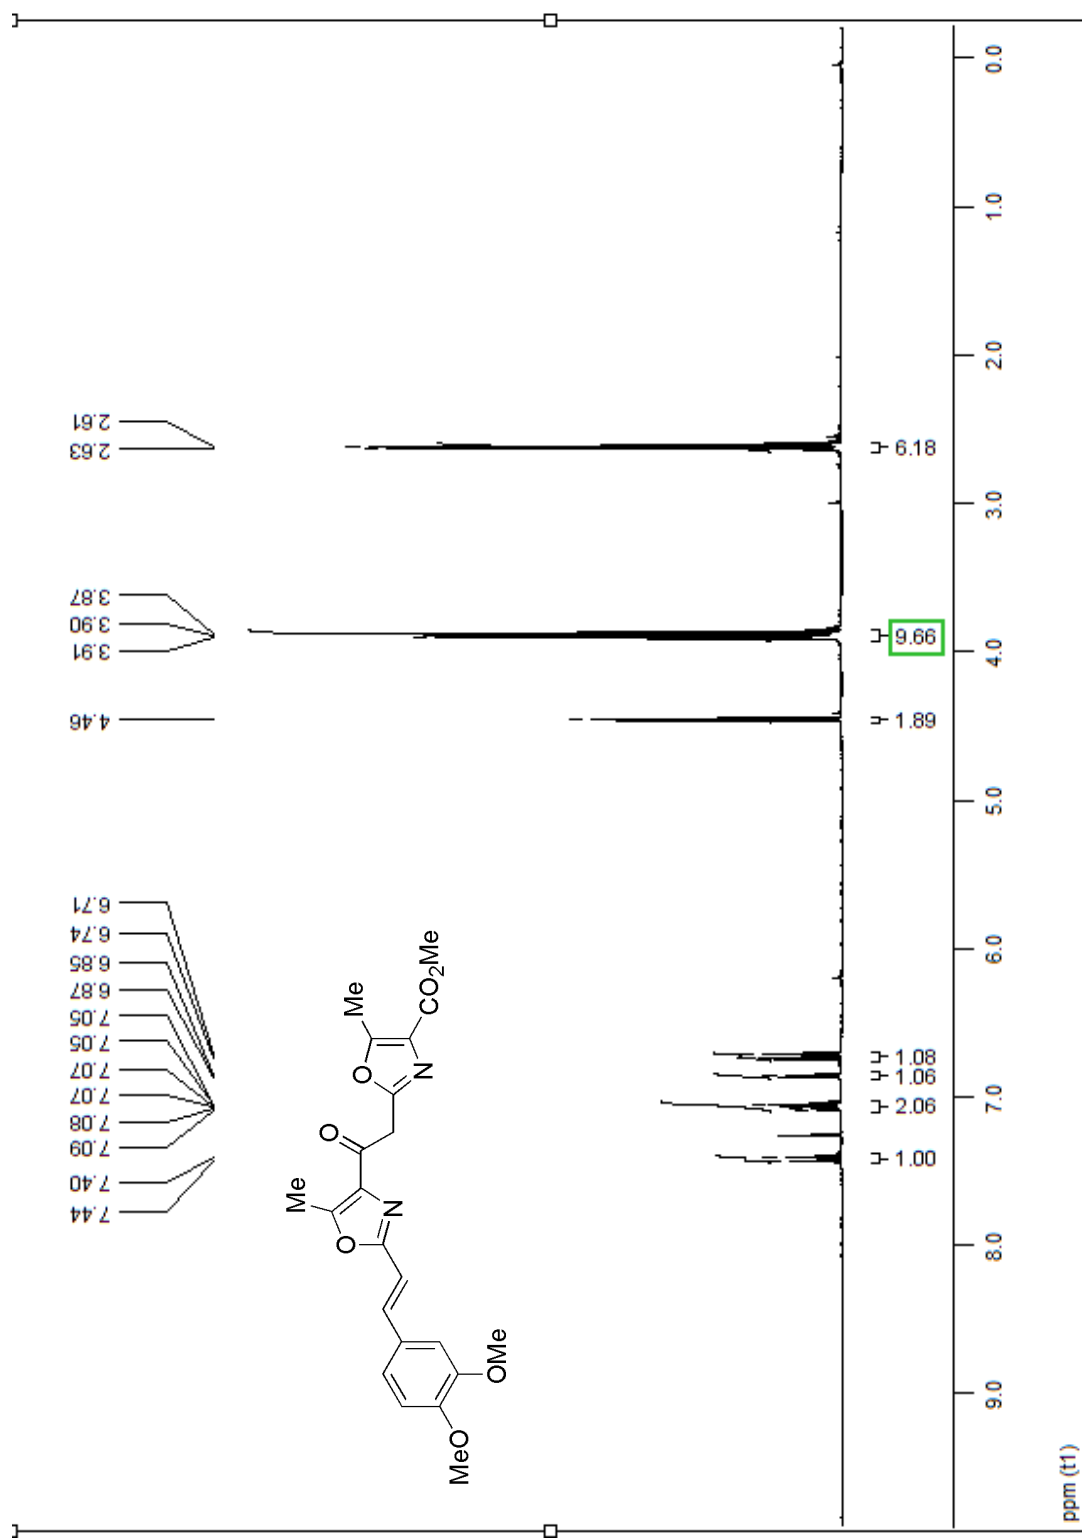

ESI71

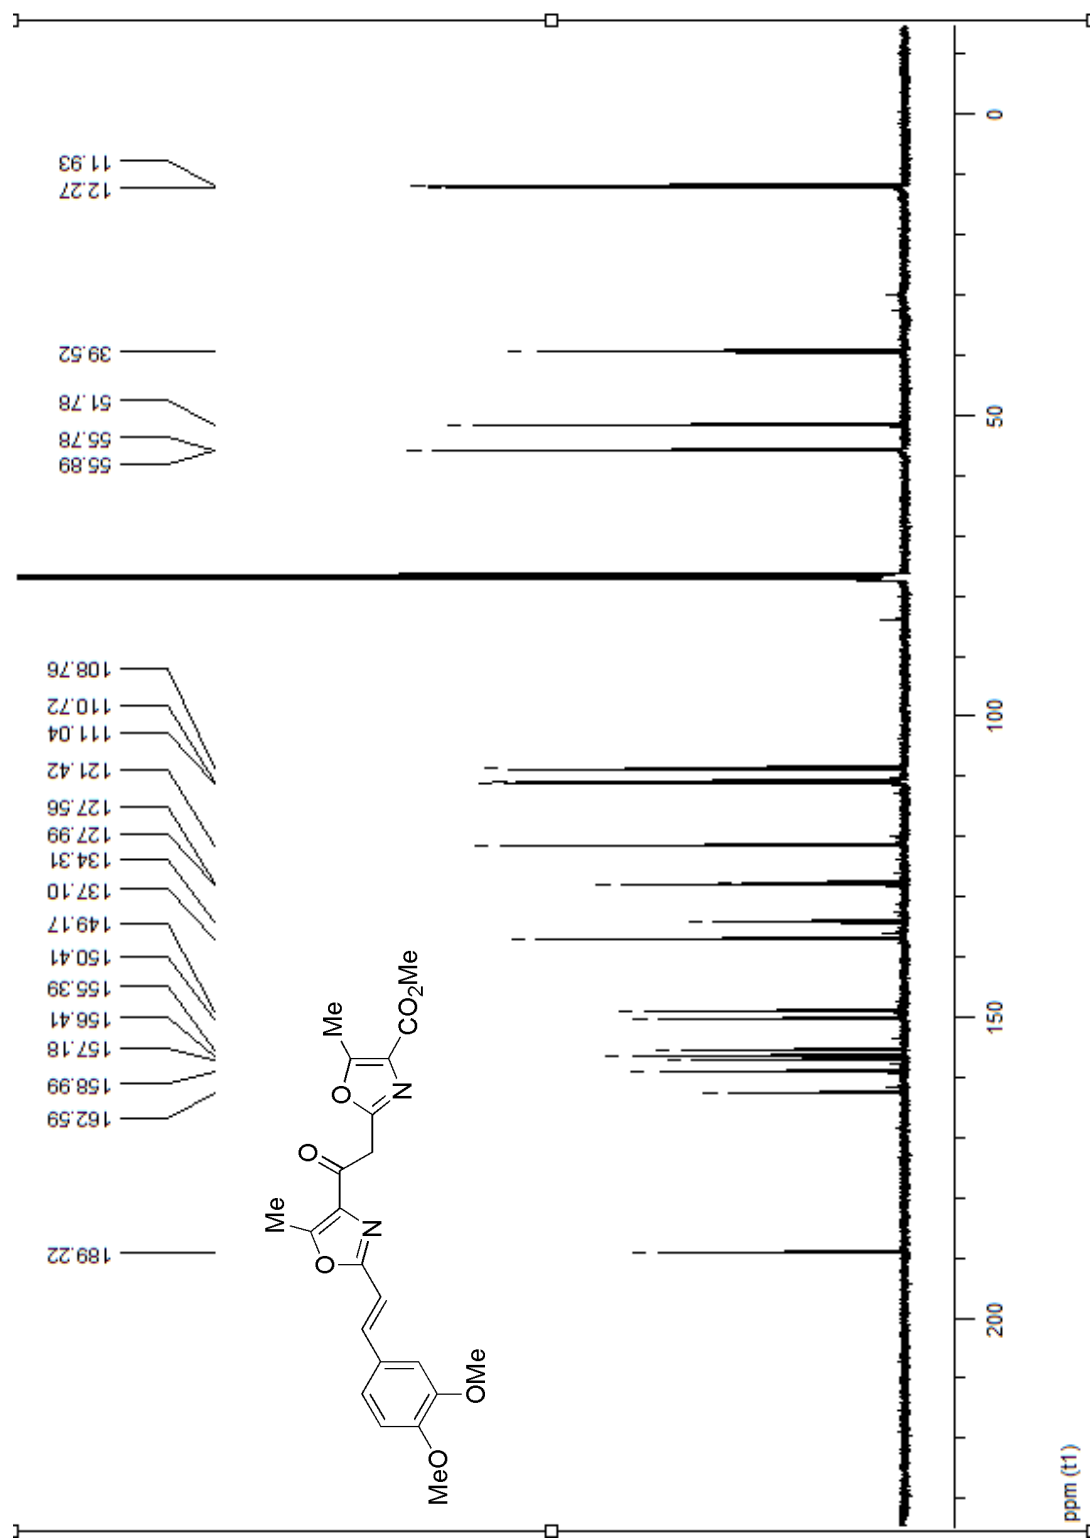

ESI72

***O*-Methyl siphonazole 2**

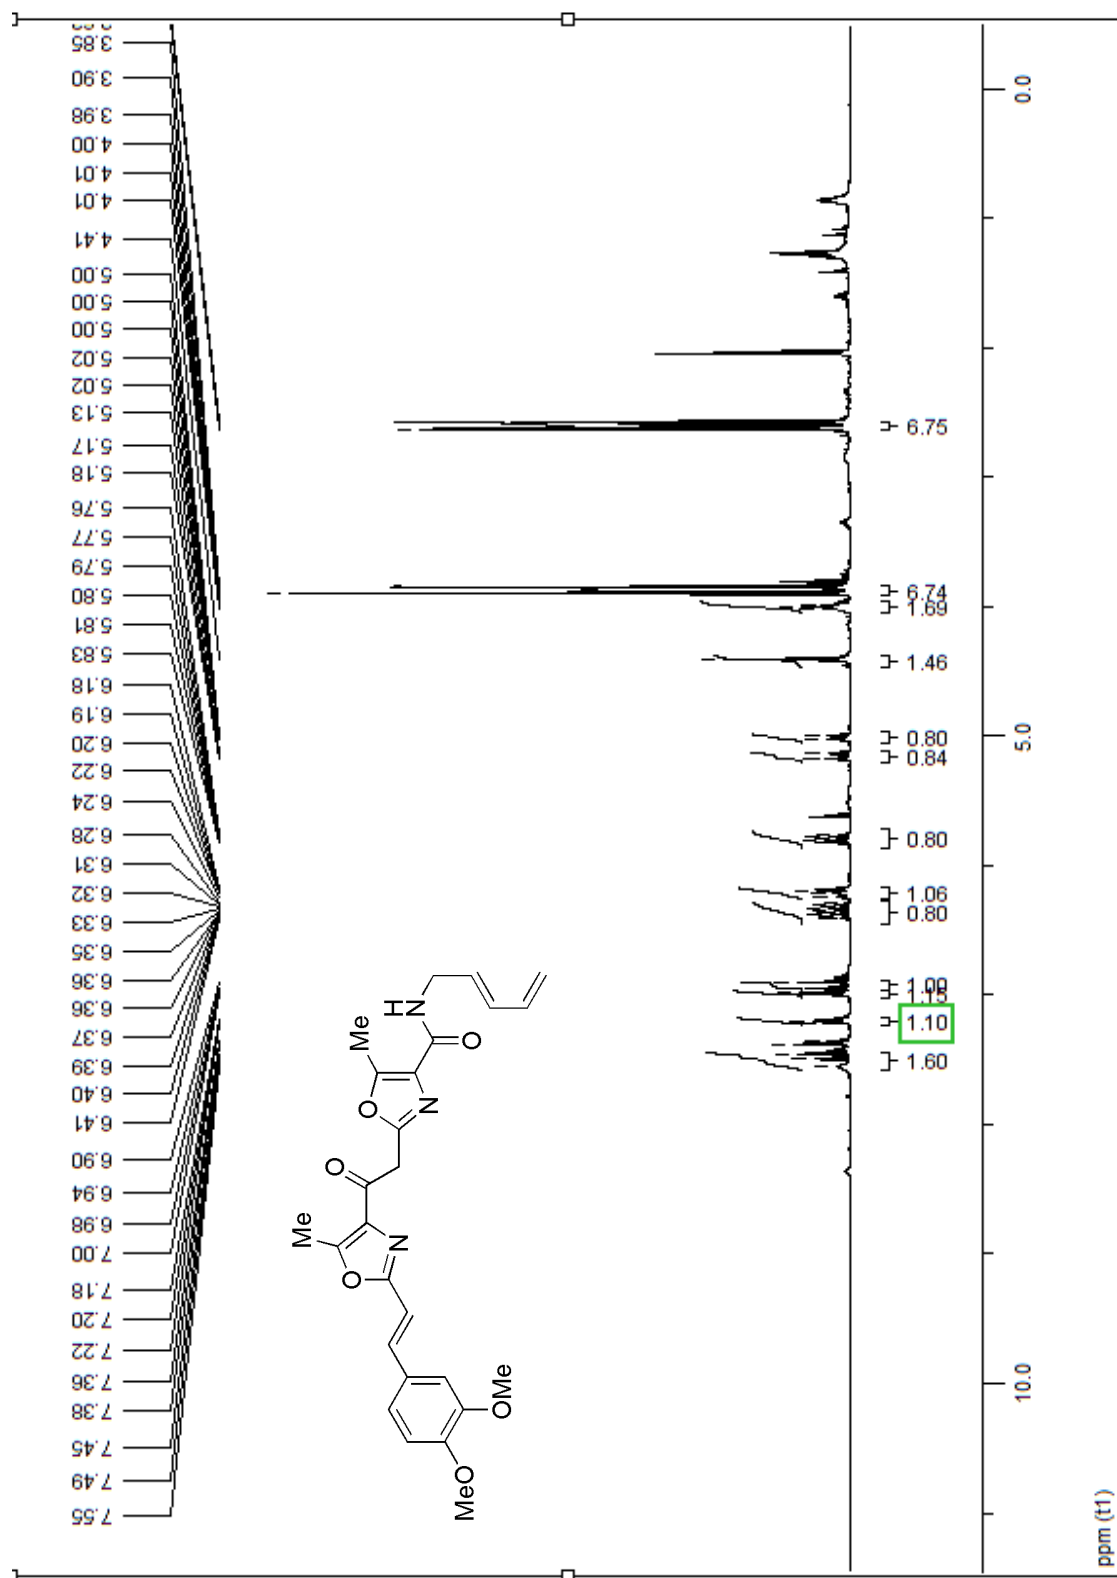



ESI73

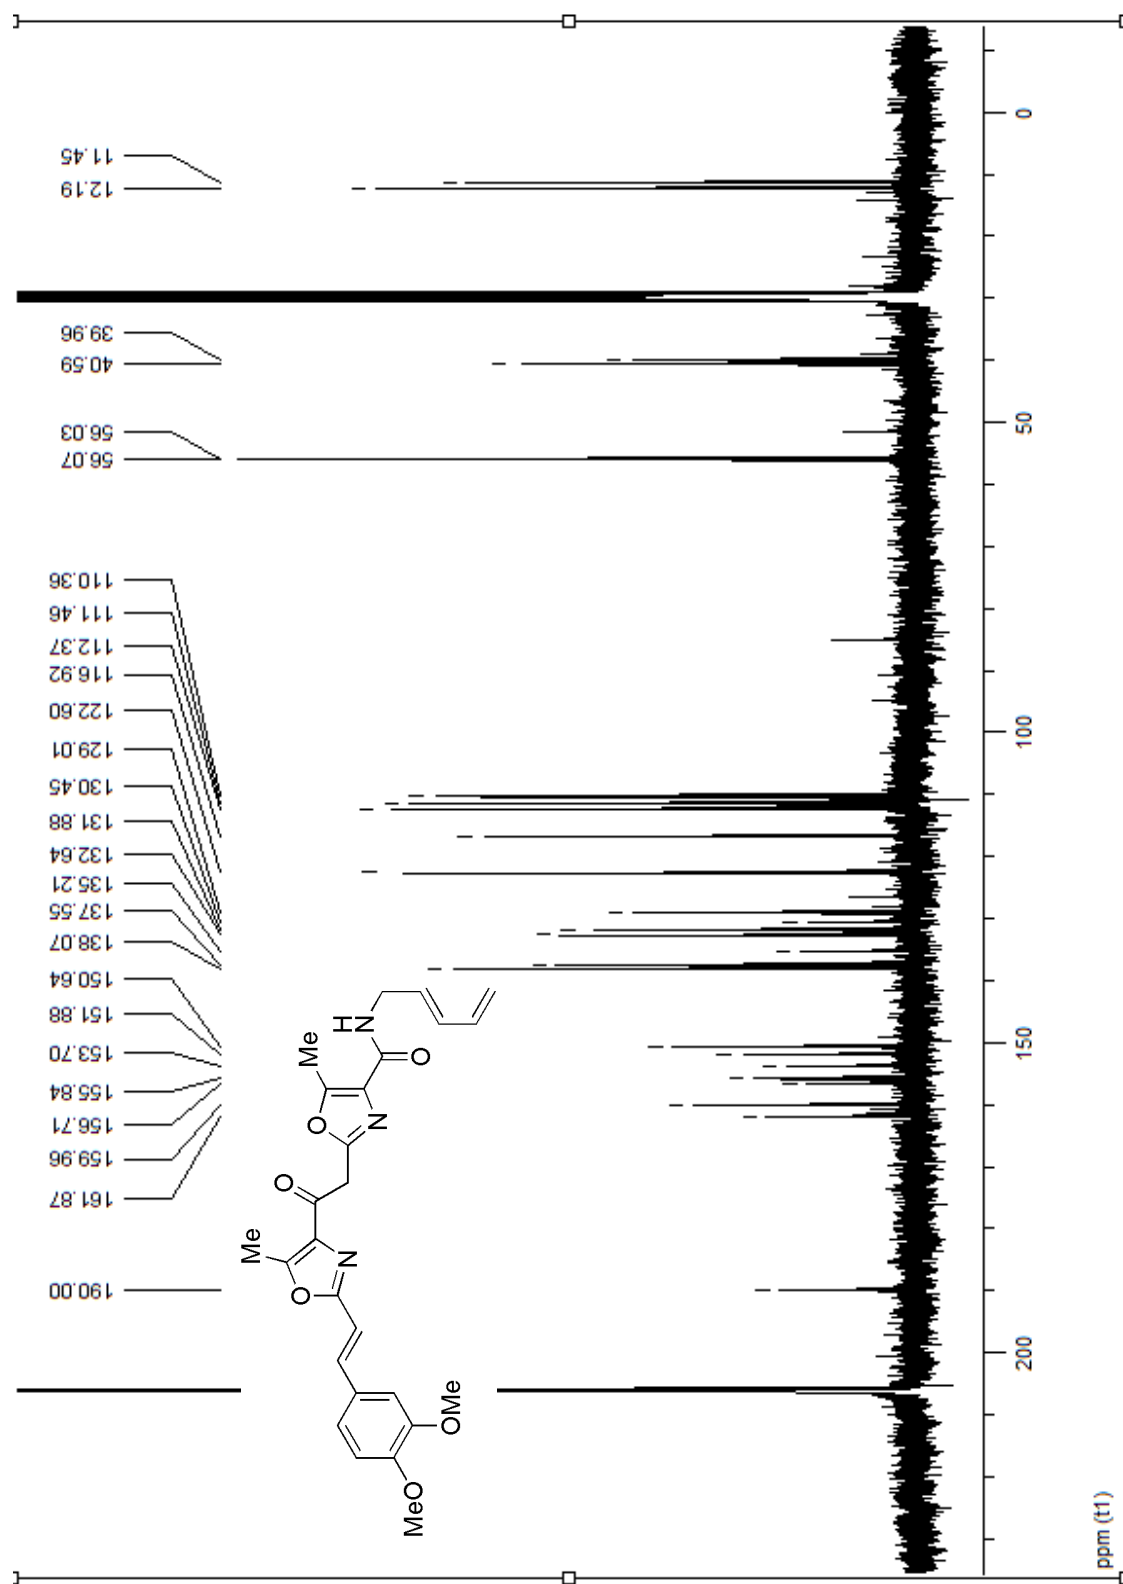

### Comparison of HPLC-retention times of natural, synthetic and a mixture of natural and synthetic siphonazole

Column: Varian Polaris C<sub>18</sub>, 5 mm, 250 x 4.6 mm, eluent: acetonitrile/water 75:25; flow rate: 1 mLmin<sup>-1</sup>

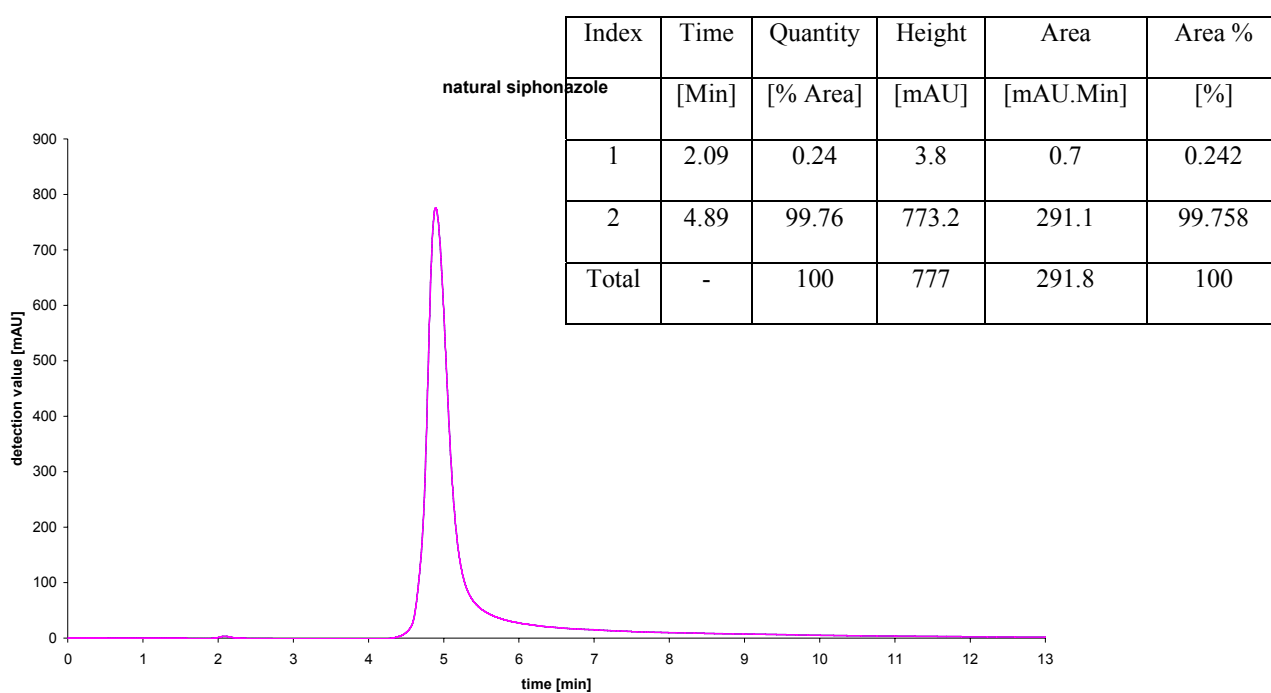

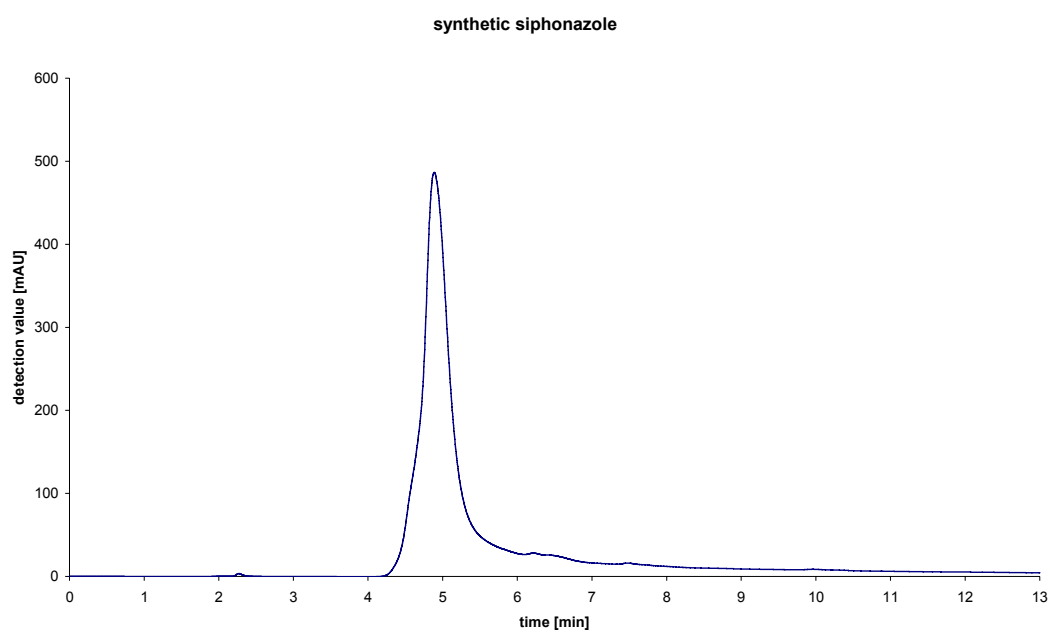

| Index | Time  | Quantity | Height | Area      | Area % |
|-------|-------|----------|--------|-----------|--------|
|       | [Min] | [% Area] | [mAU]  | [mAU.Min] | [%]    |
| 1     | 2.27  | 0.21     | 3.5    | 0.5       | 0.205  |
| 2     | 4.88  | 99.14    | 478.4  | 217.6     | 99.144 |
| 3     | 6.2   | 0.34     | 4.2    | 0.8       | 0.344  |
| 4     | 7.49  | 0.24     | 1.8    | 0.5       | 0.237  |
| 5     | 9.97  | 0.07     | 0.7    | 0.2       | 0.069  |
| Total | -     | 100      | 488.6  | 219.5     | 100    |

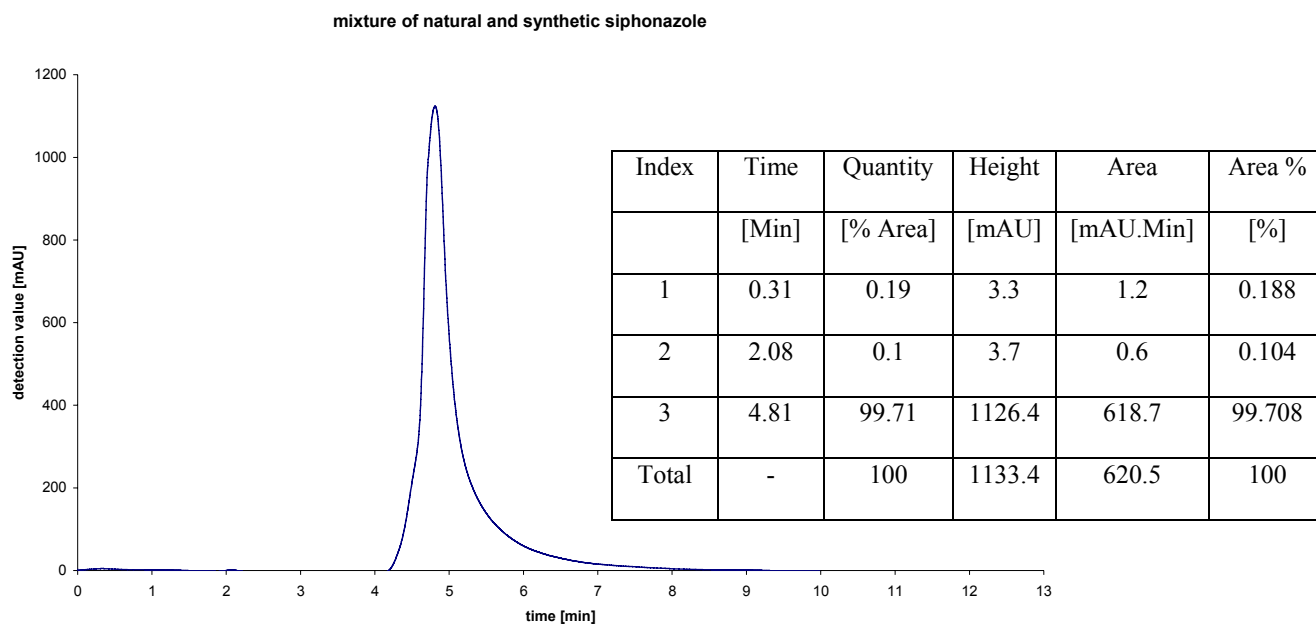

## References

1. M. C. Bagley, R. T. Buck, S. L. Hind and C. J. Moody, *J. Chem. Soc., Perkin Trans. 1*, 1998, 591.
2. E. Lorz, L. P. Albro and R. Baltzly, *J. Am. Chem. Soc.*, 1951, **73**, 483.
3. C. Batsila, G. Kostakis and L. P. Hadjarapoglou, *Tetrahedron Lett.*, 2002, **43**, 5997.
4. C. Shin, Y. Sato, H. Sugiyama, K. Nanjo and J. Yoshimura, *Bull. Chem. Soc. Jpn.*, 1977, **50**, 1788.
5. J. Rodriguez and B. Waegell, *Synthesis*, 1988, 534.
6. K. Mori, *Tetrahedron*, 1974, **30**, 3807.
7. P. A. Grieco, P. Galatsis and R. F. Spohn, *Tetrahedron*, 1986, **42**, 2847.
